# Supplementary material for: Assessment of Glyphosate Induced Epigenetic Transgenerational Inheritance of Pathologies and Sperm Epimutations: Generational Toxicology
Source: PubMed Central journal article supplement (PMC6476885; doi:10.1038/s41598-019-42860-0), 2019-04-23
Supplement: 41598_2019_42860_MOESM1_ESM.pdf [file 41598_2019_42860_MOESM1_ESM.pdf]

**Glyphosate Induced Epigenetic Transgenerational Inheritance of  
Pathologies and Sperm Epimutations: Generational Toxicology**

**Deepika Kubsad, Eric E. Nilsson, Stephanie E. King, Ingrid Sadler-Riggelman,  
Daniel Beck and \*Michael K. Skinner**

Center for Reproductive Biology  
School of Biological Sciences  
Washington State University  
Pullman, WA, 99164-4236, USA

**Supplemental Material**

## Supplemental Figure and Table Legends

**Figure S1.** Glyphosate usage. **(a)** Estimated USA agricultural use for glyphosate in 2015. **(b)** Glyphosate use by year and crop. From U.S. Geological Survey Pesticide Use Maps, accessed February 12, 2018.

([https://water.usgs.gov/nawqa/pnsp/usage/maps/show\\_map.php?year=2011&map=GLYPHOSATE&hilo=L&disp=Glyphosate](https://water.usgs.gov/nawqa/pnsp/usage/maps/show_map.php?year=2011&map=GLYPHOSATE&hilo=L&disp=Glyphosate))

**Figure S2.** F3 generation glyphosate and control histopathology. **(a)** Testis histological abnormalities. A. Atrophic seminiferous tubule showing reduced Sertoli and germ cells (black arrow). Blue arrowhead indicates a round, smooth-edged, basally located vacuole. **(b)** Control testis showing normal seminiferous tubules. Scale bars = 100  $\mu\text{m}$ . **(c)** Prostate histological abnormalities. Prostate glands showing thinning atrophic glandular epithelium (black arrows). **(d)** Normal prostate glands with normal thickness epithelium. **(e)** Prostate gland with epithelial hyperplasia (blue arrowhead). **(f)** Small vacuole in prostate epithelial layer of gland (red arrow). Scale bars = 100  $\mu\text{m}$ . Kidney histological abnormalities. **(g)** Kidney histological abnormalities. Severely affected kidney showing a glomerulus (blue arrowhead) with a reduced area of the glomerular tuft and a thickened Bowman's capsule. Black arrows show examples of cysts, likely of renal tubular origin. **(h)** Kidney showing histologically normal glomeruli and renal tubules. Scale bars = 100  $\mu\text{m}$ . **(i)** Ovary histological features counted. Large ovarian cysts (blue arrows), distinguished from follicles by the absence of a distinct granulosa cell layer. **(j)** Primordial (red arrows) and primary (black arrow) ovarian follicles are indicated. Other pre-antral follicles lower in this image were not counted as their oocytes did not have clearly visible nuclei. Scale bars =

100  $\mu\text{m}$ . **(k)** Adipocyte size histological abnormalities. Adipocyte area with enlarge size ( $6129 \mu\text{m}^2$ ) from F3 generation glyphosate lineage gonadal fat pad. Scale bars = 100  $\mu\text{m}$ . **(l)** Adipocyte area with normal size ( $3103 \mu\text{m}^2$ ) from F3 generation control lineage gonadal fat pad.

**Figure S3.** Additional pathology data. **(a)** Fertility rates, **(b)** litter size, and **(c)** F3 generation gestational length (days). The mean  $\pm$  SEM presented.

**Figure S4.** Behavior analysis. Bars on left of panels / graph are female and right of panels / graph are male for control and glyphosate lineage F3 generation. LDB = light-dark box. EPM = elevated plus maze. The mean  $\pm$  SEM presented and (\*) indicates  $p < 0.05$ .

**Figure S5.** DMR genomic features. **(a, c, e)** The number of DMRs at different CpG densities for all DMRs at a p-value threshold of  $p < 1 \times 10^{-6}$ . **(b, d, f)** The DMR lengths for all DMRs at a p-value threshold of  $p < 1 \times 10^{-6}$ . **(a, b)** F1 generation. **(c, d)** F2 generation. **(e, f)** F3 generation.

**Figure S6.** F1 and F2 generation DMR principle component analysis (PCA). The F1 and F2 generation DMRs and not whole genome were used for the PCA analysis. All DMRs are defined using an edgeR p-value threshold of  $1 \times 10^{-6}$ . **(a)** PCA F1 generation control and glyphosate analysis with legend insert. **(b)** PCA F2 generation control and glyphosate DMR analysis with legend insert. The control (PBS), control (DMSO) and glyphosate generation lineage (GF1 or GF2) indicated.

**Figure S7.** Founder effect. **(a)** Normalized Obesity Frequency of generation offspring to determine lineage effects. Fifteen wild type males were assessed for the frequency of obesity phenotype which had offspring in five different colonies. The number of males or females in each litter ( $N_L$ ) was divided by the number of males and females in the colony ( $N_C$ ) in order to control for litter size. The frequency of obesity in the litter ( $f_i$ ) was multiplied by ( $N_L/N_C$ ). The product was divided the frequency of obesity in the colony ( $f_c$ ) to create a normalized frequency of obesity in the offspring ( $f_n$ ). The average of all ( $f_n$ ) litters the wild type sired was subtracted by ( $f_c$ ) to assess the lineage based attributed phenotype. Wildtype 41 (W41) was identified as having a larger attributed phenotype and was the ancestral sire of the two unusual litters previously mentioned. The F1 generation litter he sired had five out of five females and one out of 4 males (67% frequency) that were determined to be obese. As the lineage was determined to be an outlier, it was removed from the study. **(b)** During the assessment of obesity in the F3 generation glyphosate and glyphosate control lineage rats, two unusual litters had high levels of obesity (88% frequency) in comparison to the rest of the colony (20% frequency). To determine if this effect was a founder's effect lineage phenomenon, the litters were traced back to a common ancestor. The F1 and F2 generation glyphosate and glyphosate control lineage rats were assessed for obesity and a formula was developed to normalize expected obesity by treatment group based on colony frequency.

**Table S1.** F1 generation individual animal pathology. **(a)** Glyphosate Male. **(b)** Control Male. **(c)** Glyphosate Female. **(d)** Control Female. (+) Indicates pathology present and (-) indicates no pathology and blank box not examined.

**Table S2.** F2 generation individual animal pathology. **(a)** Glyphosate Male. **(b)** Control Male. **(c)** Glyphosate Female. **(d)** Control Female. (+) Indicates pathology present and (-) indicates no pathology and blank box not examined.

**Table S3.** F3 generation individual animal pathology. **(a)** Glyphosate Male. **(b)** Control Male. **(c)** Glyphosate Female. **(d)** Control Female. (+) Indicates pathology present and (-) indicates no pathology and blank box not examined.

**Table S4.** F1 generation DMR list.

**Table S5.** F2 generation DMR list.

**Table S6.** F3 generation DMR list.

Figure S1

a Estimated USA agricultural use for glyphosate, 2015

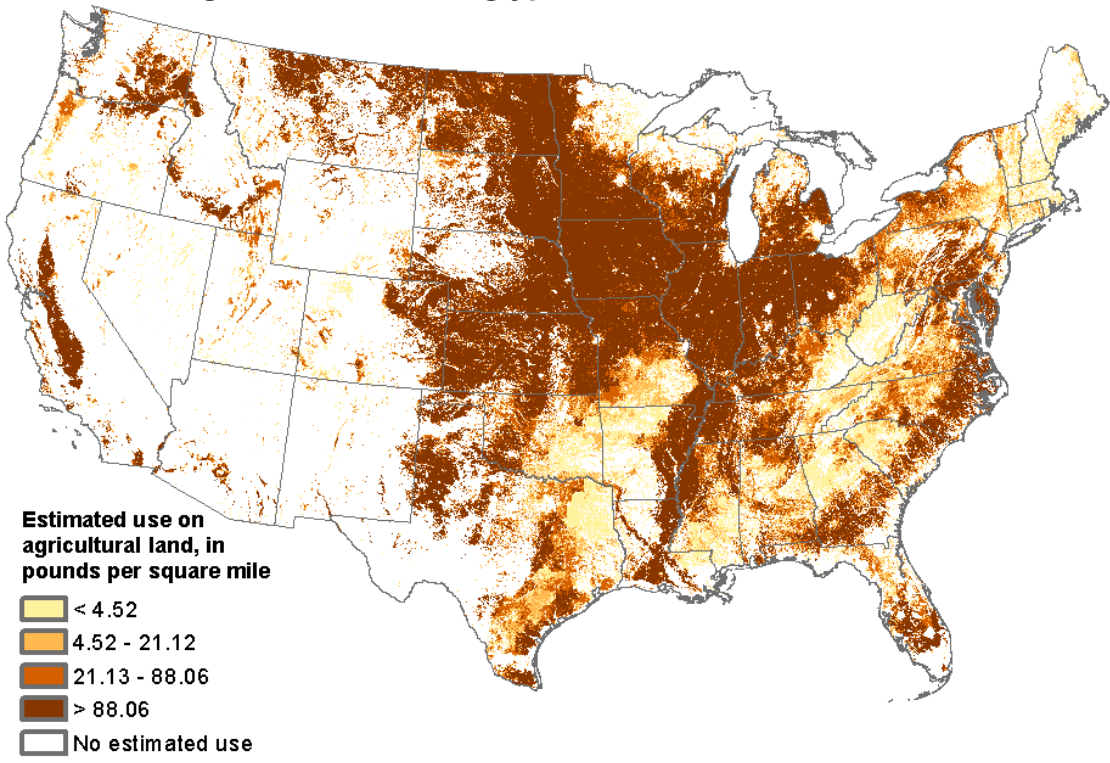

b Glyphosate use by year and crop

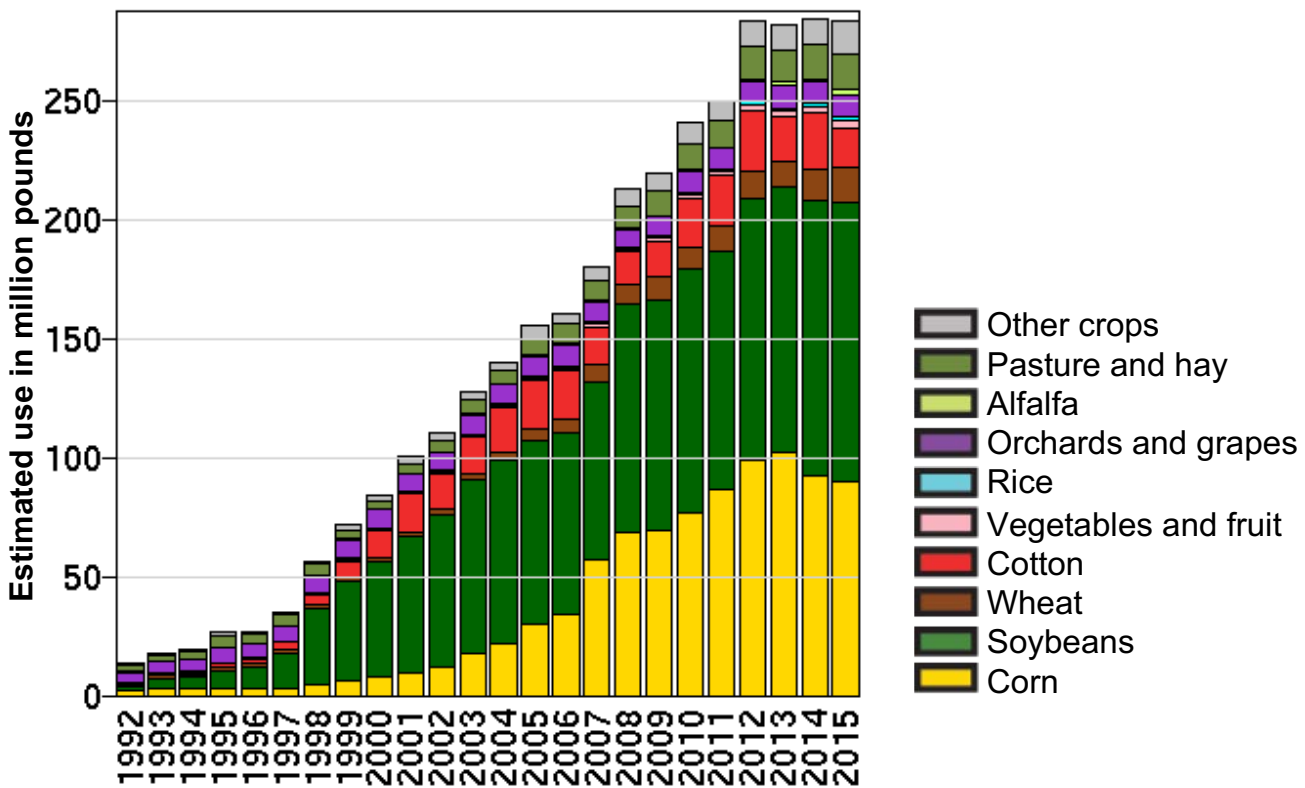

Figure S2

Testis Pathology (F3 Generation)

**a** Glyphosate

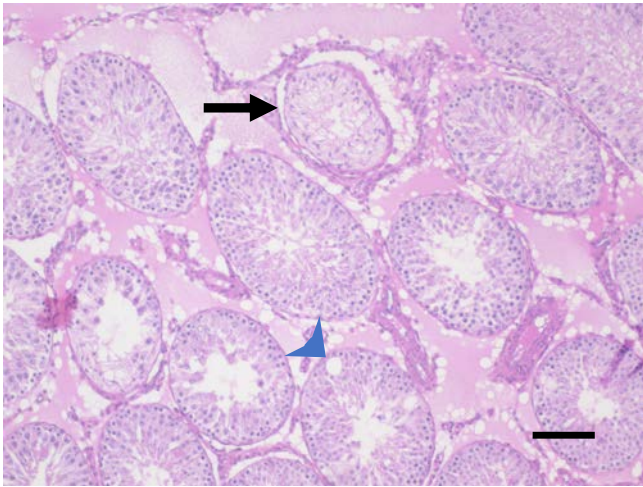

**b** Control

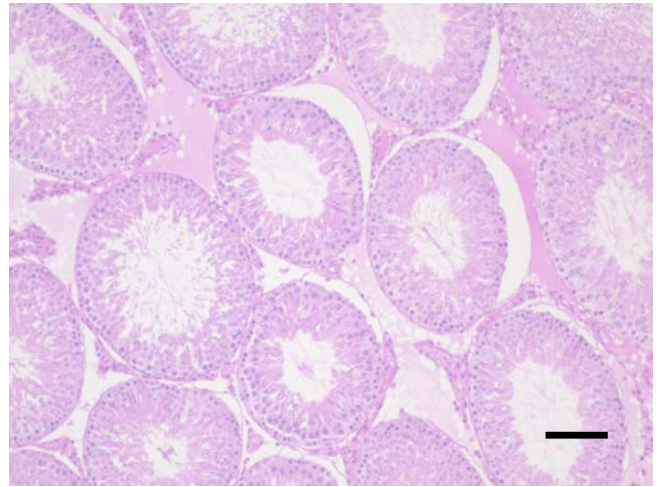

Prostate Pathology (F3 Generation)

**c** Glyphosate

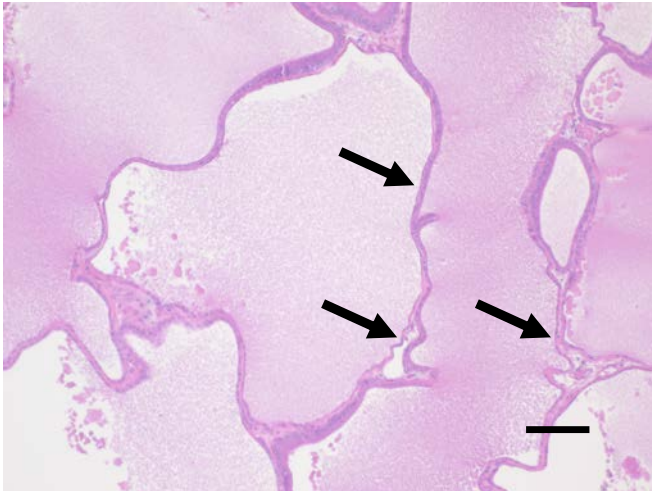

**d** Control

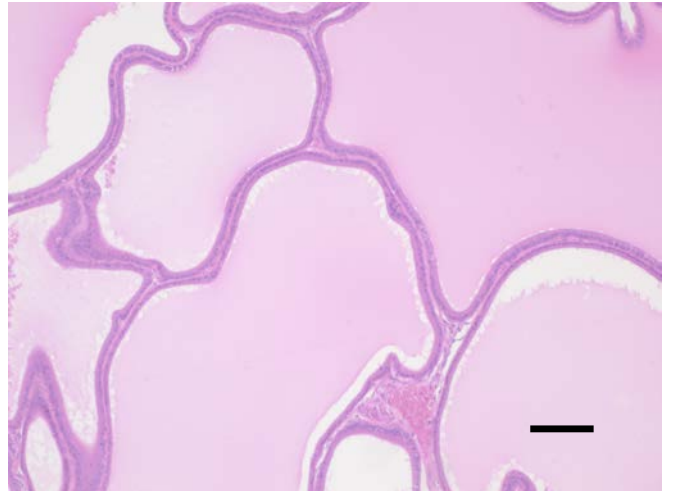

**e** Glyphosate

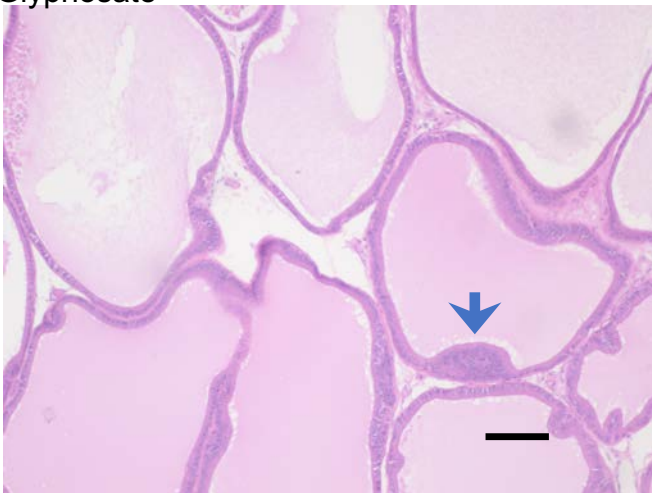

**f** Control

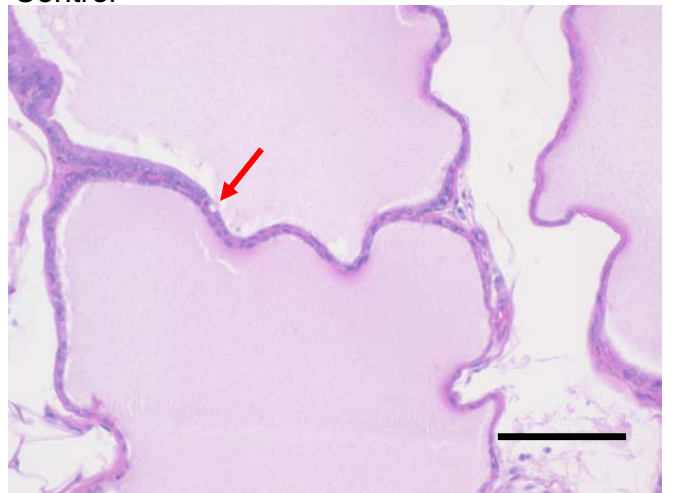

Figure S2 (continued)

Kidney Pathology (F3 Generation)

**g** Glyphosate

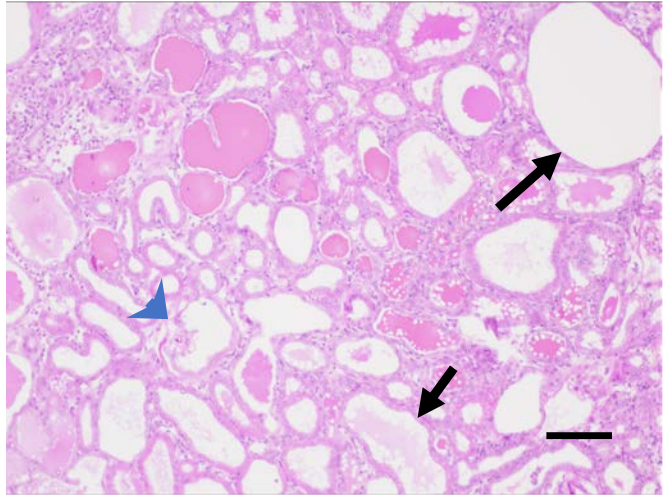

**h** Control

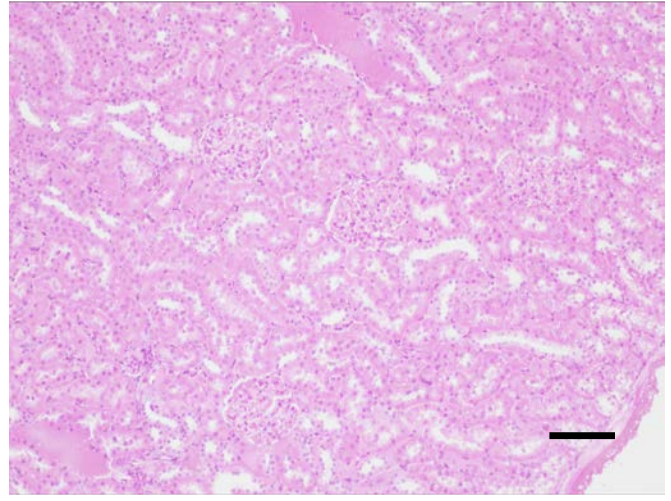

Ovary Pathology (F3 Generation)

**i** Glyphosate

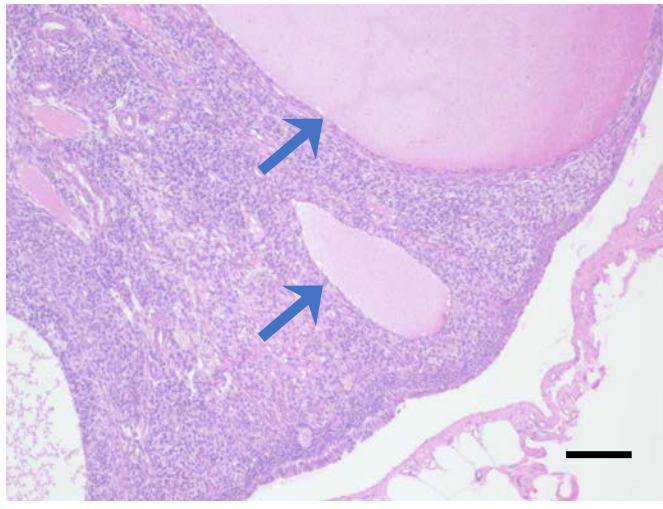

**j** Control

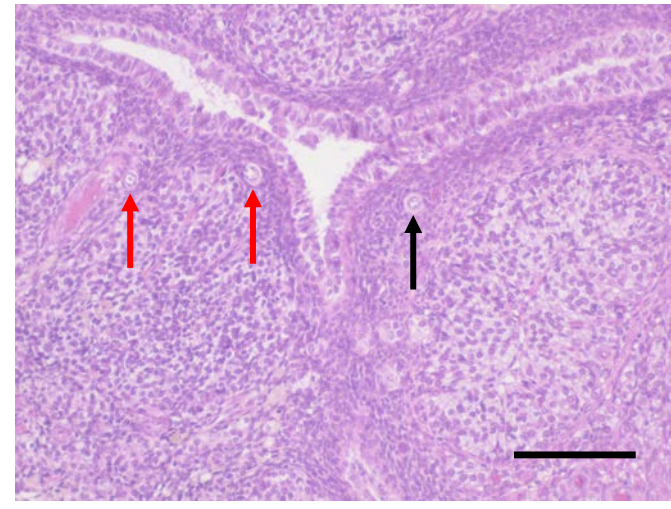

Adipocyte Pathology (F3 Generation)

**k** Glyphosate

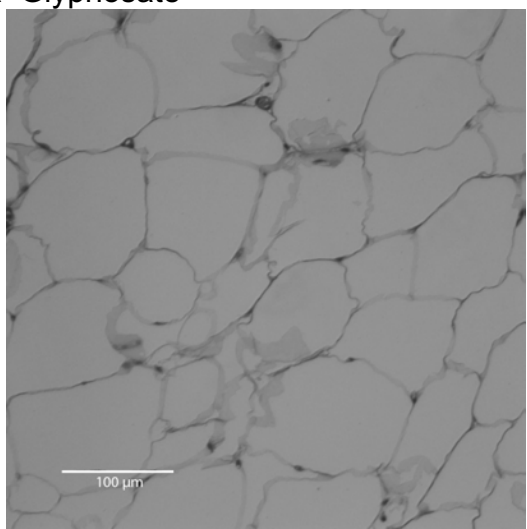

**l** Control

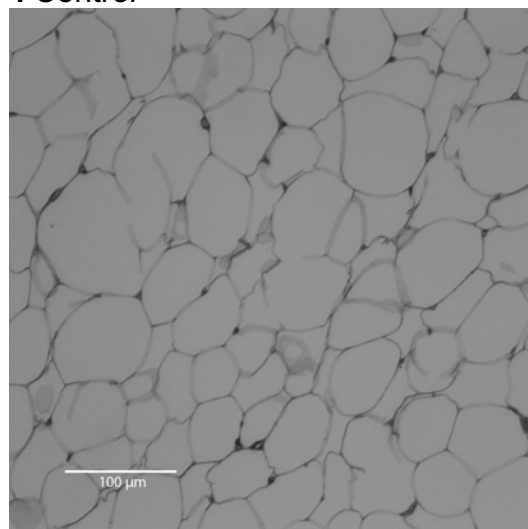



Figure S3

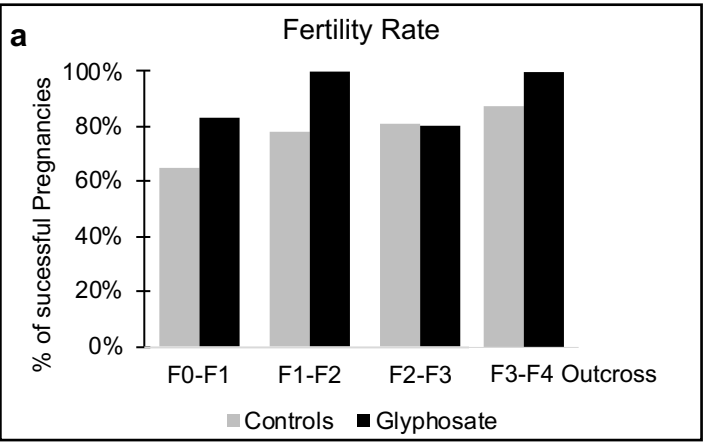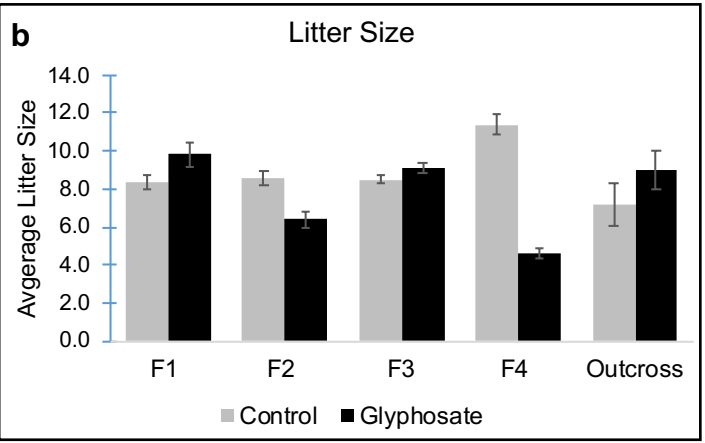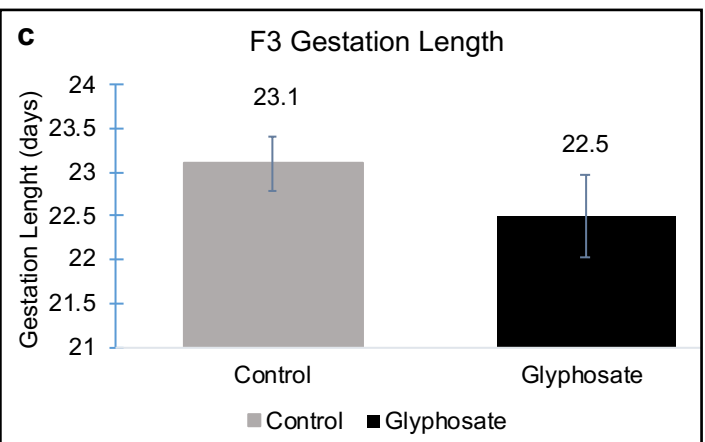

Figure S4

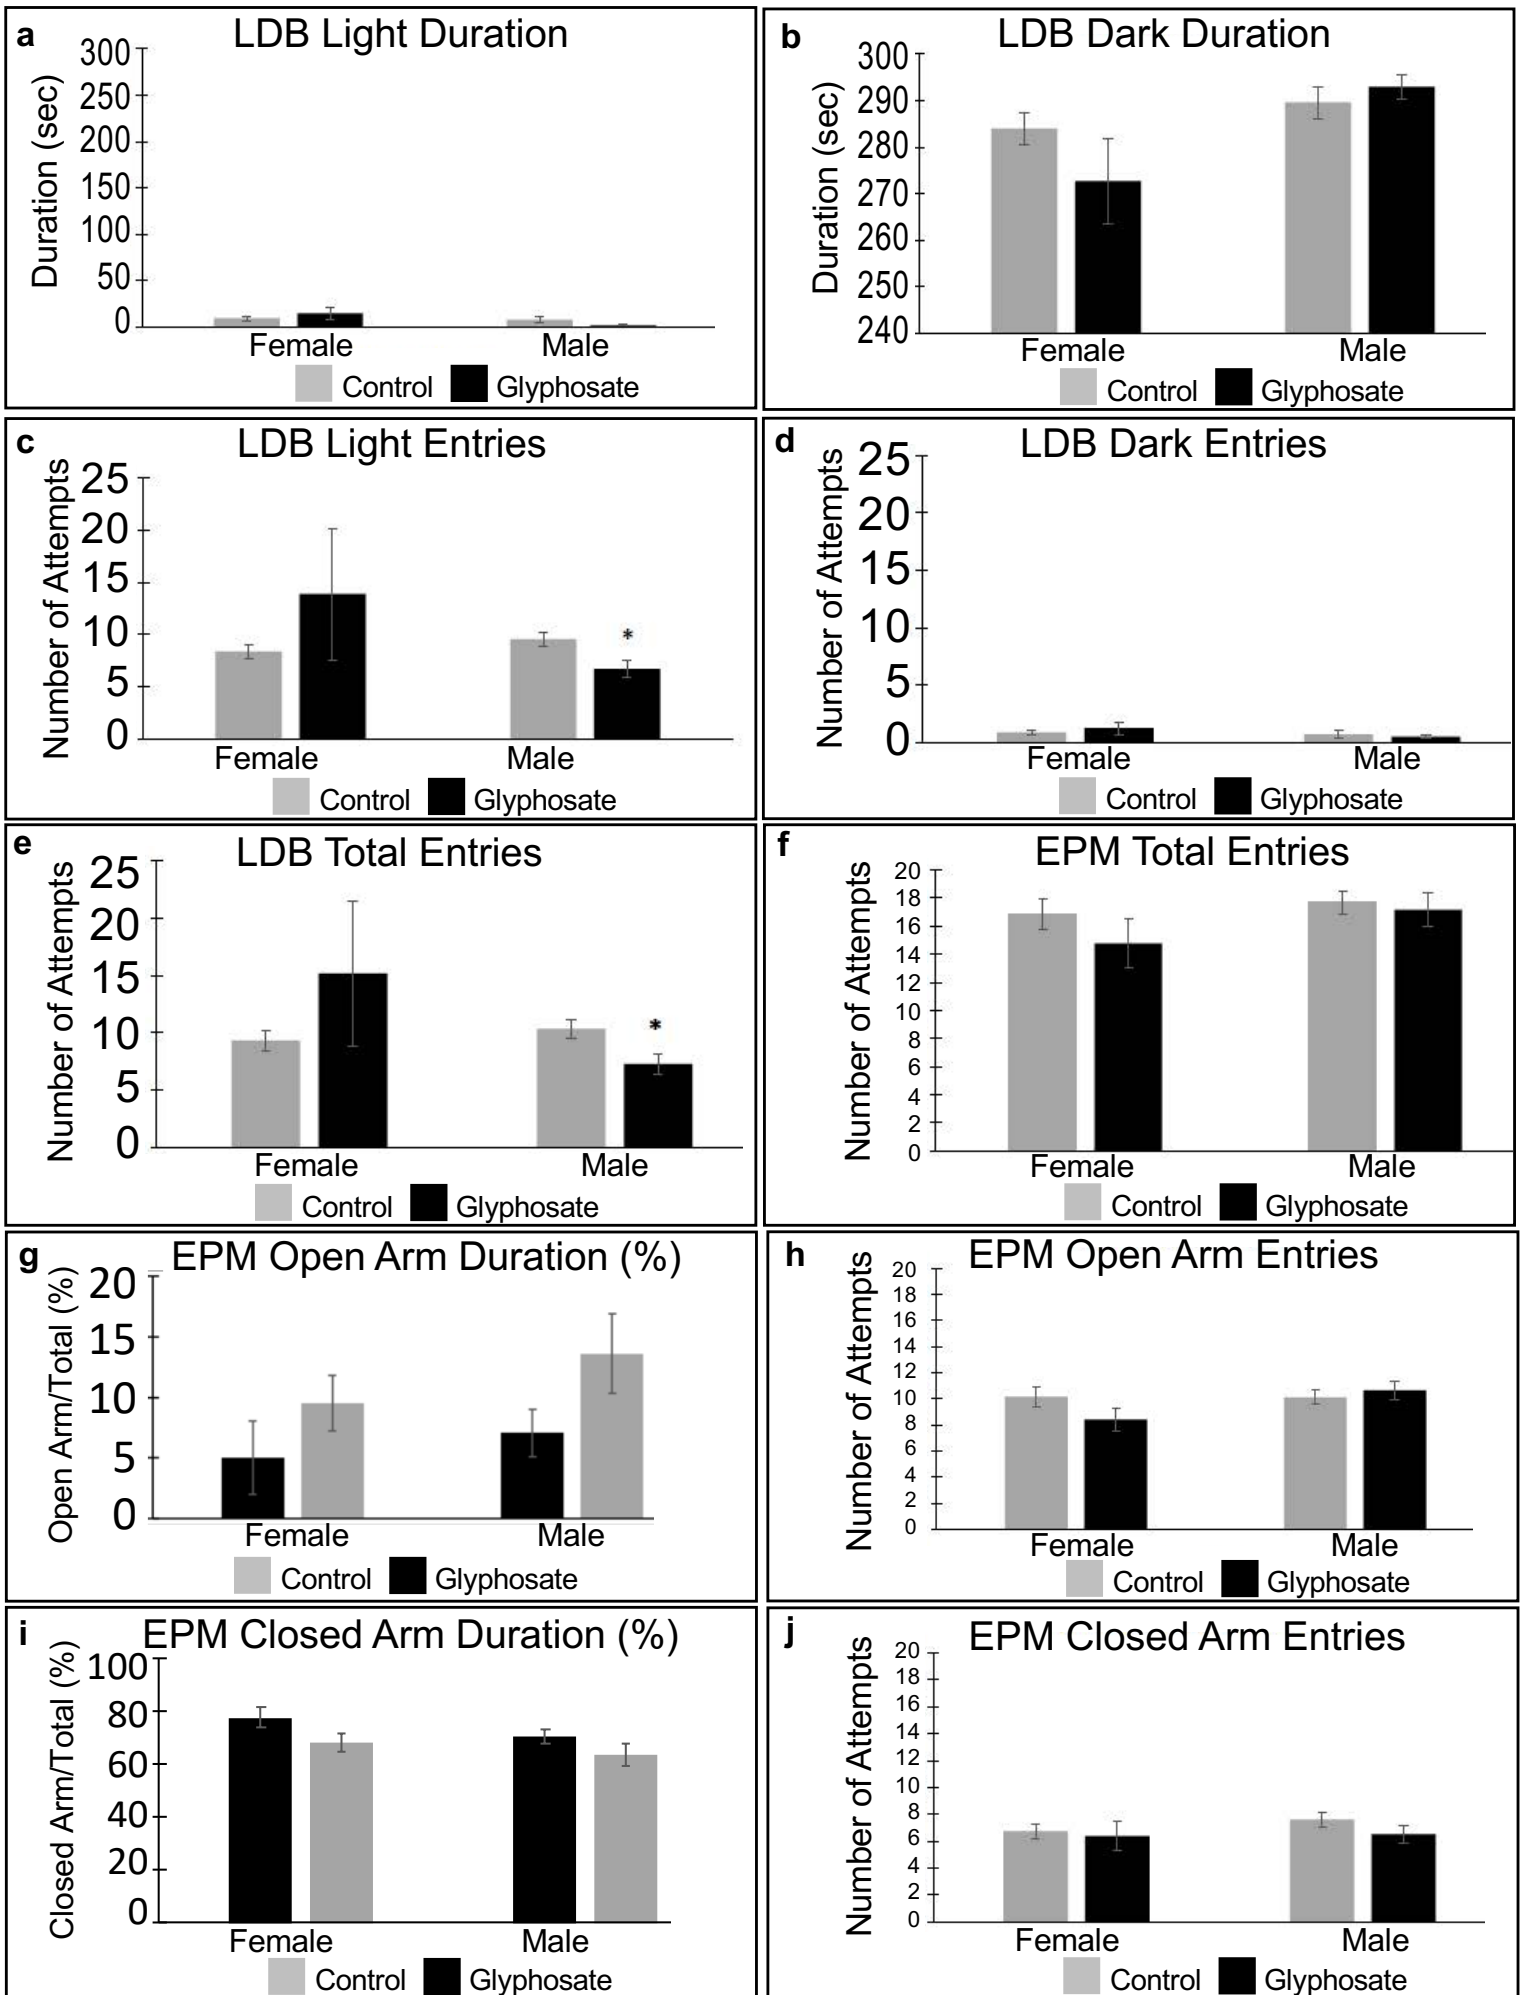

Figure S5

## DMR density and length

**a** DMR CpG density F1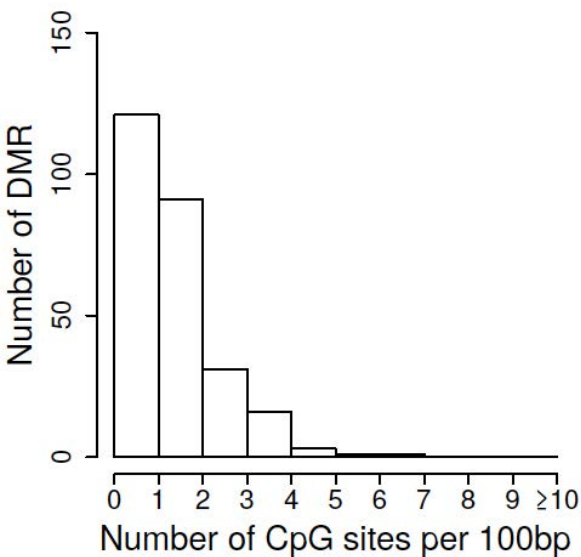**b** DMR length F1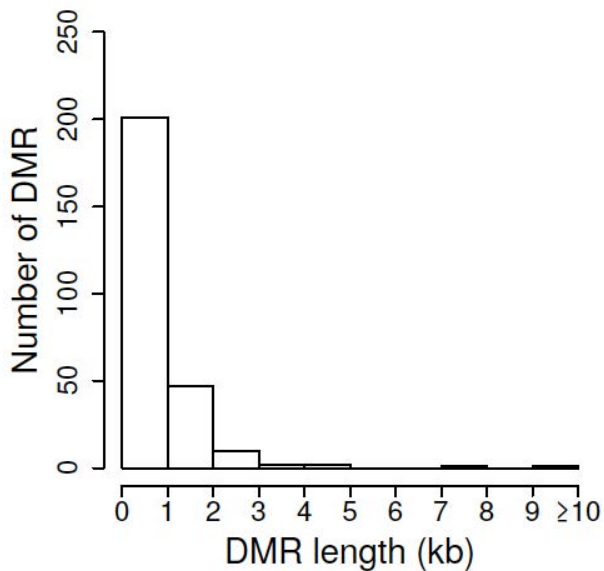**c** DMR CpG density F2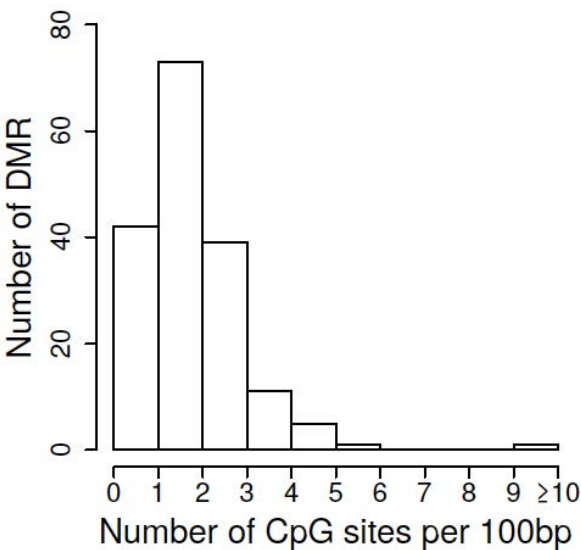**d** DMR length F2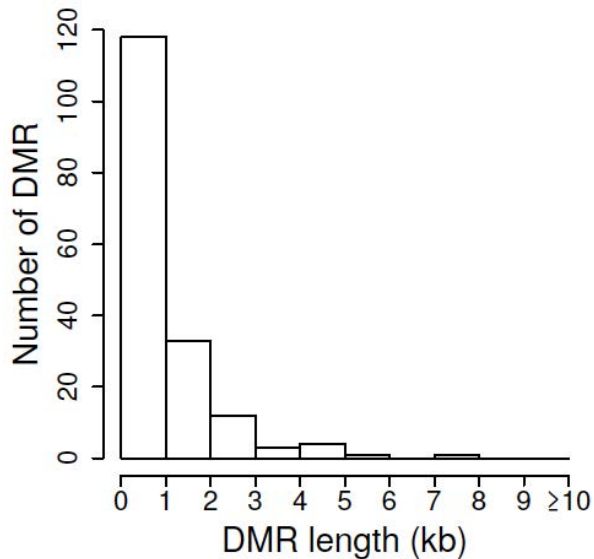**e** DMR CpG density F3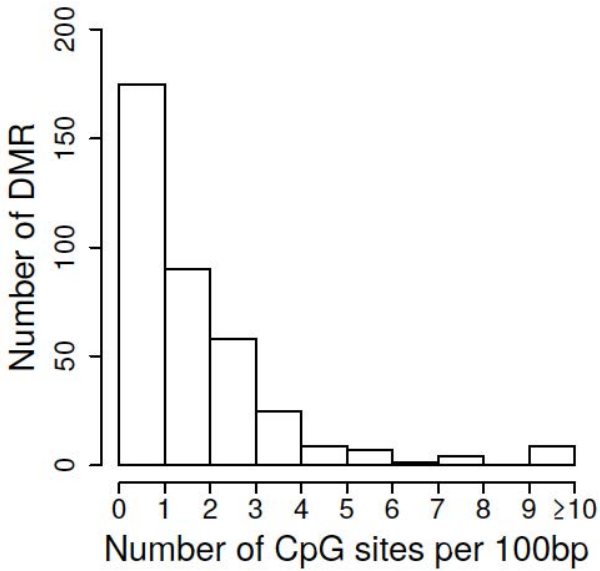**f** DMR length F3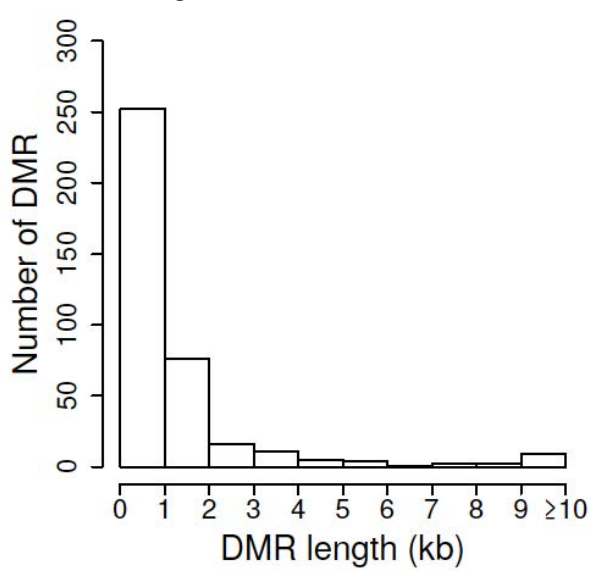

Figure S6

a PCA F1 DMR

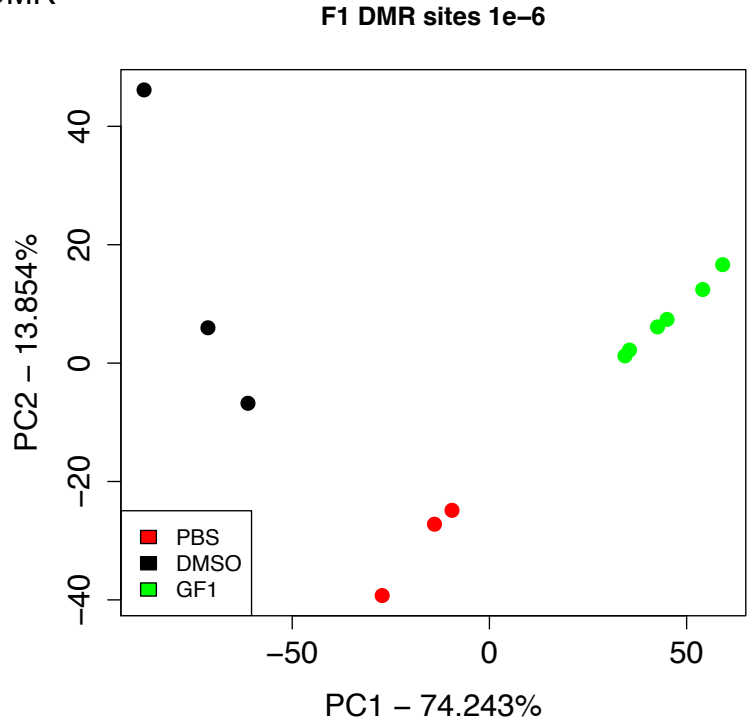

b PCA F2 DMR

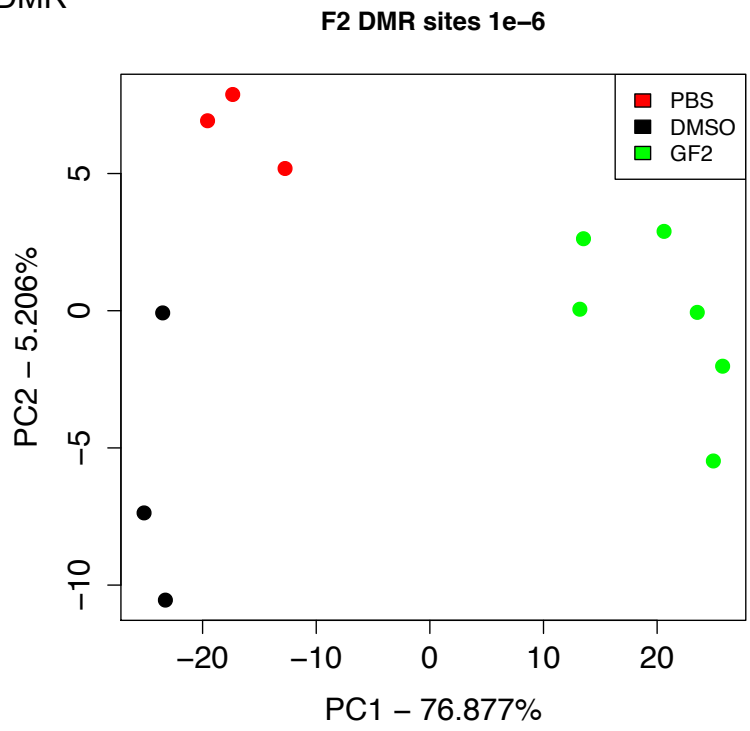

Figure S7

a Normalization obesity frequency of generation offspring to determine lineage effects

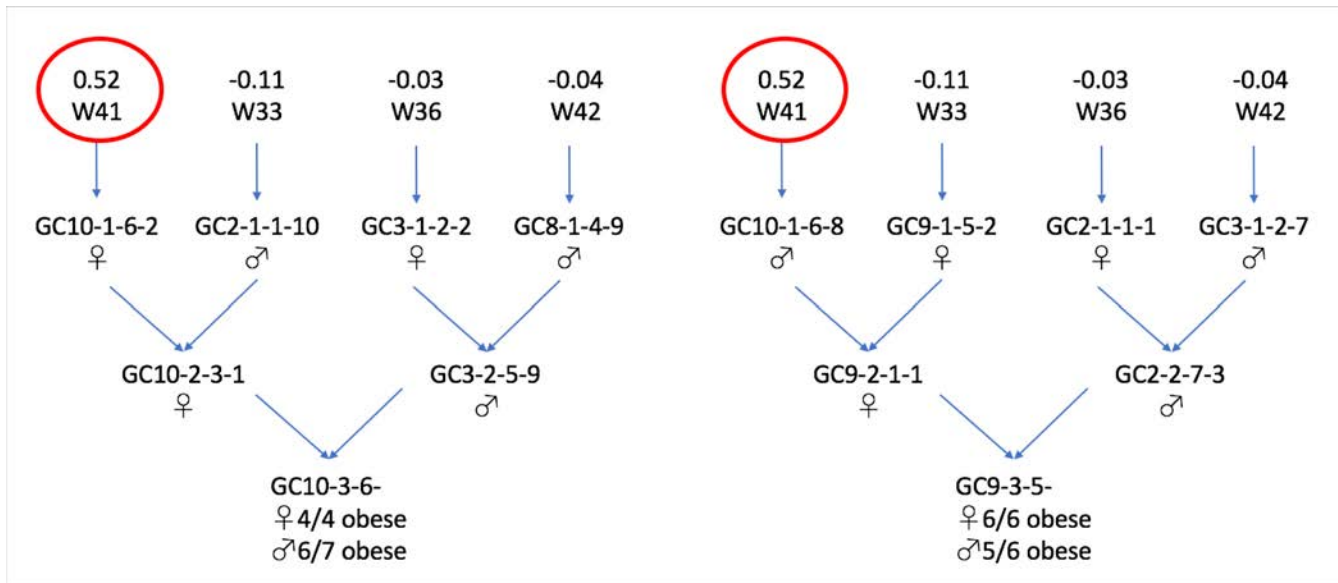

b Founder effect

$f_n$  = normalized frequency of obesity in offspring

$N_L$  = ♂ or ♀ in litter

$N_C$  = # of ♂ or ♀ in colony (controlling for litter size)

$f_l$  = frequency of obesity in litter

$f_c$  = frequency of obesity in colony

$$f_n = \frac{\binom{N_L}{N_C} f_l}{f_c}$$

Lineage based attributed risk =  $\bar{x}(f_n) - \bar{x}(f_c)$

## Supplemental Table S1

### F1 Individual Animal Pathology

#### (A) F1 Generation Glyphosate Males

| Rat ID       | Puberty | Testis | Prostate | Kidney | Tumor | Lean | Obese | Total Disease |
|--------------|---------|--------|----------|--------|-------|------|-------|---------------|
| 15GG1-1-1-6  | -       | -      | -        | -      | -     | +    | -     | 1             |
| 15GG1-1-1-7  | -       | -      | +        | -      | -     | +    | -     | 2             |
| 15GG1-1-1-8  | -       | +      | +        | -      | -     | -    | -     | 2             |
| 15GG1-1-1-9  | -       | -      | -        | -      | -     | -    | -     |               |
| 15GG1-1-1-11 | -       | -      | -        | -      | -     | +    | -     | 1             |
| 15GG1-1-1-12 |         | +      | -        | -      | -     | -    | +     | 2             |
| 15GG1-1-1-13 | -       | -      | +        | +      | -     | +    | -     | 3             |
| 15GG1-1-1-14 |         | -      | -        | +      | -     | +    | -     | 2             |
| 15GG2-1-2-6  | -       | -      | -        | -      | -     | -    | +     | 1             |
| 15GG2-1-2-7  | -       | -      | -        | -      | -     | -    | -     |               |
| 15GG3-1-3-1  |         | -      | -        | +      | -     | -    | +     | 2             |
| 15GG3-1-3-2  |         | -      | -        | -      | -     | -    | -     |               |
| 15GG3-1-3-3  |         | -      | -        | -      | -     | -    | -     |               |
| 15GG3-1-3-4  |         | -      | -        | -      | -     | -    | -     |               |
| 15GG3-1-3-5  |         | -      | -        | -      | -     | -    | +     | 1             |
| 15GG3-1-3-6  |         | -      | -        | +      | -     | -    | -     | 1             |
| 15GG4-1-4-6  |         | +      | -        | +      | -     | -    | +     | 3             |
| 15GG4-1-4-7  | -       | +      | -        | +      | -     | -    | +     | 3             |
| 15GG5-1-5-9  |         | -      | -        | +      | -     | +    | -     | 2             |
| 15GG5-1-5-10 |         | -      | -        | -      | -     | +    | -     | 1             |
| 15GG5-1-5-11 |         | -      | -        | -      | -     | +    | -     | 1             |
| 15GG5-1-5-12 |         | -      | -        | -      | -     | +    | -     | 1             |
| 15GG5-1-5-13 |         | -      | -        | -      | -     | +    | -     | 1             |
| 15GG5-1-5-14 |         | -      | -        | -      | -     | +    | -     | 1             |
| 15GG5-1-5-15 |         | -      | -        | -      | -     | -    | -     |               |
| 15GG6-1-6-5  |         | -      | -        | +      | -     | -    | -     | 1             |
| 15GG6-1-6-6  | +       | -      | +        | +      | -     | -    | -     | 3             |
| 15GG6-1-6-7  | +       | -      | -        | -      | -     | +    | -     | 2             |
| 15GG6-1-6-8  | +       | -      | -        | -      | -     | -    | -     | 1             |
| 15GG6-1-6-9  | +       | -      | -        | -      | -     | +    | -     | 2             |
| 15GG6-1-6-10 | +       | -      | +        | +      | -     | -    | -     | 3             |
| Affected     | 5       | 4      | 5        | 10     | 0     | 13   | 6     |               |
| Population   | 14      | 31     | 31       | 31     | 31    | 31   | 31    |               |

**(B) F1 Generation Control Males**

| Rat ID        | Puberty | Testis | Prostate | Kidney | Tumor | Lean | Obese | Total Disease |
|---------------|---------|--------|----------|--------|-------|------|-------|---------------|
| 15GC2-1-1-9   |         | +      | -        | -      | -     | +    | -     | 2             |
| 15GC2-1-1-10  |         | -      | -        | -      | -     | -    | -     |               |
| 15GC2-1-1-11  |         | -      | -        | -      | -     | -    | -     |               |
| 15GC2-1-1-12  |         | -      | -        | -      | -     | -    | -     |               |
| 15GC2-1-1-13  |         | +      | -        | -      | -     | -    | -     | 1             |
| 15GC3-1-2-7   | -       | -      | -        | -      | -     | -    | +     | 1             |
| 15GC3-1-2-8   | -       | -      | -        | -      | -     | +    | -     | 1             |
| 15GC3-1-2-9   | -       | -      | -        | -      | -     | -    | +     | 1             |
| 15GC3-1-2-10  |         | -      | -        | -      | -     | +    | -     | 1             |
| 15GC3-1-2-11  | -       | -      | -        | -      | -     | -    | -     |               |
| 15GC3-1-2-12  | -       | -      | -        | -      | -     | +    | -     | 1             |
| 15GC3-1-2-14  | -       | -      | -        | -      | -     | +    | -     | 1             |
| 15GC3-1-2-15  | -       | -      | -        | -      | +     | -    | -     | 1             |
| 15GC8-1-4-8   |         | -      | -        | -      | -     | +    | -     | 1             |
| 15GC8-1-4-9   |         | +      | -        | -      | -     | +    | -     | 2             |
| 15GC8-1-4-10  |         | +      | +        | -      | -     | +    | -     | 3             |
| 15GC8-1-4-11  |         | -      | -        | -      | -     | -    | -     |               |
| 15GC8-1-4-12  |         | -      | -        | -      | -     | -    | -     |               |
| 15GC8-1-4-13  |         | +      | -        | -      | -     | +    | -     | 2             |
| 15GC8-1-4-14  |         | +      | -        | -      | -     | +    | -     | 2             |
| 15GC8-1-4-15  |         | +      | +        | -      | -     | +    | -     | 3             |
| 15GC8-1-4-16  |         | -      | -        | -      | -     | +    | -     | 1             |
| 15GC9-1-5-5   |         | -      | -        | +      | -     | -    | -     |               |
| 15GC11-1-7-5  | -       | -      | -        | -      | -     | -    | -     |               |
| AC2-1-2-1     | +       | -      | -        | +      | -     | -    | -     | 2             |
| AC2-1-2-2     | -       | -      | -        | -      | -     | -    | -     |               |
| AC2-1-2-3     | -       | -      | -        | +      | -     | -    | -     | 1             |
| AC2-1-2-4     | -       | -      | -        | -      | -     | -    | -     |               |
| AC2-1-2-5     | -       | -      | -        | -      | -     | -    | -     |               |
| AC3-1-3-1     | -       |        |          |        | -     | -    | +     | 1             |
| AC4-1-4-1     | -       |        |          |        | -     | -    | +     | 1             |
| AC4-1-4-2     | -       |        |          |        | -     | -    | -     |               |
| AC4-1-4-3     | -       |        |          |        | -     | -    | -     |               |
| AC4-1-4-4     | -       |        |          |        | -     | -    | -     |               |
| AC6-1-6-1     | -       | -      | -        | -      | -     | -    | -     |               |
| AC6-1-6-2     | -       |        | +        | +      | -     | -    | -     | 2             |
| AC6-1-6-3     | -       | -      | -        | -      | -     | -    | +     | 1             |
| AC6-1-6-4     |         | +      | +        | +      | -     | +    | -     | 4             |
| AC9-1-4-7     | -       | -      | -        | -      | -     | -    | -     |               |
| AC9-1-4-8     | -       | -      | -        | -      | -     | -    | -     |               |
| 14C10-1-10-7  | -       | -      | -        | -      | -     | -    | +     | 1             |
| 14C10-1-10-8  | -       | -      | -        | -      | -     | -    | +     | 1             |
| 14C10-1-10-9  |         | +      | -        | -      | -     | -    | +     | 2             |
| 14C10-1-10-10 |         | -      | -        | -      | -     | -    | -     |               |
| 14C12-1-3-5   | -       |        |          |        | -     | -    | +     | 1             |
| 14C16-1-6-6   | -       |        |          |        | -     | -    | -     |               |
| 14C17-1-17-4  | -       |        |          |        | -     | -    | -     |               |
| 14C17-1-17-5  | -       |        |          |        | -     | -    | -     |               |
| Affected      | 1       | 9      | 4        | 5      | 1     | 13   | 9     |               |
| Population    | 27      | 38     | 36       | 39     | 48    | 47   | 47    |               |

**(C) F1 Generation Glyphosate Females**

| Rat ID       | Puberty | Ovary | Kidney | Tumor | Lean | Obese | Total Disease |
|--------------|---------|-------|--------|-------|------|-------|---------------|
| 15GG1-1-1-1  |         | -     | -      | -     | +    | -     | 1             |
| 15GG1-1-1-2  |         | +     | -      | -     | -    | -     |               |
| 15GG1-1-1-3  |         | -     | -      | -     | -    | -     |               |
| 15GG1-1-1-4  | -       | +     | -      | -     | +    | -     | 2             |
| 15GG1-1-1-5  | -       | -     | -      | -     | -    | -     |               |
| 15GG1-1-1-10 |         | +     | -      | -     | -    | -     | 1             |
| 15GG2-1-2-1  |         | +     | -      | -     | -    | +     | 2             |
| 15GG2-1-2-2  | -       | -     | -      | -     | -    | +     | 1             |
| 15GG2-1-2-3  | -       | -     | -      | -     | -    | +     | 1             |
| 15GG2-1-2-4  |         | +     | -      | -     | -    | +     | 2             |
| 15GG2-1-2-5  | -       | -     | -      | -     | -    | +     | 1             |
| 15GG4-1-4-1  | -       | -     | -      | -     | -    | -     |               |
| 15GG4-1-4-2  | -       | +     | -      | -     | -    | -     | 1             |
| 15GG4-1-4-3  | -       | -     | +      | -     | -    | -     | 1             |
| 15GG4-1-4-4  | -       | -     | -      | -     | -    | +     | 1             |
| 15GG4-1-4-5  | -       | -     | -      | -     | -    | +     | 1             |
| 15GG5-1-5-1  |         | -     | -      | -     | +    | -     | 1             |
| 15GG5-1-5-2  |         | -     | -      | -     | +    | -     | 1             |
| 15GG5-1-5-3  |         | -     | -      | -     | -    | -     |               |
| 15GG5-1-5-4  |         | -     | -      | -     | +    | -     | 1             |
| 15GG5-1-5-5  |         | -     | -      | -     | +    | -     | 1             |
| 15GG5-1-5-6  |         | -     | -      | -     | +    | -     | 1             |
| 15GG5-1-5-7  |         | -     | -      | -     | +    | -     | 1             |
| 15GG5-1-5-8  |         | -     | -      | -     | -    | -     |               |
| 15GG6-1-6-1  |         | -     | -      | -     |      |       |               |
| 15GG6-1-6-2  | -       | -     | -      | -     | -    | -     |               |
| 15GG6-1-6-3  |         | -     | -      | -     | -    | +     | 1             |
| 15GG6-1-6-4  |         | -     | -      | -     | -    | -     |               |
| Affected     | 0       | 6     | 1      | 0     | 8    | 8     |               |
| Population   | 11      | 28    | 28     | 28    | 27   | 27    |               |



**(D) F1 Generation Control Females**

| Rat ID       | Puberty | Ovary | Kidney | Tumor | Lean | Obese | Total Disease |
|--------------|---------|-------|--------|-------|------|-------|---------------|
| 15GC2-1-1-1  |         | -     | -      | -     | -    | -     |               |
| 15GC2-1-1-2  |         | -     | -      | -     | -    | -     |               |
| 15GC2-1-1-3  |         | -     | -      | -     | -    | -     |               |
| 15GC2-1-1-4  |         | -     | -      | -     | -    | -     |               |
| 15GC2-1-1-5  |         | +     | -      | -     | -    | -     | 1             |
| 15GC3-1-2-1  | -       |       |        | -     |      |       |               |
| 15GC3-1-2-2  | -       | -     | -      | -     | -    | -     |               |
| 15GC3-1-2-3  | -       | -     | +      | -     | -    | -     | 1             |
| 15GC3-1-2-4  | -       | -     | -      | -     | -    | -     |               |
| 15GC3-1-2-5  |         | -     | -      | -     | +    | -     | 1             |
| 15GC6-1-3-1  |         | -     | -      | -     | -    | -     |               |
| 15GC8-1-4-1  |         | -     | -      | -     | +    | -     | 1             |
| 15GC8-1-4-2  |         | -     | -      | -     | -    | -     |               |
| 15GC8-1-4-3  |         | -     | -      | -     | -    | -     |               |
| 15GC8-1-4-4  |         | -     | -      | -     | -    | -     |               |
| 15GC8-1-4-5  |         | +     | -      | -     | -    | -     | 1             |
| 15GC8-1-4-7  |         | -     | -      | -     | -    | -     |               |
| 15GC9-1-5-1  |         | +     | -      | -     | -    | +     | 2             |
| 15GC9-1-5-2  |         | -     | +      | -     | -    | -     | 1             |
| 15GC9-1-5-3  |         | -     | +      | -     | -    | -     | 1             |
| 15GC9-1-5-4  |         | +     | +      | -     | +    | -     | 3             |
| 15GC11-1-7-1 |         |       |        | +     | -    | -     | 1             |
| 15GC11-1-7-2 |         | -     | -      | -     | -    | -     |               |
| 15GC11-1-7-3 |         | -     | -      | -     | -    | -     |               |
| 15GC11-1-7-4 |         | -     | -      | -     | -    | -     |               |
| AC2-1-2-6    | -       | +     | -      | -     | -    | -     | 1             |
| AC2-1-2-7    | -       | -     | -      | -     | +    | -     | 1             |
| AC2-1-2-10   | -       | -     | -      | -     | -    | +     | 1             |
| AC3-1-3-2    | -       | -     | -      | -     | -    | +     | 1             |
| AC3-1-3-3    | -       | -     |        | -     | -    | +     | 1             |
| AC3-1-3-4    | -       | -     | -      | -     | -    | +     | 1             |
| AC3-1-3-6    | -       | -     | +      | -     | -    | -     | 1             |
| AC6-1-6-5    |         | +     | -      | +     | -    | -     | 2             |
| AC9-1-4-1    | -       | -     | -      | +     | -    | -     | 1             |
| AC9-1-4-2    |         | -     |        | -     | -    | -     |               |
| AC9-1-4-3    |         | -     |        | -     | -    | -     |               |
| AC9-1-4-4    |         | -     | -      | -     | -    | -     |               |
| 14C10-1-10-1 | -       | -     | -      | -     | +    | -     | 1             |
| 14C10-1-10-2 | -       | -     | -      | -     | -    | +     | 1             |
| 14C12-1-3-2  | -       |       | -      | -     | -    | -     |               |
| 14C12-1-3-3  | -       | -     | +      | -     | -    | -     | 1             |
| Affected     | 0       | 6     | 6      | 3     | 5    | 6     |               |
| Population   | 16      | 38    | 36     | 41    | 40   | 40    |               |

## Supplemental Table S2

### F2 Individual Animal Pathology

#### (A) F2 Generation Glyphosate Males

| Rat ID       | Puberty | Testis | Prostate | Kidney | Tumor | Lean | Obese | Total Disease |
|--------------|---------|--------|----------|--------|-------|------|-------|---------------|
| 15GG1-2-5-8  | -       | -      | +        | -      | -     | -    | -     | 1             |
| 15GG1-2-5-9  | -       | +      | -        | -      | -     | -    | -     | 1             |
| 15GG1-2-5-10 |         | +      | -        | +      | -     | -    | -     | 2             |
| 15GG1-2-7-6  | -       | +      | -        | -      | -     | -    | -     | 1             |
| 15GG1-2-7-7  | -       | -      | -        | -      | -     | -    | +     | 1             |
| 15GG1-2-7-8  | -       | +      | -        | -      | -     | -    | -     | 1             |
| 15GG1-2-7-9  | -       | -      | -        | -      | -     | -    | -     |               |
| 15GG1-2-7-10 | -       | +      | -        | -      | -     | -    | +     | 2             |
| 15GG2-2-3-6  | +       | +      | -        | -      | -     | -    | +     | 3             |
| 15GG2-2-3-7  | +       | -      | -        | +      | -     | +    | -     | 3             |
| 15GG2-2-3-8  | +       | -      | -        | -      | -     | -    | +     | 2             |
| 15GG2-2-3-9  | +       | +      | -        | -      | -     | -    | +     | 3             |
| 15GG4-2-4-6  |         | +      | -        | -      | -     | -    | +     | 2             |
| 15GG4-2-4-7  |         | -      | -        | +      | -     | -    | +     | 2             |
| 15GG4-2-4-8  |         | +      | -        | +      | -     | -    | -     | 2             |
| 15GG4-2-4-9  |         | +      | -        | -      | -     | -    | +     | 2             |
| 15GG4-2-4-10 |         | -      | -        | -      | -     | -    | +     | 1             |
| 15GG5-2-1-5  |         | +      | +        | +      | -     | -    | -     | 3             |
| 15GG5-2-1-6  |         | -      | -        | +      | -     | -    | -     | 1             |
| 15GG5-2-1-7  |         | +      | -        | +      | -     | -    | +     | 3             |
| 15GG5-2-2-4  |         | -      | -        | -      | -     | -    | -     |               |
| 15GG5-2-2-5  |         | -      | -        | -      | -     | -    | +     | 1             |
| 15GG5-2-2-7  | +       | -      | +        | +      | -     | -    | -     | 3             |
| 15GG5-2-2-8  | +       | +      | -        | -      | -     | +    | -     | 3             |
| 15GG5-2-2-9  | +       | -      | -        | -      | -     | -    | +     | 2             |
| 15GG5-2-2-10 | +       | +      | +        | +      | -     | -    | -     | 4             |
| 15GG6-2-8-2  | +       | -      | -        | +      | -     | -    | -     | 2             |
| 15GG6-2-9-4  | +       | -      | -        | -      | -     | -    | +     | 2             |
| Affected     | 10      | 14     | 4        | 10     | 0     | 2    | 13    |               |
| Population   | 17      | 28     | 28       | 28     | 28    | 28   | 28    |               |

**(B) F2 Generation Control Males**

|               | Puberty | Testis | Prostate | Kidney | Tumor | Lean | Obese | Total Disease |
|---------------|---------|--------|----------|--------|-------|------|-------|---------------|
| Rat ID        |         |        |          |        |       |      |       |               |
| 15GC2-2-6-5   |         | -      | -        | -      | -     | -    | -     |               |
| 15GC2-2-6-6   |         | -      | -        | -      | -     | -    | +     | 1             |
| 15GC2-2-6-7   |         | -      | +        | -      | -     | +    | -     | 2             |
| 15GC2-2-7-3   | -       | +      | -        | -      | -     |      |       | 1             |
| 15GC2-2-7-4   |         | -      | -        | -      | -     |      |       |               |
| 15GC2-2-7-5   | -       | +      | -        | -      | -     |      |       | 1             |
| 15GC3-2-5-8   |         | -      | +        | -      | -     | -    | -     | 1             |
| 15GC3-2-5-9   | -       | -      | -        | +      | -     | -    | -     | 1             |
| 15GC3-2-5-10  |         | -      | -        | -      | -     | -    | -     |               |
| 15GC3-2-5-11  |         | +      | -        | -      | -     | -    | -     | 1             |
| 15GC3-2-5-12  | -       | -      | -        | -      | -     | -    | -     |               |
| 15GC6-2-4-7   | -       | -      | -        | -      | -     | -    | -     |               |
| 15GC6-2-4-8   |         | -      | -        | -      | -     | -    | -     |               |
| 15GC6-2-4-9   | -       | -      | -        | -      | -     | -    | +     | 1             |
| 15GC6-2-4-10  |         | -      | -        | -      | -     | -    | -     |               |
| 15GC10-2-2-10 | -       | -      |          | -      | -     | -    | -     |               |
| 15GC10-2-2-11 | -       | -      |          | -      | -     | -    | -     |               |
| 15GC10-2-2-12 |         | -      |          | -      | -     | -    | +     | 1             |
| 15GC10-2-2-13 |         | +      |          | +      | -     | -    | -     | 2             |
| 15GC10-2-2-14 | -       | -      |          | -      | -     | -    | -     |               |
| 15GC10-2-2-15 | -       | +      |          | -      | -     | +    | -     | 2             |
| 15GC10-2-2-16 | -       | -      |          | -      | -     | -    | -     |               |
| AC2-2-1-6     |         | +      | +        | -      | -     | -    | +     | 3             |
| AC2-2-1-7     |         | +      | -        | -      | -     | +    | -     | 2             |
| AC2-2-3-3     | -       |        |          |        | -     | -    | -     |               |
| AC2-2-10-5    | -       | -      | -        | -      | -     | -    | -     |               |
| AC2-2-10-6    | -       | -      | -        | -      | -     | +    | -     | 1             |
| AC6-2-2-4     |         | -      | -        | -      | -     | -    | -     |               |
| AC6-2-2-5     |         | -      | +        | -      | -     | -    | -     | 1             |
| AC6-2-2-6     | +       | -      | +        | -      | -     | -    | +     | 3             |
| AC6-2-12-6    | -       | -      | -        | -      | +     | -    | -     |               |
| AC6-2-12-7    | -       | -      | -        | -      | -     | -    | -     |               |
| AC9-2-6-4     | -       | -      | -        | -      | -     | -    | -     |               |
| AC9-2-6-5     | -       | -      | -        | -      | -     | -    | -     |               |
| AC9-2-11-3    | -       | -      | -        | -      | -     | -    | +     | 1             |
| 14C10-2-7-4   | -       |        |          |        |       | -    | -     |               |
| 14C10-2-7-5   | -       |        |          |        |       | -    | -     |               |
| Affected      | 1       | 7      | 5        | 2      | 1     | 4    | 6     |               |
| Population    | 22      | 34     | 27       | 34     | 35    | 34   | 34    |               |

**(C) F2 Generation Glyphosate Females**

|             | <b>Puberty</b> | <b>Ovary</b> | <b>Kidney</b> | <b>Tumor</b> | <b>Lean</b> | <b>Obese</b> | <b>Total Disease</b> |
|-------------|----------------|--------------|---------------|--------------|-------------|--------------|----------------------|
| Rat ID      |                |              |               |              |             |              |                      |
| 15GG1-2-5-3 |                |              |               | +            | -           | +            | 2                    |
| 15GG1-2-5-4 |                | +            | -             | -            | -           | +            | 2                    |
| 15GG1-2-5-5 | -              | +            | -             | -            | -           | -            | 1                    |
| 15GG1-2-5-6 | -              | +            | -             | -            | -           | +            | 2                    |
| 15GG1-2-5-7 | -              | +            | -             | -            | -           | +            | 2                    |
| 15GG1-2-7-2 |                | -            | -             | -            | -           | +            | 1                    |
| 15GG1-2-7-3 |                | +            | -             | -            | -           | +            | 2                    |
| 15GG1-2-7-4 | -              | -            | -             | -            | -           | -            |                      |
| 15GG1-2-7-5 |                | -            | -             | -            | -           | +            | 1                    |
| 15GG2-2-3-2 |                | +            | -             | -            | -           | -            | 1                    |
| 15GG2-2-3-3 |                | -            | -             | -            | -           | +            | 1                    |
| 15GG2-2-3-4 |                | -            | -             | -            | -           | +            | 1                    |
| 15GG2-2-3-5 |                | +            | -             | -            | -           | +            | 2                    |
| 15GG2-2-6-1 |                | -            | -             | +            | -           | -            | 1                    |
| 15GG2-2-6-2 |                | +            | -             | -            | -           | -            | 1                    |
| 14GG4-2-4-1 |                | +            | -             | -            | -           | -            | 1                    |
| 14GG4-2-4-2 |                | -            | +             | -            | -           | -            | 1                    |
| 14GG4-2-4-3 |                | -            | -             | -            | -           | +            | 1                    |
| 14GG4-2-4-4 |                | -            | -             | -            | -           | -            |                      |
| 14GG4-2-4-5 |                | -            | +             | -            | -           | +            | 2                    |
| 15GG5-2-1-1 | +              | -            | -             | -            | -           | +            | 2                    |
| 15GG5-2-1-2 | +              | -            | -             | -            | -           | -            | 1                    |
| 15GG5-2-1-3 | +              | -            | -             | -            | -           | -            | 1                    |
| 15GG5-2-1-4 | +              | -            | -             | -            | -           | -            | 1                    |
| 15GG5-2-2-1 | +              | +            | -             | -            | +           | -            | 3                    |
| 15GG5-2-2-2 | +              | +            | -             | -            | -           | -            | 2                    |
| 15GG5-2-2-3 | +              | +            | +             | -            | -           | -            | 3                    |
| 15GG6-2-8-1 | -              | -            | +             | -            | -           | -            | 1                    |
| 15GG6-2-9-1 |                | +            | -             | +            | -           | -            | 2                    |
| 15GG6-2-9-3 | -              | +            | -             | -            | -           | +            | 2                    |
| Affected    | 7              | 14           | 4             | 3            | 1           | 14           |                      |
| Population  | 13             | 29           | 29            | 30           | 30          | 30           |                      |

**(D) F2 Generation Control Females**

|              | <b>Puberty</b> | <b>Ovary</b> | <b>Kidney</b> | <b>Tumor</b> | <b>Lean</b> | <b>Obese</b> | <b>Total Disease</b> |
|--------------|----------------|--------------|---------------|--------------|-------------|--------------|----------------------|
| Rat ID       |                |              |               |              |             |              |                      |
| 15GC10-2-2-1 |                | +            | -             | -            | +           | -            | <b>2</b>             |
| 15GC10-2-2-2 | -              | -            | +             | -            | +           | -            | <b>2</b>             |
| 15GC10-2-2-3 | -              | -            | -             | +            | -           | -            | <b>1</b>             |
| 15GC10-2-2-4 | -              | -            | -             | -            | -           | -            |                      |
| 15GC10-2-2-5 | -              | -            | -             | -            | -           | -            |                      |
| 15GC10-2-2-6 | -              | -            | -             | -            | -           | -            |                      |
| 15GC10-2-2-7 | -              | -            | -             | -            | -           | +            | <b>1</b>             |
| 15GC10-2-2-8 | -              | -            | -             | -            | +           | -            | <b>1</b>             |
| 15GC10-2-2-9 | -              | -            | -             | -            | -           | -            |                      |
| 15GC2-2-6-1  |                | +            | -             | -            | -           | -            | <b>1</b>             |
| 15GC2-2-6-2  | +              | -            | -             | -            | -           | -            | <b>1</b>             |
| 15GC2-2-6-3  | +              | -            | -             | -            | +           | -            | <b>2</b>             |
| 15GC2-2-6-4  |                | -            | -             | -            | -           | -            |                      |
| 15GC2-2-7-1  |                | -            | -             | -            |             |              |                      |
| 15GC2-2-7-2  |                | +            | -             | -            |             |              | <b>1</b>             |
| 15GC3-2-5-1  |                |              | +             | -            |             |              | <b>1</b>             |
| 15GC3-2-5-2  |                | -            | +             | -            | -           | -            | <b>1</b>             |
| 15GC3-2-5-3  |                | -            | -             | -            | -           | -            |                      |
| 15GC3-2-5-4  |                | -            | +             | -            | -           | -            | <b>1</b>             |
| 15GC3-2-5-5  |                | +            | -             | -            | -           | -            | <b>1</b>             |
| 15GC3-2-5-6  |                | -            | -             | -            | -           | -            |                      |
| 15GC3-2-5-7  |                | +            | -             | -            | -           | -            | <b>1</b>             |
| 15GC6-2-4-1  | -              | -            | -             | -            | +           | -            | <b>1</b>             |
| 15GC6-2-4-2  |                | -            | -             | -            | -           | +            | <b>1</b>             |
| 15GC6-2-4-3  |                | -            | -             | -            | -           | -            |                      |
| 15GC6-2-4-4  |                | -            | -             | -            | -           | -            |                      |
| 15GC6-2-4-5  | -              | -            | -             | -            | -           | -            |                      |
| 15GC6-2-4-6  |                | -            | -             | -            | -           | -            |                      |
| AC2-2-1-1    | -              | -            | +             | -            | -           | -            | <b>1</b>             |
| AC2-2-1-3    | -              | -            | -             | -            | -           | -            |                      |
| AC2-2-1-4    | -              | -            | -             | -            | -           | +            | <b>1</b>             |
| AC6-2-2-1    | -              | +            | +             | -            | -           | -            | <b>2</b>             |
| AC6-2-2-2    | -              | -            | -             | -            | -           | -            |                      |
| AC6-2-2-3    | -              | -            | -             | -            | -           | -            |                      |
| AC2-2-3-1    | -              | -            | -             | -            | -           | +            | <b>1</b>             |
| AC2-2-3-2    | -              | -            | -             | -            | -           | -            |                      |
| AC9-2-6-1    |                | +            | +             | -            | -           | -            | <b>2</b>             |
| AC9-2-6-2    | -              | -            | -             | -            | +           | -            | <b>1</b>             |
| AC9-2-6-3    | -              | -            | -             | -            | -           | +            | <b>1</b>             |
| 14C10-2-7-1  | -              | -            | -             | -            | -           | -            |                      |

|             |    |    |    |    |    |    |          |
|-------------|----|----|----|----|----|----|----------|
| 14C10-2-7-2 | -  | -  | -  | -  | -  | -  |          |
| 14C10-2-7-3 | -  | -  | -  | -  | -  | -  |          |
| 14C10-2-8-1 | -  |    | -  | -  | -  | -  |          |
| 14C10-2-8-2 | -  | +  | -  | -  | -  | -  | <b>1</b> |
| 14C10-2-8-3 | -  | -  | -  | -  | -  | +  | <b>1</b> |
| AC9-2-11-1  | -  | +  | -  | -  | -  | -  | <b>1</b> |
| AC9-2-11-2  | -  | -  | -  | -  | -  | -  |          |
| AC6-2-12-1  | -  | -  | -  | -  | -  | -  |          |
| AC6-2-12-2  | -  | -  | -  | -  | -  | -  |          |
| AC6-2-12-3  |    | +  | -  | -  | -  | -  | <b>1</b> |
| Affected    | 2  | 10 | 7  | 1  | 6  | 6  |          |
| Population  | 32 | 48 | 50 | 50 | 47 | 47 |          |

### Supplemental Table S3

#### F3 Individual Animal Pathology

##### (A) F3 Generation Glyphosate Males

| Rat ID       | Puberty | Testis | Prostate | Kidney | Tumor | Lean | Obese | Total Disease |
|--------------|---------|--------|----------|--------|-------|------|-------|---------------|
| 15GG1-3-2-7  |         | -      | -        | -      | -     | -    | +     | 1             |
| 15GG1-3-2-8  |         | -      | -        | -      | -     | -    | +     | 1             |
| 15GG1-3-2-9  |         | -      | +        | -      | -     | -    | -     | 1             |
| 15GG1-3-2-10 |         | +      | -        | -      | -     | -    | -     | 1             |
| 15GG1-3-6-4  | -       | -      | -        | -      | -     | -    | +     |               |
| 15GG1-3-6-5  | -       | +      | -        | +      | -     | -    | +     | 3             |
| 15GG1-3-6-6  | -       | -      | -        | -      | -     | -    | +     | 1             |
| 15GG1-3-6-7  | -       | -      | -        | +      | -     | -    | -     | 1             |
| 15GG1-3-6-8  | -       | -      | +        | -      | -     | -    | -     | 1             |
| 15GG2-3-8-3  | -       | -      | -        | -      | -     | -    | -     |               |
| 15GG2-3-8-4  | -       | -      | -        | -      | -     | -    | -     |               |
| 15GG2-3-8-5  | -       | -      | -        | -      | -     | -    | +     | 1             |
| 15GG2-3-8-6  | -       | +      | +        | -      | -     | -    | -     | 2             |
| 15GG2-3-8-7  | -       | -      | -        | +      | -     | -    | -     | 1             |
| 15GG2-3-8-8  | -       | -      | +        | -      | -     | -    | -     | 1             |
| 15GG4-3-4-4  | -       | -      | -        | -      | -     | -    | +     | 1             |
| 15GG4-3-4-5  | -       | -      | -        | +      | -     | -    | -     | 1             |
| 15GG4-3-4-6  | -       | -      | -        | -      | -     | -    | -     |               |
| 15GG4-3-4-7  | -       | +      | -        | +      | -     | -    | +     | 3             |
| 15GG4-3-4-8  | -       | +      | +        | +      | -     | -    | -     | 3             |
| 15GG4-3-4-9  | -       | +      | -        | +      | -     | -    | +     | 3             |
| 15GG4-3-4-10 |         |        |          |        | +     |      |       | 1             |
| 15GG4-3-4-11 |         |        |          |        |       | -    | +     | 1             |
| 15GG5-3-1-6  |         | -      | -        | -      | -     | -    | +     | 1             |
| 15GG5-3-1-7  | -       | -      | -        | +      | -     | -    | -     | 1             |
| 15GG5-3-1-8  | -       | +      | -        | +      | -     | -    | -     | 2             |
| 15GG5-3-1-9  |         | -      | -        | -      | -     | -    | +     | 1             |
| 15GG5-3-1-10 | -       | -      | -        | -      | -     | -    | -     |               |
| 15GG5-3-7-6  | -       | -      | +        | +      | -     | -    | +     | 3             |
| 15GG5-3-7-7  | -       | -      | -        | -      | -     | -    | +     | 1             |
| 15GG5-3-9-4  | -       | -      | +        | -      | -     | -    | +     | 2             |
| 15GG5-3-9-5  | -       | -      | +        | -      | -     | -    | +     | 2             |
| 15GG6-3-3-6  | -       | -      | -        | -      | -     | -    | -     |               |
| 15GG6-3-3-7  | -       | +      | -        | -      | -     | -    | -     | 1             |
| 15GG6-3-3-8  | -       | -      | -        | -      | -     | -    | -     |               |
| 15GG6-3-3-9  | -       | -      | -        | -      | -     | -    | +     | 1             |
| 15GG6-3-3-10 | -       | -      | +        | -      | -     | -    | -     | 1             |
| 15GG6-3-3-11 |         | -      | -        | -      | -     | -    | -     |               |
| 15GG6-3-5-4  | -       | -      | -        | -      | -     | -    | -     |               |
| 15GG6-3-5-5  | -       | -      | -        | -      | -     | -    | +     | 1             |
| 15GG6-3-5-6  | -       | -      | +        | -      | +     | -    | -     | 2             |
| 15GG6-3-5-7  | -       | -      | +        | -      | -     | -    | -     | 1             |
| 15GG6-3-5-8  | -       | -      | +        | -      | -     | -    | -     | 1             |
| 15GG6-3-5-9  | -       | -      | -        | -      | -     | -    | +     | 1             |
| 15GG6-3-5-10 | -       | -      | -        | +      | -     | -    | -     | 1             |
| 15GG6-3-5-11 | -       | -      | +        | -      | -     | -    | -     | 1             |
| Affected     | 0       | 8      | 13       | 11     | 2     | 0    | 19    |               |
| Population   | 37      | 44     | 44       | 44     | 45    | 45   | 45    |               |

**(B) F3 Generation Control Males**

|               | Puberty | Testis | Prostate | Kidney | Tumor | Lean | Obese | Total Disease |
|---------------|---------|--------|----------|--------|-------|------|-------|---------------|
| Rat ID        |         |        |          |        |       |      |       |               |
| 15GC10-3-1-10 | -       | -      | +        | -      | -     | -    | -     | 1             |
| 15GC10-3-1-7  | +       | -      | -        | -      | +     | +    | -     | 3             |
| 15GC10-3-1-8  | +       | -      | +        | -      | -     | -    | -     | 2             |
| 15GC10-3-1-9  | -       | -      | -        | -      | -     | -    | -     |               |
| 15GC3-3-2-7   | -       | -      | -        | -      | -     | -    | -     |               |
| 15GC3-3-2-8   | -       | -      | -        | +      | -     | +    | -     | 2             |
| 15GC3-3-3-7   | -       | +      | -        | -      | -     | -    | +     | 2             |
| 15GC3-3-3-8   | -       | -      | +        | -      | -     | -    | -     | 1             |
| 15GC3-3-3-9   | -       | -      | -        | -      | -     | -    | -     |               |
| 15GC3-3-3-10  | -       | +      | -        | -      | -     | -    | +     | 2             |
| 15GC6-3-4-7   | -       | -      | -        | -      | -     | -    | -     |               |
| 15GC6-3-4-8   | -       | -      | -        | +      | -     | -    | +     | 2             |
| 15GC6-3-4-9   | -       | -      | -        | -      | -     | -    | -     |               |
| 15GC6-3-7-4   |         | -      | -        | +      | -     | -    | +     | 2             |
| 15GC6-3-7-5   | -       | -      | -        | -      | -     | -    | +     | 1             |
| AC2-3-3-9     | -       | -      | -        | -      | -     | -    | -     |               |
| AC2-3-3-10    | -       |        |          |        |       | -    | -     |               |
| AC6-3-1-4     | -       | -      | -        | -      | -     | -    | -     |               |
| AC6-3-1-5     | -       | -      | -        | -      | -     | -    | -     |               |
| AC6-3-1-6     | -       | -      | -        | -      | -     | -    | -     |               |
| AC6-3-6-8     | -       | -      | -        | -      | -     | -    | -     |               |
| AC6-3-6-9     | -       | -      | -        | +      | -     | -    | -     | 1             |
| AC9-3-4-8     | -       | -      | -        | -      | -     | -    | -     |               |
| AC9-3-4-9     | -       | -      | -        | -      | -     | -    | -     |               |
| AC9-3-4-10    |         | -      | -        | -      | -     | -    | -     |               |
| AC9-3-5-8     | -       | -      | -        | -      | -     | -    | +     | 1             |
| AC9-3-5-9     | -       | -      | -        | -      | -     | -    | -     |               |
| 14C10-3-2-8   | -       | -      | -        | -      | -     | -    | -     |               |
| 14C10-3-2-9   | -       | -      | -        | -      | -     | -    | -     |               |
| 14C10-3-2-10  | -       | -      | -        | -      | -     | -    | -     |               |
| 14C10-3-3-8   | -       | -      | -        | -      | -     | -    | -     |               |
| 14C10-3-3-9   | -       |        | -        | +      | -     | +    | -     | 2             |
| 14C10-3-3-10  | -       |        | -        | -      | -     | -    | -     |               |
| Affected      | 2       | 2      | 3        | 5      | 1     | 3    | 6     |               |
| Population    | 31      | 30     | 32       | 32     | 32    | 33   | 33    |               |



**(C) F3 Generation Glyphosate Females**

| Rat ID      | Puberty | Ovary | Kidney | Tumor | Lean | Obese | Total Disease |
|-------------|---------|-------|--------|-------|------|-------|---------------|
| 15GG1-3-2-1 | -       | +     | -      | -     | -    | -     | 1             |
| 15GG1-3-2-2 | -       | +     | -      | +     | -    | +     | 3             |
| 15GG1-3-2-3 | -       | +     | -      | +     | -    | +     | 3             |
| 15GG1-3-2-4 |         | -     | -      | -     | -    | -     |               |
| 15GG1-3-2-5 |         | +     | -      | -     | -    | +     | 2             |
| 15GG1-3-2-6 |         | +     | -      | -     | -    | -     | 1             |
| 15GG1-3-6-1 |         | +     | -      | -     | +    | -     | 2             |
| 15GG1-3-6-2 |         | -     | +      | -     | -    | +     | 2             |
| 15GG1-3-6-3 |         | -     | -      | -     | -    | +     | 1             |
| 15GG2-3-8-1 | -       | +     | +      | -     | -    | +     | 3             |
| 15GG2-3-8-2 | -       | +     | +      | -     | -    | -     | 2             |
| 15GG4-3-4-1 | -       | -     | -      | -     |      |       |               |
| 15GG4-3-4-2 | -       | -     | +      | -     | -    | -     | 1             |
| 15GG4-3-4-3 |         | -     | +      | -     | -    | -     | 1             |
| 15GG5-3-1-1 |         | -     | +      | -     | -    | +     | 2             |
| 15GG5-3-1-2 |         | +     | -      | -     | -    | +     | 2             |
| 15GG5-3-1-3 |         | -     | -      | -     | -    | -     |               |
| 15GG5-3-1-4 |         | +     | -      | -     | -    | -     | 1             |
| 15GG5-3-1-5 |         | -     | -      | -     | -    | +     | 1             |
| 15GG5-3-7-1 | -       | -     | -      | -     | -    | -     |               |
| 15GG5-3-7-2 |         | -     | -      | -     |      |       |               |
| 15GG5-3-7-3 | -       | -     | +      | +     | -    | -     | 2             |
| 15GG5-3-7-4 |         | -     | +      | -     | -    | +     | 2             |
| 15GG5-3-7-5 | -       | +     | -      | -     | -    | -     | 1             |
| 15GG5-3-9-1 |         | -     |        | -     | -    | -     |               |
| 15GG5-3-9-2 |         | -     |        | -     | -    | +     | 1             |
| 15GG5-3-9-3 |         | -     |        | -     | -    | -     |               |
| 15GG6-3-3-1 | -       | -     | -      | -     | -    | -     |               |
| 15GG6-3-3-2 |         | -     | +      | -     | -    | +     | 2             |
| 15GG6-3-3-3 | -       | -     | +      | -     | +    | -     | 2             |
| 15GG6-3-5-1 | -       | -     | +      | -     | -    | -     | 1             |
| 15GG6-3-5-2 | -       | -     | +      | +     |      |       | 2             |
| 15GG6-3-5-3 | -       | +     |        | -     | -    | -     | 1             |
| Affected    | 0       | 12    | 12     | 4     | 2    | 12    |               |
| Population  | 15      | 33    | 29     | 33    | 30   | 30    |               |

**(D) F3 Generation Control Females**

|              | <b>Puberty</b> | <b>Ovary</b> | <b>Kidney</b> | <b>Tumor</b> | <b>Lean</b> | <b>Obese</b> | <b>Total Disease</b> |
|--------------|----------------|--------------|---------------|--------------|-------------|--------------|----------------------|
| Rat ID       |                |              |               |              |             |              |                      |
| 15GC10-3-1-2 | -              | -            | -             | +            |             |              | <b>1</b>             |
| 15GC10-3-1-3 |                | -            | -             | -            | +           | -            | <b>1</b>             |
| 15GC10-3-1-4 | -              | +            | +             | -            | +           | -            | <b>3</b>             |
| 15GC10-3-1-5 | -              | -            | -             | -            | +           | -            | <b>1</b>             |
| 15GC10-3-1-6 | -              | +            | -             | -            | -           | -            | <b>1</b>             |
| 15GC3-3-2-1  |                | -            | +             | -            | +           | -            | <b>2</b>             |
| 15GC3-3-2-2  |                | -            | -             | -            | -           | -            |                      |
| 15GC3-3-2-3  |                | -            | +             | -            | +           | -            | <b>2</b>             |
| 15GC3-3-2-4  |                | -            | +             | -            | -           | +            | <b>2</b>             |
| 15GC3-3-2-5  |                | -            | -             | -            | -           | +            | <b>1</b>             |
| 15GC3-3-2-6  | -              | +            | -             | -            | +           | -            | <b>2</b>             |
| 15GC3-3-3-1  |                | +            | -             | -            | -           | -            | <b>1</b>             |
| 15GC3-3-3-3  |                | -            | -             | -            | -           | -            |                      |
| 15GC3-3-3-4  |                | -            | -             | -            | +           | -            | <b>1</b>             |
| 15GC3-3-3-5  |                | -            | -             | -            | -           | -            |                      |
| 15GC3-3-3-6  |                | -            | -             | -            | +           | -            | <b>1</b>             |
| 15GC6-3-4-1  |                | -            | -             | -            | -           | +            | <b>1</b>             |
| 15GC6-3-4-2  | -              | -            | -             | -            | -           | -            |                      |
| 15GC6-3-4-3  |                | -            | -             | -            | -           | +            | <b>1</b>             |
| 15GC6-3-4-4  |                | -            | -             | +            | +           | -            | <b>2</b>             |
| 15GC6-3-4-5  |                | -            | -             | -            | +           | -            | <b>1</b>             |
| 15GC6-3-4-6  | -              | -            | -             | -            | -           | -            |                      |
| 15GC6-3-7-1  | -              | -            | -             | -            | -           | -            |                      |
| 15GC6-3-7-2  | -              | -            | -             | -            | -           | +            | <b>1</b>             |
| 15GC6-3-7-3  | -              | -            | -             | -            | -           | -            |                      |
| 15GC6-3-7-4  | -              | -            | -             | -            | -           | -            |                      |
| AC6-3-1-7    | -              | -            | -             | -            | -           | -            |                      |
| AC6-3-1-8    |                | +            | -             | -            | -           | -            | <b>1</b>             |
| AC2-3-3-1    | -              | -            | -             | -            | -           | -            |                      |
| AC2-3-3-2    | -              | +            | -             | -            | -           | -            | <b>1</b>             |
| AC2-3-3-3    | -              | -            | -             | -            | -           | -            |                      |
| AC2-3-3-4    | -              | -            | -             | -            | -           | -            |                      |
| AC2-3-3-5    | -              | -            | -             | +            | -           | -            | <b>1</b>             |
| AC6-3-6-1    |                | -            | -             | -            | -           | -            |                      |
| AC6-3-6-2    |                | -            | -             | -            | -           | -            |                      |
| AC6-3-6-3    |                | -            | -             | -            | -           | -            |                      |
| AC6-3-6-4    |                | -            | -             | -            | -           | -            |                      |
| AC6-3-6-5    |                | +            | -             | -            | -           | -            | <b>1</b>             |
| AC2-3-7-1    | -              | -            | -             | -            | -           | -            |                      |
| AC2-3-7-2    |                | -            | -             | -            | -           | -            |                      |
| AC9-3-5-1    | -              | -            | -             | -            | -           | -            |                      |
| AC9-3-5-2    | -              | -            | -             | -            | -           | -            |                      |

|             |    |    |    |    |    |    |          |
|-------------|----|----|----|----|----|----|----------|
| AC9-3-5-3   | -  | -  | -  | -  | -  | -  |          |
| AC9-3-5-4   | -  | -  | -  | -  | -  | -  |          |
| AC9-3-4-1   | -  | -  | -  | -  | -  | -  |          |
| AC9-3-4-2   | -  | -  | -  | -  | -  | -  |          |
| AC9-3-4-3   | -  | -  | -  | -  | -  | -  |          |
| AC9-3-4-4   |    |    | -  | -  | +  | -  | <b>1</b> |
| 14C10-3-2-1 | -  | -  | +  | -  | -  | -  | <b>1</b> |
| 14C10-3-2-2 | -  | -  | -  | -  | -  | -  |          |
| 14C10-3-2-3 | -  | -  | -  | -  | -  | -  |          |
| 14C10-3-2-4 | -  | +  | -  | -  | -  | -  | <b>1</b> |
| 14C10-3-3-1 | -  | -  | -  | -  | -  | -  |          |
| 14C10-3-3-2 | -  | -  | -  | -  | -  | -  |          |
| 14C10-3-3-3 | -  | -  | -  | -  | -  | -  |          |
| 14C10-3-3-4 | -  |    |    | -  | -  | -  |          |
| Affected    | 0  | 8  | 5  | 3  | 11 | 5  |          |
| Population  | 33 | 53 | 52 | 56 | 55 | 55 |          |

**Supplemental Table S4**  
**Site Table F1 Generation DMRs p<1e-06**

| DMR Name       | Chr | Start     | Length | # Sig Win | min P-value | Exp/Con Ratio | CpG # | CpG Density | Annotation         | Category      |
|----------------|-----|-----------|--------|-----------|-------------|---------------|-------|-------------|--------------------|---------------|
| DMR1:14808401  | 1   | 14808401  | 500    | 1         | 5.90E-07    | 2.0642        | 2     | 0.4         | Olig3              | Transcription |
| DMR1:22881501  | 1   | 22881501  | 800    | 1         | 1.55E-07    | 1.6707        | 14    | 1.75        |                    |               |
| DMR1:29563601  | 1   | 29563601  | 400    | 1         | 1.15E-07    | 0.149         | 7     | 1.75        |                    |               |
| DMR1:62806601  | 1   | 62806601  | 200    | 1         | 6.15E-07    | 0             | 0     | 0           | LOC682419          |               |
| DMR1:79353601  | 1   | 79353601  | 700    | 1         | 9.07E-07    | 0             | 1     | 0.1429      | LOC102557244       |               |
| DMR1:79516201  | 1   | 79516201  | 700    | 1         | 7.04E-07    | 0.2361        | 26    | 3.7143      |                    |               |
| DMR1:95086001  | 1   | 95086001  | 1700   | 1         | 1.86E-07    | 2.951         | 20    | 1.1765      |                    |               |
| DMR1:133679901 | 1   | 133679901 | 200    | 2         | 3.18E-09    | 0.1207        | 1     | 0.5         |                    |               |
| DMR1:143945801 | 1   | 143945801 | 600    | 1         | 9.59E-07    | 2.1366        | 11    | 1.8333      |                    |               |
| DMR1:163672001 | 1   | 163672001 | 300    | 1         | 9.93E-08    | 2.421         | 2     | 0.6667      | Thap12             |               |
| DMR1:171333401 | 1   | 171333401 | 500    | 1         | 5.56E-07    | 2.1914        | 8     | 1.6         | Nlrp14             |               |
| DMR1:182463701 | 1   | 182463701 | 1300   | 1         | 7.97E-07    | 1.5394        | 29    | 2.2308      |                    |               |
| DMR1:186237801 | 1   | 186237801 | 200    | 1         | 7.09E-07    | 0.0173        | 0     | 0           |                    |               |
| DMR1:192158101 | 1   | 192158101 | 300    | 1         | 6.23E-07    | 1.6606        | 4     | 1.3333      |                    |               |
| DMR1:201292301 | 1   | 201292301 | 2300   | 1         | 3.33E-11    | 3.5608        | 60    | 2.6087      | Tacc2              | Unknown       |
| DMR1:213567401 | 1   | 213567401 | 200    | 1         | 6.48E-08    | 0             | 1     | 0.5         | RGD1309350         |               |
| DMR1:225255401 | 1   | 225255401 | 900    | 1         | 8.29E-08    | 1.9028        | 22    | 2.4444      |                    |               |
| DMR1:268129001 | 1   | 268129001 | 1200   | 1         | 3.46E-08    | 1.58          | 8     | 0.6667      |                    |               |
| DMR1:273940501 | 1   | 273940501 | 400    | 1         | 7.44E-07    | 2.2863        | 11    | 2.75        | Add3               | Cytoskeleton  |
| DMR1:275355901 | 1   | 275355901 | 100    | 1         | 8.65E-07    | 0             | 0     | 0           |                    |               |
| DMR2:11064401  | 2   | 11064401  | 500    | 1         | 2.79E-08    | 0.2535        | 9     | 1.8         |                    |               |
| DMR2:25279801  | 2   | 25279801  | 1400   | 1         | 2.80E-07    | 1.5462        | 19    | 1.3571      |                    |               |
| DMR2:26975901  | 2   | 26975901  | 700    | 1         | 2.65E-07    | 2.5798        | 15    | 2.1429      |                    |               |
| DMR2:28599401  | 2   | 28599401  | 800    | 1         | 3.74E-07    | 2.0397        | 8     | 1           | RF00026            |               |
| DMR2:77540201  | 2   | 77540201  | 1400   | 1         | 6.78E-08    | 0.3318        | 7     | 0.5         |                    |               |
| DMR2:77685801  | 2   | 77685801  | 600    | 1         | 4.06E-07    | 1.5951        | 7     | 1.1667      |                    |               |
| DMR2:159149301 | 2   | 159149301 | 800    | 1         | 1.32E-07    | 2.5983        | 13    | 1.625       |                    |               |
| DMR2:160647201 | 2   | 160647201 | 700    | 2         | 2.68E-07    | 1.7219        | 15    | 2.1429      |                    |               |
| DMR2:161034201 | 2   | 161034201 | 1600   | 1         | 2.44E-07    | 1.5672        | 36    | 2.25        |                    |               |
| DMR2:162203601 | 2   | 162203601 | 1300   | 1         | 6.99E-07    | 1.8197        | 26    | 2           |                    |               |
| DMR2:165806001 | 2   | 165806001 | 900    | 2         | 7.94E-08    | 1.6251        | 1     | 0.1111      | RGD1563962;RF00420 | Signaling     |
| DMR2:203369601 | 2   | 203369601 | 400    | 1         | 3.05E-10    | 3.3053        | 3     | 0.75        | Cd101              |               |
| DMR2:208204701 | 2   | 208204701 | 500    | 1         | 7.39E-08    | 1.6141        | 2     | 0.4         | Rap1a              | Signaling     |
| DMR2:224665601 | 2   | 224665601 | 200    | 1         | 2.09E-07    | 0             | 0     | 0           |                    |               |
| DMR2:227444301 | 2   | 227444301 | 7400   | 11        | 6.46E-11    | 1.4553        | 6     | 0.0811      | Sec24d             | Transport     |
| DMR2:249422801 | 2   | 249422801 | 400    | 1         | 3.35E-10    | 0.2689        | 4     | 1           |                    |               |
| DMR2:258034401 | 2   | 258034401 | 1600   | 1         | 6.47E-07    | 1.8407        | 17    | 1.0625      | St6galnac5         | Metabolism    |
| DMR2:260211901 | 2   | 260211901 | 1200   | 1         | 5.40E-07    | 2.0524        | 12    | 1           |                    |               |
| DMR3:11174401  | 3   | 11174401  | 500    | 1         | 1.66E-07    | 1.987         | 22    | 4.4         |                    |               |
| DMR3:36093401  | 3   | 36093401  | 300    | 1         | 5.80E-08    | 0.2825        | 3     | 1           |                    |               |
| DMR3:41242701  | 3   | 41242701  | 200    | 1         | 2.31E-07    | 0.0287        | 3     | 1.5         |                    |               |
| DMR3:65081501  | 3   | 65081501  | 600    | 1         | 5.52E-07    | 1.8224        | 3     | 0.5         |                    |               |
| DMR3:70236001  | 3   | 70236001  | 300    | 1         | 9.23E-07    | 1.7671        | 15    | 5           |                    |               |
| DMR3:76511401  | 3   | 76511401  | 200    | 2         | 2.02E-08    | 0.0144        | 0     | 0           | Olr623             | Receptor      |
| DMR3:83192101  | 3   | 83192101  | 1000   | 1         | 7.66E-07    | 1.5443        | 9     | 0.9         | Ttc17              | Unknown       |
| DMR3:118675601 | 3   | 118675601 | 400    | 3         | 9.26E-10    | 0.2704        | 8     | 2           | AABR07053650.1     |               |
| DMR3:122627301 | 3   | 122627301 | 300    | 1         | 1.97E-07    | 2.1536        | 1     | 0.3333      |                    |               |
| DMR3:124509901 | 3   | 124509901 | 100    | 1         | 1.83E-07    | 0.1379        | 1     | 1           | Prnp               | Development   |
| DMR3:125342701 | 3   | 125342701 | 3200   | 2         | 8.73E-09    | 1.8062        | 63    | 1.9688      | LOC681292          |               |
| DMR3:134020101 | 3   | 134020101 | 1500   | 1         | 5.07E-07    | 0.5643        | 36    | 2.4         |                    |               |
| DMR3:162107601 | 3   | 162107601 | 200    | 2         | 1.01E-07    | 0.2265        | 1     | 0.5         | Slc13a3;RF00001    | Transport     |
| DMR4:7168501   | 4   | 7168501   | 500    | 1         | 5.61E-07    | 2.7004        | 6     | 1.2         | Asb10;Gbx1         |               |
| DMR4:32150901  | 4   | 32150901  | 100    | 1         | 8.30E-07    | 3.3567        | 0     | 0           |                    |               |
| DMR4:39263801  | 4   | 39263801  | 1300   | 1         | 5.27E-07    | 0.53          | 11    | 0.8462      |                    |               |
| DMR4:87754001  | 4   | 87754001  | 100    | 1         | 3.66E-08    | 0             | 0     | 0           | Vom1r73            | Receptor      |
| DMR4:87756101  | 4   | 87756101  | 200    | 2         | 3.21E-08    | 0             | 0     | 0           | Vom1r73            | Receptor      |
| DMR4:115939201 | 4   | 115939201 | 500    | 1         | 3.11E-07    | 1.9501        | 9     | 1.8         |                    |               |
| DMR4:116043001 | 4   | 116043001 | 600    | 1         | 1.12E-08    | 2.0639        | 7     | 1.1667      |                    |               |
| DMR4:121003701 | 4   | 121003701 | 300    | 1         | 4.50E-07    | 2.6942        | 12    | 4           | LOC102555094       |               |
| DMR4:122483501 | 4   | 122483501 | 300    | 1         | 5.84E-07    | 0.0745        | 5     | 1.6667      |                    |               |
| DMR4:123570001 | 4   | 123570001 | 1300   | 3         | 1.23E-08    | 1.861         | 7     | 0.5385      |                    |               |

|                |   |           |      |   |          |        |     |        |                   |                            |
|----------------|---|-----------|------|---|----------|--------|-----|--------|-------------------|----------------------------|
| DMR4:127463301 | 4 | 127463301 | 1300 | 2 | 5.08E-07 | 0      | 11  | 0.8462 |                   |                            |
| DMR4:129949701 | 4 | 129949701 | 400  | 2 | 2.58E-07 | 2.8767 | 5   | 1.25   |                   |                            |
| DMR4:160837001 | 4 | 160837001 | 600  | 1 | 2.32E-07 | 1.9503 | 3   | 0.5    |                   |                            |
| DMR4:162294301 | 4 | 162294301 | 100  | 1 | 1.01E-07 | 0.0106 | 0   | 0      | Clec2dl1;Clec2d   | Development                |
| DMR4:174460801 | 4 | 174460801 | 500  | 1 | 6.60E-09 | 3.0218 | 8   | 1.6    |                   |                            |
| DMR4:176247901 | 4 | 176247901 | 1000 | 1 | 5.51E-07 | 1.7922 | 33  | 3.3    | RF00560;Slc21a4   |                            |
| DMR4:176457201 | 4 | 176457201 | 200  | 1 | 4.41E-07 | 0.4307 | 3   | 1.5    | Slco1a2;RF00100   | Transport                  |
| DMR4:179061001 | 4 | 179061001 | 1700 | 1 | 2.53E-07 | 6.2475 | 18  | 1.0588 | RF00560           |                            |
| DMR4:179528801 | 4 | 179528801 | 500  | 1 | 9.14E-08 | 2.7736 | 10  | 2      |                   |                            |
| DMR4:182543701 | 4 | 182543701 | 900  | 2 | 1.99E-08 | 1.5623 | 28  | 3.1111 | Far2              | Metabolism                 |
| DMR5:6373001   | 5 | 6373001   | 1600 | 2 | 1.80E-07 | 0.3459 | 24  | 1.5    | AABR07046778.1    |                            |
| DMR5:24526601  | 5 | 24526601  | 1100 | 1 | 2.79E-07 | 0.0587 | 18  | 1.6364 | Dpy19L4           | Development                |
| DMR5:36441901  | 5 | 36441901  | 200  | 2 | 3.05E-08 | 0      | 1   | 0.5    | AABR07047528.1    |                            |
| DMR5:42115501  | 5 | 42115501  | 200  | 1 | 7.25E-07 | 0.1831 | 0   | 0      |                   |                            |
| DMR5:57307101  | 5 | 57307101  | 200  | 2 | 8.58E-08 | 0.3089 | 2   | 1      | Nfx1              | Transcription              |
| DMR5:59996501  | 5 | 59996501  | 2000 | 1 | 5.38E-07 | 1.7436 | 27  | 1.35   | Pax5              | Transcription              |
| DMR5:60795901  | 5 | 60795901  | 800  | 1 | 4.12E-08 | 1.6935 | 11  | 1.375  |                   |                            |
| DMR5:71940901  | 5 | 71940901  | 200  | 1 | 1.74E-09 | 0.3016 | 3   | 1.5    |                   |                            |
| DMR5:79611401  | 5 | 79611401  | 200  | 1 | 3.39E-07 | 0.0207 | 1   | 0.5    |                   |                            |
| DMR5:106888401 | 5 | 106888401 | 400  | 1 | 9.04E-07 | 3.3352 | 9   | 2.25   |                   |                            |
| DMR5:119428601 | 5 | 119428601 | 400  | 1 | 2.76E-08 | 5.1054 | 4   | 1      |                   |                            |
| DMR5:120203401 | 5 | 120203401 | 400  | 1 | 4.44E-08 | 1.9929 | 4   | 1      |                   |                            |
| DMR5:127575801 | 5 | 127575801 | 700  | 1 | 8.49E-07 | 1.4261 | 1   | 0.1429 | RF00410;Slc1a7    | Transport                  |
| DMR5:136103301 | 5 | 136103301 | 100  | 1 | 2.33E-08 | 0.1208 | 2   | 2      | RGD1563714;Tmem53 |                            |
| DMR5:143484101 | 5 | 143484101 | 100  | 1 | 5.12E-08 | 0.0389 | 1   | 1      |                   |                            |
| DMR5:147652701 | 5 | 147652701 | 600  | 2 | 4.55E-09 | 1.8863 | 0   | 0      | Bsdc1             |                            |
| DMR5:151994801 | 5 | 151994801 | 200  | 2 | 2.30E-10 | 0.1689 | 1   | 0.5    |                   |                            |
| DMR5:152423401 | 5 | 152423401 | 600  | 2 | 4.79E-07 | 2.0666 | 19  | 3.1667 | Umodl;Catsper4    | Transport                  |
| DMR5:159480301 | 5 | 159480301 | 1300 | 1 | 2.53E-07 | 1.9645 | 13  | 1      | Padi2;Sdhh        | Translation;Metabolism     |
| DMR5:161798601 | 5 | 161798601 | 500  | 1 | 4.80E-09 | 2.2333 | 17  | 3.4    | Prdm2             | Transcription              |
| DMR6:2168101   | 6 | 2168101   | 500  | 1 | 3.43E-07 | 1.6158 | 4   | 0.8    |                   |                            |
| DMR6:2199401   | 6 | 2199401   | 600  | 2 | 3.35E-07 | 2.2352 | 18  | 3      |                   |                            |
| DMR6:6054401   | 6 | 6054401   | 400  | 1 | 4.37E-08 | 0.2754 | 4   | 1      |                   |                            |
| DMR6:6358601   | 6 | 6358601   | 400  | 1 | 5.70E-09 | 1.601  | 1   | 0.25   |                   |                            |
| DMR6:22305001  | 6 | 22305001  | 1600 | 1 | 9.52E-07 | 2.6651 | 27  | 1.6875 | Dpy30             |                            |
| DMR6:29175001  | 6 | 29175001  | 800  | 1 | 6.91E-07 | 1.8693 | 20  | 2.5    | Klhl29            | Transcription              |
| DMR6:60378601  | 6 | 60378601  | 2100 | 1 | 9.28E-09 | 5.3489 | 22  | 1.0476 | Zfp277            | Transcription              |
| DMR6:73155401  | 6 | 73155401  | 500  | 1 | 4.17E-08 | 1.5368 | 2   | 0.4    | Nubpl             | Metabolism                 |
| DMR6:76342801  | 6 | 76342801  | 800  | 1 | 2.44E-07 | 1.7608 | 4   | 0.5    | Aldoat2           |                            |
| DMR6:90935301  | 6 | 90935301  | 600  | 2 | 3.37E-08 | 2.503  | 3   | 0.5    |                   |                            |
| DMR6:108383501 | 6 | 108383501 | 200  | 1 | 5.80E-08 | 0.1135 | 6   | 3      | RF00026;Syndig1l  |                            |
| DMR6:128764501 | 6 | 128764501 | 400  | 1 | 1.17E-07 | 2.9654 | 7   | 1.75   | Glx5              | Metabolism                 |
| DMR6:131161301 | 6 | 131161301 | 800  | 2 | 1.05E-07 | 0.0277 | 12  | 1.5    |                   |                            |
| DMR6:137697201 | 6 | 137697201 | 1800 | 1 | 4.89E-07 | 2.1413 | 30  | 1.6667 |                   |                            |
| DMR6:145202701 | 6 | 145202701 | 500  | 1 | 9.79E-09 | 1.6604 | 1   | 0.2    |                   |                            |
| DMR7:1622601   | 7 | 1622601   | 4200 | 1 | 6.56E-07 | 1.6043 | 223 | 5.3095 | RF00002           |                            |
| DMR7:11762901  | 7 | 11762901  | 100  | 1 | 3.96E-08 | 0      | 1   | 1      | Oaz1;Jsrp1        | Signaling                  |
| DMR7:27290301  | 7 | 27290301  | 1300 | 1 | 3.58E-07 | 1.6289 | 12  | 0.9231 | LOC362863         | Unknown                    |
| DMR7:30458601  | 7 | 30458601  | 700  | 1 | 8.05E-08 | 2.8644 | 18  | 2.5714 | Uhrf1bp1l         | Protein Binding            |
| DMR7:51607001  | 7 | 51607001  | 500  | 1 | 1.12E-07 | 1.4268 | 3   | 0.6    |                   |                            |
| DMR7:61301301  | 7 | 61301301  | 200  | 1 | 8.95E-08 | 0.016  | 1   | 0.5    |                   |                            |
| DMR7:64066001  | 7 | 64066001  | 500  | 1 | 5.25E-07 | 2.3123 | 10  | 2      | Srgap1            | Signaling                  |
| DMR7:81441001  | 7 | 81441001  | 500  | 1 | 5.62E-07 | 0.2606 | 1   | 0.2    | Angpt1            | Growth Factors & Cytokines |
| DMR7:108664501 | 7 | 108664501 | 200  | 1 | 3.16E-07 | 0      | 1   | 0.5    | Phf20l1           | Epigenetic                 |
| DMR7:118462901 | 7 | 118462901 | 2400 | 1 | 5.17E-07 | 1.892  | 42  | 1.75   | AABR07058464.1    |                            |
| DMR7:121045001 | 7 | 121045001 | 300  | 1 | 2.59E-07 | 0.3232 | 2   | 0.6667 | Cbx6              | Transcription              |
| DMR7:127102701 | 7 | 127102701 | 500  | 1 | 2.22E-07 | 1.8955 | 6   | 1.2    | Tbc1d22a          | Signaling                  |
| DMR7:130536001 | 7 | 130536001 | 1500 | 1 | 3.52E-07 | 2.1705 | 35  | 2.3333 | Shank3;Acr        | Signaling                  |
| DMR7:142410701 | 7 | 142410701 | 300  | 1 | 5.48E-07 | 6.0842 | 11  | 3.6667 | Slc4a8            | Transport                  |
| DMR8:4984001   | 8 | 4984001   | 200  | 1 | 8.44E-07 | 0      | 1   | 0.5    |                   |                            |
| DMR8:14000501  | 8 | 14000501  | 400  | 1 | 9.15E-07 | 0      | 6   | 1.5    |                   |                            |
| DMR8:64650601  | 8 | 64650601  | 500  | 1 | 4.53E-08 | 0.0865 | 6   | 1.2    | Myo9a             | Cytoskeleton               |
| DMR8:90794301  | 8 | 90794301  | 1000 | 1 | 9.95E-07 | 0      | 12  | 1.2    |                   |                            |
| DMR8:93781301  | 8 | 93781301  | 400  | 1 | 7.87E-07 | 1.9152 | 3   | 0.75   |                   |                            |
| DMR8:111303401 | 8 | 111303401 | 1700 | 1 | 1.48E-07 | 1.4972 | 26  | 1.5294 |                   |                            |
| DMR8:115004001 | 8 | 115004001 | 800  | 1 | 9.73E-07 | 0.1012 | 10  | 1.25   | Poc1a             | Unknown                    |

|                 |    |           |      |   |          |        |    |        |                      |                        |
|-----------------|----|-----------|------|---|----------|--------|----|--------|----------------------|------------------------|
| DMR8:123942201  | 8  | 123942201 | 1000 | 1 | 2.55E-08 | 1.4919 | 6  | 0.6    |                      |                        |
| DMR8:126642001  | 8  | 126642001 | 1000 | 1 | 8.57E-08 | 0      | 12 | 1.2    | RF00100              |                        |
| DMR8:132335901  | 8  | 132335901 | 800  | 1 | 2.68E-07 | 1.8818 | 3  | 0.375  | Tmem158              | Unknown                |
| DMR9:7465701    | 9  | 7465701   | 1300 | 1 | 9.29E-07 | 1.7085 | 89 | 6.8462 | RF00002              |                        |
| DMR9:17902401   | 9  | 17902401  | 400  | 1 | 7.90E-08 | 2.9024 | 7  | 1.75   | Spats1               |                        |
| DMR9:18166501   | 9  | 18166501  | 500  | 1 | 5.75E-07 | 1.634  | 2  | 0.4    |                      |                        |
| DMR9:21131101   | 9  | 21131101  | 100  | 1 | 6.50E-07 | 0      | 0  | 0      | Ptchd4               | Unknown                |
| DMR9:28290801   | 9  | 28290801  | 200  | 1 | 3.86E-07 | 0      | 0  | 0      |                      |                        |
| DMR9:81253701   | 9  | 81253701  | 100  | 1 | 2.12E-07 | 2.653  | 4  | 4      | Tns1                 | Signaling              |
| DMR9:85930001   | 9  | 85930001  | 1100 | 1 | 4.79E-08 | 0.2544 | 17 | 1.5455 |                      |                        |
| DMR9:91255501   | 9  | 91255501  | 1100 | 1 | 1.70E-07 | 3.6037 | 5  | 0.4545 |                      |                        |
| DMR9:93276601   | 9  | 93276601  | 500  | 2 | 1.24E-08 | 1.7934 | 8  | 1.6    | Armc9                |                        |
| DMR9:96468301   | 9  | 96468301  | 400  | 1 | 5.21E-08 | 2.3879 | 6  | 1.5    |                      |                        |
| DMR9:97721701   | 9  | 97721701  | 1100 | 1 | 4.34E-07 | 1.9342 | 19 | 1.7273 |                      |                        |
| DMR9:112887101  | 9  | 112887101 | 500  | 1 | 1.20E-07 | 4.1349 | 4  | 0.8    |                      |                        |
| DMR9:113005301  | 9  | 113005301 | 400  | 2 | 3.12E-07 | 2.0462 | 6  | 1.5    | Tmem232              |                        |
| DMR10:6418801   | 10 | 6418801   | 200  | 1 | 8.04E-07 | 3.0685 | 3  | 1.5    |                      |                        |
| DMR10:6532701   | 10 | 6532701   | 100  | 1 | 9.53E-07 | 0.1302 | 4  | 4      |                      |                        |
| DMR10:18229701  | 10 | 18229701  | 800  | 2 | 2.12E-09 | 1.7804 | 16 | 2      | Ranbp17              | Binding Protein        |
| DMR10:20357301  | 10 | 20357301  | 1700 | 1 | 3.44E-07 | 2.3119 | 45 | 2.6471 | Slit3                | Development            |
| DMR10:29043201  | 10 | 29043201  | 500  | 1 | 2.17E-07 | 1.8034 | 4  | 0.8    | Slu7                 | Transcription          |
| DMR10:35431301  | 10 | 35431301  | 600  | 1 | 3.85E-07 | 2.1538 | 19 | 3.1667 | Rasgef1c             | Signaling              |
| DMR10:56153801  | 10 | 56153801  | 300  | 1 | 7.38E-07 | 0.1807 | 2  | 0.6667 | Dnah2;Efnb3          | Cytoskeleton;Signaling |
| DMR10:59111001  | 10 | 59111001  | 700  | 4 | 1.16E-08 | 1.8048 | 16 | 2.2857 | Spns3                | Transport              |
| DMR10:71958201  | 10 | 71958201  | 1100 | 1 | 2.11E-07 | 1.9581 | 17 | 1.5455 |                      |                        |
| DMR10:72989801  | 10 | 72989801  | 300  | 1 | 2.61E-08 | 0.3163 | 3  | 1      |                      |                        |
| DMR10:77314701  | 10 | 77314701  | 300  | 1 | 2.12E-07 | 0.3776 | 0  | 0      |                      |                        |
| DMR10:88035401  | 10 | 88035401  | 500  | 1 | 2.03E-07 | 1.8838 | 12 | 2.4    | Krt13                | Cytoskeleton           |
| DMR10:101373901 | 10 | 101373901 | 700  | 1 | 7.87E-08 | 2.0737 | 18 | 2.5714 |                      |                        |
| DMR10:102277001 | 10 | 102277001 | 900  | 1 | 4.01E-07 | 2.331  | 12 | 1.3333 | Cdc42ep4             | Signaling              |
| DMR11:30323201  | 11 | 30323201  | 100  | 1 | 3.10E-09 | 0.0237 | 0  | 0      |                      |                        |
| DMR11:35354101  | 11 | 35354101  | 1000 | 1 | 2.12E-08 | 1.5548 | 3  | 0.3    |                      |                        |
| DMR11:43693201  | 11 | 43693201  | 200  | 1 | 5.43E-08 | 0      | 0  | 0      | Olr1558;Olr1559      | Receptor               |
| DMR11:57349901  | 11 | 57349901  | 900  | 1 | 4.13E-08 | 0      | 5  | 0.5556 | Phldb2               |                        |
| DMR11:61977001  | 11 | 61977001  | 1300 | 1 | 7.59E-07 | 2.4135 | 25 | 1.9231 | Gramd1c;Tigit        | Receptor               |
| DMR11:64662901  | 11 | 64662901  | 500  | 1 | 1.65E-09 | 1.8884 | 10 | 2      | Arhgap31             | Signaling              |
| DMR11:74159601  | 11 | 74159601  | 800  | 1 | 4.84E-07 | 2.929  | 16 | 2      |                      |                        |
| DMR12:441101    | 12 | 441101    | 1400 | 1 | 8.54E-08 | 1.9144 | 56 | 4      |                      |                        |
| DMR12:1995801   | 12 | 1995801   | 900  | 1 | 1.54E-08 | 0      | 22 | 2.4444 | Arhgef18;Pex11g      | Signaling              |
| DMR12:13769001  | 12 | 13769001  | 300  | 1 | 1.08E-07 | 2.8871 | 7  | 2.3333 |                      |                        |
| DMR12:14995101  | 12 | 14995101  | 400  | 1 | 5.05E-07 | 2.1701 | 8  | 2      | AABR07035437.1       |                        |
| DMR12:15478601  | 12 | 15478601  | 200  | 1 | 7.61E-07 | 0.0303 | 0  | 0      |                      |                        |
| DMR12:22811401  | 12 | 22811401  | 3000 | 1 | 7.72E-07 | 0.0814 | 49 | 1.6333 | Ift22                |                        |
| DMR12:24660801  | 12 | 24660801  | 2100 | 1 | 2.42E-07 | 1.4903 | 14 | 0.6667 | Vps37d;Dnajc30;Bud23 | Transcription          |
| DMR12:25707901  | 12 | 25707901  | 1100 | 1 | 5.80E-07 | 2.1235 | 13 | 1.1818 |                      |                        |
| DMR12:29832501  | 12 | 29832501  | 400  | 1 | 4.10E-08 | 3.0752 | 8  | 2      | Tyw1                 | Translation            |
| DMR12:33137101  | 12 | 33137101  | 200  | 2 | 1.88E-07 | 0.0904 | 4  | 2      |                      |                        |
| DMR12:37309401  | 12 | 37309401  | 800  | 1 | 6.19E-07 | 1.471  | 13 | 1.625  |                      |                        |
| DMR12:41929801  | 12 | 41929801  | 700  | 1 | 5.61E-07 | 2.4064 | 8  | 1.1429 | Rbm19                | Transcription          |
| DMR12:42020701  | 12 | 42020701  | 400  | 1 | 2.71E-07 | 3.6837 | 5  | 1.25   | RF00001              |                        |
| DMR12:43468101  | 12 | 43468101  | 800  | 1 | 1.13E-07 | 2.6545 | 25 | 3.125  | Med13l               | Transcription          |
| DMR12:46341301  | 12 | 46341301  | 3800 | 1 | 7.25E-07 | 2.4399 | 72 | 1.8947 | Cit                  | Signaling              |
| DMR12:48316101  | 12 | 48316101  | 1600 | 2 | 3.57E-08 | 1.5281 | 43 | 2.6875 | Usp30;Svop           | Proteolysis;Transport  |
| DMR12:51712601  | 12 | 51712601  | 800  | 1 | 1.61E-09 | 2.8958 | 8  | 1      | Ttc28                | Unknown                |
| DMR13:20086301  | 13 | 20086301  | 100  | 1 | 3.81E-08 | 0      | 0  | 0      |                      |                        |
| DMR13:20177201  | 13 | 20177201  | 300  | 1 | 9.90E-08 | 0.4338 | 3  | 1      |                      |                        |
| DMR13:30815101  | 13 | 30815101  | 200  | 1 | 1.61E-07 | 0.0933 | 0  | 0      |                      |                        |
| DMR13:45327101  | 13 | 45327101  | 400  | 1 | 1.82E-07 | 3.4574 | 8  | 2      | Cxcr4;AABR07020898.1 | Receptor               |
| DMR13:49955001  | 13 | 49955001  | 500  | 1 | 8.43E-08 | 2.7019 | 9  | 1.8    | AABR07020979.1       |                        |
| DMR13:70459301  | 13 | 70459301  | 1400 | 2 | 3.32E-07 | 1.7613 | 16 | 1.1429 | Nmnat2               | Metabolism             |
| DMR13:71376301  | 13 | 71376301  | 200  | 1 | 9.81E-08 | 0.0268 | 2  | 1      |                      |                        |
| DMR13:72040101  | 13 | 72040101  | 200  | 2 | 4.81E-10 | 0.1033 | 2  | 1      | Cacna1e              | Transport              |
| DMR13:79666401  | 13 | 79666401  | 200  | 2 | 4.08E-11 | 0.0472 | 1  | 0.5    | AABR07021589.1       |                        |
| DMR13:83458201  | 13 | 83458201  | 200  | 2 | 3.90E-07 | 0      | 5  | 2.5    | Sft2d2               |                        |
| DMR13:83536701  | 13 | 83536701  | 800  | 1 | 2.25E-08 | 1.7763 | 16 | 2      | Gpr161               | Receptor               |
| DMR13:83566201  | 13 | 83566201  | 1500 | 1 | 5.68E-08 | 1.7145 | 11 | 0.7333 | Gpr161               | Receptor               |
| DMR13:97420801  | 13 | 97420801  | 900  | 1 | 2.11E-07 | 0.0121 | 15 | 1.6667 |                      |                        |

|                 |    |           |      |   |          |        |    |        |                               |                      |
|-----------------|----|-----------|------|---|----------|--------|----|--------|-------------------------------|----------------------|
| DMR13:104633701 | 13 | 104633701 | 400  | 1 | 2.83E-07 | 4.0377 | 11 | 2.75   |                               |                      |
| DMR13:108398801 | 13 | 108398801 | 2900 | 1 | 4.38E-07 | 1.5988 | 50 | 1.7241 | Prox1                         | Transcription        |
| DMR13:111377201 | 13 | 111377201 | 400  | 1 | 1.59E-07 | 2.217  | 2  | 0.5    | Hhat                          | Metabolism           |
| DMR13:112211301 | 13 | 112211301 | 400  | 1 | 6.56E-07 | 2.4723 | 11 | 2.75   |                               |                      |
| DMR14:3304701   | 14 | 3304701   | 1600 | 1 | 6.63E-07 | 1.4687 | 40 | 2.5    | Btbd8;AC106605.1              |                      |
| DMR14:4217901   | 14 | 4217901   | 200  | 1 | 4.87E-08 | 0      | 2  | 1      |                               |                      |
| DMR14:22067301  | 14 | 22067301  | 2900 | 1 | 8.90E-07 | 1.7481 | 83 | 2.8621 | Sult1e1                       | Metabolism           |
| DMR14:26517901  | 14 | 26517901  | 2800 | 1 | 8.16E-07 | 2.223  | 83 | 2.9643 |                               |                      |
| DMR14:36433901  | 14 | 36433901  | 400  | 1 | 2.85E-07 | 1.5776 | 6  | 1.5    | Scfd2                         | Unknown              |
| DMR14:37535001  | 14 | 37535001  | 1800 | 1 | 5.57E-08 | 3.1071 | 36 | 2      |                               |                      |
| DMR14:69971501  | 14 | 69971501  | 200  | 1 | 6.74E-07 | 0.3684 | 2  | 1      |                               |                      |
| DMR14:81384801  | 14 | 81384801  | 400  | 1 | 9.05E-07 | 2.7069 | 15 | 3.75   | Add1                          | Cytoskeleton         |
| DMR14:89167701  | 14 | 89167701  | 500  | 1 | 1.19E-07 | 1.7034 | 5  | 1      | Pkd11                         | Signaling            |
| DMR14:97276601  | 14 | 97276601  | 100  | 1 | 3.28E-08 | 0      | 0  | 0      |                               |                      |
| DMR15:9170601   | 15 | 9170601   | 700  | 1 | 3.63E-07 | 1.4938 | 5  | 0.7143 |                               |                      |
| DMR15:23225401  | 15 | 23225401  | 100  | 1 | 3.76E-08 | 0      | 0  | 0      |                               |                      |
| DMR15:33822601  | 15 | 33822601  | 300  | 1 | 1.64E-07 | 2.7814 | 14 | 4.6667 | RGD1564324                    |                      |
| DMR15:42766801  | 15 | 42766801  | 500  | 2 | 7.99E-08 | 1.664  | 3  | 0.6    | Ephx2                         | Metabolism           |
| DMR15:44340601  | 15 | 44340601  | 1100 | 1 | 1.09E-07 | 0.0201 | 9  | 0.8182 |                               |                      |
| DMR15:47867301  | 15 | 47867301  | 600  | 1 | 9.44E-07 | 1.6895 | 1  | 0.1667 |                               |                      |
| DMR15:55228001  | 15 | 55228001  | 2600 | 1 | 9.23E-07 | 1.5355 | 21 | 0.8077 |                               |                      |
| DMR15:60440301  | 15 | 60440301  | 4200 | 1 | 4.57E-07 | 1.4325 | 45 | 1.0714 |                               |                      |
| DMR15:81511201  | 15 | 81511201  | 400  | 1 | 7.16E-07 | 0.4101 | 2  | 0.5    |                               |                      |
| DMR15:100076301 | 15 | 100076301 | 200  | 2 | 8.98E-09 | 0.0048 | 0  | 0      |                               |                      |
| DMR15:106629601 | 15 | 106629601 | 200  | 1 | 1.81E-07 | 0.3623 | 0  | 0      | Farp1;Stk24                   | Signaling            |
| DMR16:24572901  | 16 | 24572901  | 100  | 1 | 6.07E-08 | 0      | 0  | 0      | Naf1                          |                      |
| DMR16:53012201  | 16 | 53012201  | 300  | 1 | 5.47E-09 | 0.2957 | 2  | 0.6667 |                               |                      |
| DMR16:56833001  | 16 | 56833001  | 200  | 1 | 9.29E-07 | 0      | 1  | 0.5    | Msr1                          | Receptor             |
| DMR16:63051101  | 16 | 63051101  | 400  | 1 | 9.79E-10 | 3.1784 | 5  | 1.25   |                               |                      |
| DMR16:68420201  | 16 | 68420201  | 400  | 1 | 4.81E-07 | 1.9521 | 14 | 3.5    |                               |                      |
| DMR16:73185601  | 16 | 73185601  | 1000 | 1 | 2.01E-07 | 1.4421 | 4  | 0.4    |                               |                      |
| DMR16:77234001  | 16 | 77234001  | 500  | 1 | 9.53E-07 | 0.1388 | 6  | 1.2    |                               |                      |
| DMR16:82573001  | 16 | 82573001  | 100  | 1 | 5.35E-08 | 5.2933 | 4  | 4      | AABR07026544.1                |                      |
| DMR17:687201    | 17 | 687201    | 100  | 1 | 2.50E-07 | 0.1431 | 1  | 1      | Npepo                         | Proteolysis          |
| DMR17:6998501   | 17 | 6998501   | 1100 | 1 | 8.19E-08 | 0.1375 | 16 | 1.4545 | AABR07026957.1                |                      |
| DMR17:9711201   | 17 | 9711201   | 1200 | 1 | 1.27E-07 | 0.304  | 27 | 2.25   | Grk6                          | Signaling            |
| DMR17:24592201  | 17 | 24592201  | 1400 | 2 | 3.69E-07 | 1.908  | 20 | 1.4286 |                               |                      |
| DMR17:62774301  | 17 | 62774301  | 300  | 1 | 1.02E-07 | 6.3048 | 4  | 1.3333 | AABR07028262.1;AABR07028266.1 |                      |
| DMR17:83143701  | 17 | 83143701  | 200  | 1 | 1.21E-07 | 0      | 0  | 0      |                               |                      |
| DMR18:6900801   | 18 | 6900801   | 300  | 1 | 4.58E-07 | 4.6657 | 5  | 1.6667 | Chst9                         | Metabolism           |
| DMR18:51927301  | 18 | 51927301  | 300  | 1 | 8.60E-09 | 4.2796 | 4  | 1.3333 |                               | 3-Mar Metabolism     |
| DMR18:52372001  | 18 | 52372001  | 1800 | 1 | 6.23E-07 | 0.2494 | 27 | 1.5    | Megf10                        | Extracellular Matrix |
| DMR18:67838001  | 18 | 67838001  | 200  | 1 | 1.18E-07 | 0      | 0  | 0      |                               |                      |
| DMR18:71246301  | 18 | 71246301  | 200  | 1 | 4.66E-07 | 0.3448 | 0  | 0      | Dym                           |                      |
| DMR19:8630701   | 19 | 8630701   | 300  | 1 | 1.11E-07 | 0      | 0  | 0      |                               |                      |
| DMR19:31459101  | 19 | 31459101  | 600  | 1 | 2.57E-07 | 3.2288 | 6  | 1      |                               |                      |
| DMR19:33869401  | 19 | 33869401  | 100  | 1 | 4.09E-07 | 0.1398 | 0  | 0      | RF00560                       |                      |
| DMR19:49571501  | 19 | 49571501  | 500  | 1 | 4.63E-09 | 2.9105 | 10 | 2      | Pkd12                         | Signaling            |
| DMR19:53384801  | 19 | 53384801  | 200  | 1 | 5.84E-07 | 2.1261 | 3  | 1.5    |                               |                      |
| DMR19:60219101  | 19 | 60219101  | 1100 | 2 | 5.26E-08 | 1.5885 | 8  | 0.7273 | Pard3                         | Cell Junction        |
| DMR20:3632101   | 20 | 3632101   | 2900 | 2 | 1.52E-09 | 1.5018 | 35 | 1.2069 | AABR07044370.1                |                      |
| DMR20:4334301   | 20 | 4334301   | 1400 | 1 | 1.36E-07 | 3.3785 | 33 | 2.3571 | LOC103689965;Notch4           |                      |
| DMR20:15104701  | 20 | 15104701  | 300  | 1 | 2.10E-08 | 0.0072 | 0  | 0      | Pcdh15                        | Extracellular Matrix |
| DMR20:22953701  | 20 | 22953701  | 1400 | 1 | 1.96E-07 | 1.7938 | 16 | 1.1429 | Reep3                         | Receptor             |
| DMR20:30499801  | 20 | 30499801  | 600  | 1 | 5.10E-09 | 0.4312 | 0  | 0      |                               |                      |
| DMR20:34872701  | 20 | 34872701  | 1700 | 1 | 4.58E-07 | 1.7986 | 33 | 1.9412 | Mcm9                          | Transcription        |
| DMR20:47411701  | 20 | 47411701  | 400  | 1 | 3.38E-07 | 1.961  | 12 | 3      | Ostm1                         |                      |

|                |    |           |       |   |          |        |     |        |                                                                                                                                                                                                                                                                                                                                                                              |             |
|----------------|----|-----------|-------|---|----------|--------|-----|--------|------------------------------------------------------------------------------------------------------------------------------------------------------------------------------------------------------------------------------------------------------------------------------------------------------------------------------------------------------------------------------|-------------|
|                |    |           |       |   |          |        |     |        | AY172581.13;AY172581.9;AY172581.3;AY172581.24;AY172581.14;Mt-nd1;AY172581.4;AY172581.21;AY172581.15;Mt-nd2;AY172581.6;AY172581.22;AY172581.18;AY172581.10;AY172581.7;Mt-co1;AY172581.19;AY172581.12;Mt-co2;AY172581.1;Mt-atp8;Mt-atp6;Mt-co3;AY172581.5;Mt-nd3;AY172581.16;Mt-nd4;AY172581.23;AY172581.17;AY172581.11;Mt-nd5;Mt-nd6;AY172581.20;Mt-cyb;AY172581.8;AY172581.2 |             |
| DMRMT:1        | MT | 1         | 16300 | 4 | 2.48E-07 | 0.254  | 303 | 1.8589 |                                                                                                                                                                                                                                                                                                                                                                              |             |
| DMRX:31179701  | X  | 31179701  | 300   | 1 | 7.54E-07 | 2.3168 | 4   | 1.3333 | Mospd2                                                                                                                                                                                                                                                                                                                                                                       | Development |
| DMRX:31504101  | X  | 31504101  | 1400  | 1 | 7.24E-07 | 0      | 10  | 0.7143 |                                                                                                                                                                                                                                                                                                                                                                              |             |
| DMRX:36223301  | X  | 36223301  | 200   | 1 | 3.38E-07 | 0.0154 | 1   | 0.5    |                                                                                                                                                                                                                                                                                                                                                                              |             |
| DMRX:66605001  | X  | 66605001  | 200   | 1 | 1.24E-07 | 0.0164 | 0   | 0      | Eda2r                                                                                                                                                                                                                                                                                                                                                                        |             |
| DMRX:81167501  | X  | 81167501  | 100   | 1 | 5.92E-07 | 0      | 0   | 0      |                                                                                                                                                                                                                                                                                                                                                                              |             |
| DMRX:81181401  | X  | 81181401  | 200   | 1 | 2.46E-07 | 0      | 0   | 0      |                                                                                                                                                                                                                                                                                                                                                                              |             |
| DMRX:104557901 | X  | 104557901 | 300   | 1 | 1.56E-07 | 0.1161 | 2   | 0.6667 |                                                                                                                                                                                                                                                                                                                                                                              |             |
| DMRX:117368601 | X  | 117368601 | 800   | 1 | 6.23E-08 | 1.5645 | 7   | 0.875  |                                                                                                                                                                                                                                                                                                                                                                              |             |
| DMRX:120821201 | X  | 120821201 | 300   | 2 | 4.45E-08 | 0.3703 | 8   | 2.6667 |                                                                                                                                                                                                                                                                                                                                                                              |             |
| DMRX:133727801 | X  | 133727801 | 600   | 1 | 9.03E-09 | 0      | 7   | 1.1667 |                                                                                                                                                                                                                                                                                                                                                                              |             |
| DMRX:151484401 | X  | 151484401 | 200   | 2 | 1.13E-07 | 0      | 1   | 0.5    |                                                                                                                                                                                                                                                                                                                                                                              |             |
| DMRY:1527401   | Y  | 1527401   | 400   | 1 | 5.00E-08 | 2.2259 | 16  | 4      |                                                                                                                                                                                                                                                                                                                                                                              |             |



**Supplemental Table S5**  
**Site Table F2 Generation DMRs p<1e-06**

| DMR Name       | Chr | Start     | Length | # Sig Win | min P-value | Exp/Con Ratio | CpG # | CpG Density | Annotation            | Category                           |
|----------------|-----|-----------|--------|-----------|-------------|---------------|-------|-------------|-----------------------|------------------------------------|
| DMR1:72322801  | 1   | 72322801  | 1900   | 1         | 2.63E-07    | 1.791         | 39    | 2.0526      | U2af2;Ccdc106         | Transcription                      |
| DMR1:77280801  | 1   | 77280801  | 600    | 1         | 8.55E-07    | 2.082         | 8     | 1.3333      |                       |                                    |
| DMR1:78806701  | 1   | 78806701  | 200    | 1         | 6.35E-08    | 0.222         | 3     | 1.5         | Dact3                 |                                    |
| DMR1:100431201 | 1   | 100431201 | 600    | 1         | 5.19E-07    | 2.895         | 7     | 1.1667      |                       |                                    |
| DMR1:101416601 | 1   | 101416601 | 1400   | 1         | 3.00E-07    | 2.096         | 24    | 1.7143      | Ntf4;Lhb;Ruvbl2;Gys1  | Signaling;Transcription;Metabolism |
| DMR1:113770201 | 1   | 113770201 | 200    | 1         | 7.89E-07    | 0.14          | 0     | 0           |                       |                                    |
| DMR1:140325401 | 1   | 140325401 | 1000   | 1         | 4.31E-07    | 1.627         | 21    | 2.1         |                       |                                    |
| DMR1:184455501 | 1   | 184455501 | 200    | 1         | 9.33E-07    | 3.12          | 1     | 0.5         |                       |                                    |
| DMR1:199708301 | 1   | 199708301 | 1600   | 1         | 3.30E-08    | 1.891         | 12    | 0.75        | RGD1310127            | Unknown                            |
| DMR1:211959401 | 1   | 211959401 | 300    | 1         | 3.86E-08    | 4.078         | 2     | 0.6667      | AABR07005983.1        |                                    |
| DMR1:246382201 | 1   | 246382201 | 400    | 1         | 5.92E-07    | 2.195         | 8     | 2           | Glis3                 | Transcription                      |
| DMR2:120201    | 2   | 120201    | 4600   | 1         | 2.76E-07    | 2.291         | 183   | 3.9783      |                       |                                    |
| DMR2:9029101   | 2   | 9029101   | 4100   | 1         | 3.47E-07    | 0.321         | 34    | 0.8293      | Adgrv1                |                                    |
| DMR2:10801801  | 2   | 10801801  | 400    | 1         | 2.69E-08    | 2.537         | 3     | 0.75        |                       |                                    |
| DMR2:15654401  | 2   | 15654401  | 100    | 1         | 7.32E-08    | 5.962         | 0     | 0           |                       |                                    |
| DMR2:22052301  | 2   | 22052301  | 800    | 1         | 1.90E-07    | 2.578         | 27    | 3.375       | Fam151b;Zfyve16       | Transport                          |
| DMR2:38539701  | 2   | 38539701  | 500    | 1         | 1.02E-07    | 2.367         | 6     | 1.2         |                       |                                    |
| DMR2:49657501  | 2   | 49657501  | 1000   | 1         | 4.86E-07    | 2.071         | 45    | 4.5         |                       |                                    |
| DMR2:78027401  | 2   | 78027401  | 800    | 1         | 2.50E-07    | 3.029         | 19    | 2.375       | Myo10                 | Cytoskeleton                       |
| DMR2:118493101 | 2   | 118493101 | 1000   | 1         | 8.91E-07    | 1.806         | 29    | 2.9         |                       |                                    |
| DMR2:124002501 | 2   | 124002501 | 1300   | 1         | 6.50E-07    | 0.218         | 14    | 1.0769      |                       |                                    |
| DMR2:148944901 | 2   | 148944901 | 900    | 1         | 3.71E-07    | 1.794         | 27    | 3           |                       |                                    |
| DMR2:152717301 | 2   | 152717301 | 100    | 1         | 9.49E-07    | 5.455         | 0     | 0           |                       |                                    |
| DMR2:225911401 | 2   | 225911401 | 1800   | 1         | 2.28E-07    | 1.457         | 40    | 2.2222      |                       |                                    |
| DMR2:238145001 | 2   | 238145001 | 900    | 1         | 8.85E-07    | 2.457         | 18    | 2           | Gstcd                 |                                    |
| DMR2:240758301 | 2   | 240758301 | 300    | 1         | 6.60E-07    | 2.686         | 6     | 2           | Manba                 | Golgi                              |
| DMR2:252154401 | 2   | 252154401 | 500    | 1         | 3.26E-08    | 1.653         | 12    | 2.4         | Lpar3                 | Receptor                           |
| DMR2:260875901 | 2   | 260875901 | 600    | 1         | 8.31E-07    | 3.12          | 12    | 2           | Tyw3;Cryz             | Metabolism                         |
| DMR3:3912901   | 3   | 3912901   | 2600   | 1         | 4.50E-07    | 2.269         | 84    | 3.2308      | Notch1                | Signaling                          |
| DMR3:9610701   | 3   | 9610701   | 500    | 1         | 2.31E-07    | 0.424         | 0     | 0           |                       |                                    |
| DMR3:13851801  | 3   | 13851801  | 500    | 1         | 4.98E-07    | 2.35          | 9     | 1.8         | Hspa5;Rabepk          | Signaling                          |
| DMR3:20057401  | 3   | 20057401  | 2700   | 1         | 8.56E-07    | 0.309         | 22    | 0.8148      | AABR07051718.1        |                                    |
| DMR3:27129301  | 3   | 27129301  | 400    | 1         | 3.27E-08    | 0.136         | 3     | 0.75        | AABR07051908.1        |                                    |
| DMR3:27256401  | 3   | 27256401  | 500    | 1         | 9.02E-07    | 3.114         | 7     | 1.4         |                       |                                    |
| DMR3:118675601 | 3   | 118675601 | 400    | 2         | 6.98E-09    | 0.29          | 8     | 2           | AABR07053650.1        |                                    |
| DMR3:119480301 | 3   | 119480301 | 400    | 1         | 2.32E-08    | 6.213         | 5     | 1.25        | Ap4e1                 | Golgi                              |
| DMR3:137085101 | 3   | 137085101 | 700    | 1         | 3.17E-07    | 2.377         | 12    | 1.7143      |                       |                                    |
| DMR3:153062201 | 3   | 153062201 | 2400   | 1         | 6.86E-07    | 2.284         | 38    | 1.5833      | RF00283               |                                    |
| DMR3:154266901 | 3   | 154266901 | 400    | 1         | 1.44E-07    | 3.682         | 9     | 2.25        | Ctnnb1                |                                    |
| DMR3:162869201 | 3   | 162869201 | 800    | 1         | 4.14E-07    | 3.702         | 19    | 2.375       | Sulf2                 | Metabolism                         |
| DMR3:168276701 | 3   | 168276701 | 2800   | 1         | 1.74E-07    | 1.494         | 47    | 1.6786      |                       |                                    |
| DMR3:173798401 | 3   | 173798401 | 200    | 1         | 2.73E-07    | 4.839         | 4     | 2           | Phactr3               | Signaling                          |
| DMR3:175859901 | 3   | 175859901 | 300    | 1         | 4.10E-07    | 5.535         | 8     | 2.6667      | Slco4a1               | Transport                          |
| DMR4:76973601  | 4   | 76973601  | 900    | 1         | 5.85E-08    | 0.073         | 9     | 1           | AABR07060487.1        |                                    |
| DMR4:84640301  | 4   | 84640301  | 1500   | 1         | 4.81E-07    | 3.432         | 24    | 1.6         | Wipf3                 | Receptor                           |
| DMR4:91736601  | 4   | 91736601  | 600    | 1         | 1.71E-07    | 0.224         | 2     | 0.3333      | Ccser1                |                                    |
| DMR4:119698401 | 4   | 119698401 | 500    | 1         | 9.63E-07    | 1.807         | 4     | 0.8         | Rab43                 | Signaling                          |
| DMR4:120648401 | 4   | 120648401 | 700    | 1         | 3.59E-07    | 1.95          | 13    | 1.8571      |                       |                                    |
| DMR4:157971601 | 4   | 157971601 | 500    | 1         | 7.77E-08    | 1.91          | 11    | 2.2         | Cd9                   | Extracellular Matrix               |
| DMR5:7201      | 5   | 7201      | 600    | 1         | 5.22E-07    | 2.266         | 21    | 3.5         |                       |                                    |
| DMR5:22118601  | 5   | 22118601  | 1900   | 1         | 9.88E-07    | 1.889         | 34    | 1.7895      |                       |                                    |
| DMR5:61148601  | 5   | 61148601  | 600    | 1         | 1.69E-07    | 4.349         | 9     | 1.5         |                       |                                    |
| DMR5:94943201  | 5   | 94943201  | 400    | 1         | 7.81E-07    | 0.299         | 8     | 2           |                       |                                    |
| DMR5:136698601 | 5   | 136698601 | 400    | 1         | 3.79E-08    | 4.587         | 13    | 3.25        | Slc6a9;Ccdc24;B4galt2 | Metabolism                         |
| DMR5:138450001 | 5   | 138450001 | 1500   | 1         | 6.22E-07    | 3.269         | 21    | 1.4         | AABR07049790.1        |                                    |
| DMR5:143171501 | 5   | 143171501 | 1200   | 1         | 9.43E-07    | 2.66          | 18    | 1.5         |                       |                                    |
| DMR5:163160601 | 5   | 163160601 | 400    | 1         | 8.15E-08    | 5.18          | 6     | 1.5         | Tnfrsf1b              | Apoptosis                          |
| DMR5:168777901 | 5   | 168777901 | 2200   | 1         | 6.68E-08    | 2.779         | 30    | 1.3636      | Camta1                | Transcription                      |
| DMR6:12326001  | 6   | 12326001  | 300    | 1         | 1.22E-07    | 6.1           | 5     | 1.6667      | Ppp1r21               |                                    |
| DMR6:28223001  | 6   | 28223001  | 2800   | 1         | 3.24E-07    | 2.398         | 40    | 1.4286      | Dnmt3a                | Transcription                      |
| DMR6:42815701  | 6   | 42815701  | 500    | 1         | 1.01E-07    | 2.207         | 8     | 1.6         |                       |                                    |
| DMR6:46911001  | 6   | 46911001  | 300    | 2         | 2.97E-08    | 3.226         | 8     | 2.6667      | RF00560               |                                    |
| DMR6:51067001  | 6   | 51067001  | 400    | 1         | 4.83E-07    | 2.825         | 4     | 1           | Cog5                  | Golgi                              |
| DMR6:78526101  | 6   | 78526101  | 500    | 1         | 5.65E-07    | 1.776         | 12    | 2.4         |                       |                                    |

|                 |    |           |      |   |          |       |     |         |                                                                                                          |                          |
|-----------------|----|-----------|------|---|----------|-------|-----|---------|----------------------------------------------------------------------------------------------------------|--------------------------|
| DMR6:126228401  | 6  | 126228401 | 100  | 1 | 4.61E-07 | 0.238 | 0   | 0       | Rin3                                                                                                     | Signaling                |
| DMR6:126609401  | 6  | 126609401 | 400  | 1 | 9.97E-07 | 1.954 | 8   | 2       |                                                                                                          |                          |
| DMR6:127002201  | 6  | 127002201 | 600  | 1 | 5.99E-07 | 2.065 | 20  | 3.3333  | Unc79;RF02271                                                                                            |                          |
| DMR6:127673301  | 6  | 127673301 | 400  | 1 | 3.40E-07 | 2.513 | 6   | 1.5     | Serpina9                                                                                                 | Proteolysis              |
| DMR6:132656501  | 6  | 132656501 | 1800 | 1 | 5.50E-07 | 0.199 | 12  | 0.6667  |                                                                                                          |                          |
| DMR6:134502501  | 6  | 134502501 | 900  | 1 | 2.78E-07 | 4.24  | 26  | 2.8889  |                                                                                                          |                          |
| DMR7:6471401    | 7  | 6471401   | 400  | 1 | 3.74E-07 | 2.658 | 18  | 4.5     |                                                                                                          |                          |
| DMR7:14224201   | 7  | 14224201  | 2600 | 1 | 4.00E-07 | 2.473 | 73  | 2.8077  | Ephx3;Brd4                                                                                               | Metabolism;Transcription |
| DMR7:21357701   | 7  | 21357701  | 2000 | 1 | 8.34E-07 | 0.243 | 11  | 0.55    |                                                                                                          |                          |
| DMR7:66505701   | 7  | 66505701  | 700  | 1 | 4.55E-07 | 2.119 | 19  | 2.7143  |                                                                                                          |                          |
| DMR7:69618501   | 7  | 69618501  | 100  | 1 | 6.07E-07 | 0.128 | 0   | 0       |                                                                                                          |                          |
| DMR7:73275601   | 7  | 73275601  | 1000 | 1 | 5.04E-07 | 2.351 | 16  | 1.6     | Rida;Pop1                                                                                                | Transcription            |
| DMR7:142252601  | 7  | 142252601 | 1100 | 1 | 5.73E-07 | 2.228 | 23  | 2.0909  | Dazap2;Smagp                                                                                             |                          |
| DMR8:6181801    | 8  | 6181801   | 200  | 1 | 1.03E-07 | 7.794 | 1   | 0.5     | Yap1                                                                                                     | Transcription            |
| DMR8:7978401    | 8  | 7978401   | 400  | 1 | 3.43E-07 | 2.993 | 7   | 1.75    | Cntn5                                                                                                    | Extracellular Matrix     |
| DMR8:13067101   | 8  | 13067101  | 3700 | 1 | 4.55E-07 | 2.834 | 62  | 1.6757  | Amotl1                                                                                                   | Unknown                  |
| DMR8:72419601   | 8  | 72419601  | 700  | 1 | 8.25E-07 | 3.136 | 28  | 4       | Car12                                                                                                    | Metabolism               |
| DMR8:82177201   | 8  | 82177201  | 800  | 1 | 5.09E-08 | 2.149 | 9   | 1.125   | Myo5c                                                                                                    | Cytoskeleton             |
| DMR8:111392201  | 8  | 111392201 | 300  | 1 | 2.05E-08 | 0.41  | 2   | 0.6667  | Ryk                                                                                                      | Receptor                 |
| DMR8:115073801  | 8  | 115073801 | 500  | 1 | 1.49E-07 | 2.245 | 23  | 4.6     | Dusp7                                                                                                    | Signaling                |
| DMR8:116339001  | 8  | 116339001 | 400  | 1 | 2.12E-09 | 2.268 | 14  | 3.5     | Hyal3;Hyal1;Nat6;Ifrd2;Lsmem2                                                                            | Receptor;Metabolism      |
| DMR8:119126501  | 8  | 119126501 | 500  | 1 | 3.61E-09 | 2.212 | 11  | 2.2     | Prss50;Prss45;Prss46                                                                                     | Protease                 |
| DMR8:126109101  | 8  | 126109101 | 500  | 1 | 5.03E-07 | 2.811 | 14  | 2.8     |                                                                                                          |                          |
| DMR9:15614901   | 9  | 15614901  | 600  | 1 | 1.62E-07 | 1.726 | 10  | 1.6667  | RF00026;Guca1a;Guca1b                                                                                    | Signaling                |
| DMR9:16894501   | 9  | 16894501  | 1400 | 1 | 6.86E-07 | 7.622 | 21  | 1.5     | Ttbk1                                                                                                    | Signaling                |
| DMR9:30030101   | 9  | 30030101  | 800  | 1 | 6.19E-07 | 0.278 | 3   | 0.375   | B3gat2                                                                                                   | Metabolism               |
| DMR9:81405001   | 9  | 81405001  | 400  | 1 | 7.49E-07 | 3.2   | 7   | 1.75    | Tns1;AABR07068074.2;Rufy4                                                                                | Signaling                |
| DMR9:105027101  | 9  | 105027101 | 1000 | 1 | 1.70E-07 | 0.218 | 13  | 1.3     |                                                                                                          |                          |
| DMR10:3022901   | 10 | 3022901   | 700  | 1 | 9.86E-07 | 2.797 | 11  | 1.5714  |                                                                                                          |                          |
| DMR10:37992301  | 10 | 37992301  | 1200 | 1 | 2.63E-07 | 2.001 | 18  | 1.5     |                                                                                                          |                          |
| DMR10:56063301  | 10 | 56063301  | 1600 | 1 | 1.70E-07 | 3.792 | 16  | 1       | Dnah2                                                                                                    | Cytoskeleton             |
| DMR10:72071701  | 10 | 72071701  | 200  | 1 | 1.01E-07 | 2.56  | 2   | 1       |                                                                                                          |                          |
| DMR10:97222801  | 10 | 97222801  | 3100 | 1 | 9.57E-08 | 3.353 | 77  | 2.4839  | Axin2                                                                                                    | Signaling                |
| DMR10:100797901 | 10 | 100797901 | 500  | 1 | 1.19E-08 | 5.054 | 14  | 2.8     |                                                                                                          |                          |
| DMR10:101604301 | 10 | 101604301 | 700  | 1 | 7.89E-07 | 7.05  | 17  | 2.4286  |                                                                                                          |                          |
| DMR10:102533401 | 10 | 102533401 | 300  | 1 | 6.51E-07 | 0.45  | 3   | 1       | Sdk2                                                                                                     | Development              |
| DMR10:106332401 | 10 | 106332401 | 500  | 1 | 9.90E-07 | 2.583 | 7   | 1.4     |                                                                                                          | 9-Sep<br>Cytoskeleton    |
| DMR11:13977501  | 11 | 13977501  | 300  | 1 | 8.18E-07 | 0.355 | 3   | 1       | Lipi                                                                                                     |                          |
| DMR11:35566201  | 11 | 35566201  | 500  | 1 | 2.80E-07 | 2.509 | 5   | 1       | Kcnj15                                                                                                   | Transport                |
| DMR11:44538201  | 11 | 44538201  | 600  | 1 | 2.32E-07 | 2.101 | 15  | 2.5     |                                                                                                          |                          |
| DMR11:53610401  | 11 | 53610401  | 700  | 1 | 7.08E-08 | 2.127 | 15  | 2.1429  |                                                                                                          |                          |
| DMR11:69451401  | 11 | 69451401  | 1100 | 1 | 3.54E-07 | 3.097 | 24  | 2.1818  |                                                                                                          |                          |
| DMR12:6437601   | 12 | 6437601   | 1400 | 1 | 6.55E-07 | 2.58  | 45  | 3.2143  | B3glct                                                                                                   |                          |
| DMR12:11284101  | 12 | 11284101  | 500  | 1 | 9.06E-09 | 2.643 | 13  | 2.6     | Arpc1a                                                                                                   | Cytoskeleton             |
| DMR12:11907801  | 12 | 11907801  | 400  | 1 | 1.96E-07 | 1.977 | 5   | 1.25    |                                                                                                          |                          |
| DMR12:25733001  | 12 | 25733001  | 400  | 1 | 7.37E-07 | 2.386 | 8   | 2       |                                                                                                          |                          |
| DMR12:30385601  | 12 | 30385601  | 4200 | 1 | 1.13E-07 | 2.568 | 2   | 0.0476  |                                                                                                          |                          |
| DMR12:31081601  | 12 | 31081601  | 5500 | 2 | 1.30E-08 | 1.961 | 3   | 0.0545  |                                                                                                          |                          |
| DMR12:38163501  | 12 | 38163501  | 3400 | 1 | 2.06E-07 | 1.876 | 67  | 1.9706  | Hcar2                                                                                                    |                          |
| DMR12:43150801  | 12 | 43150801  | 1200 | 1 | 5.70E-08 | 2.162 | 18  | 1.5     |                                                                                                          |                          |
| DMR12:44665701  | 12 | 44665701  | 1000 | 1 | 3.55E-07 | 2.54  | 20  | 2       | Ksr2                                                                                                     | Signaling                |
| DMR12:47571901  | 12 | 47571901  | 800  | 1 | 2.64E-07 | 2.051 | 29  | 3.625   | Ankrd13a                                                                                                 |                          |
| DMR12:51312901  | 12 | 51312901  | 400  | 1 | 6.93E-07 | 1.75  | 5   | 1.25    | Pitpnb                                                                                                   |                          |
| DMR13:19630001  | 13 | 19630001  | 1100 | 1 | 5.38E-08 | 0.259 | 23  | 2.0909  |                                                                                                          |                          |
| DMR13:68428501  | 13 | 68428501  | 400  | 1 | 6.82E-07 | 2.149 | 8   | 2       |                                                                                                          |                          |
| DMR13:69458701  | 13 | 69458701  | 700  | 1 | 5.48E-07 | 2.352 | 13  | 1.8571  |                                                                                                          |                          |
| DMR13:77807101  | 13 | 77807101  | 1100 | 1 | 2.00E-07 | 1.818 | 17  | 1.5455  | AABR07021544.1                                                                                           |                          |
| DMR13:82580001  | 13 | 82580001  | 2900 | 1 | 3.03E-08 | 2.15  | 31  | 1.069   | Ccdc181;Blzf1                                                                                            | Transcription            |
| DMR13:83536701  | 13 | 83536701  | 900  | 1 | 7.62E-07 | 1.652 | 17  | 1.8889  | Gpr161                                                                                                   | Receptor                 |
| DMR13:97421001  | 13 | 97421001  | 600  | 1 | 2.08E-07 | 0.029 | 10  | 1.6667  |                                                                                                          |                          |
| DMR13:98257201  | 13 | 98257201  | 1100 | 1 | 2.45E-07 | 3.525 | 20  | 1.8182  | Cdc42bpa                                                                                                 | Signaling                |
| DMR13:105548801 | 13 | 105548801 | 500  | 1 | 6.08E-08 | 6.151 | 12  | 2.4     | Spata17                                                                                                  |                          |
| DMR13:109470201 | 13 | 109470201 | 1400 | 1 | 3.82E-08 | 2.82  | 16  | 1.1429  | Rps6kc1                                                                                                  | Signaling                |
| DMR14:11319201  | 14 | 11319201  | 900  | 1 | 6.57E-07 | 1.995 | 19  | 2.1111  | AC131411.1;AC131411.2                                                                                    |                          |
| DMR14:17943701  | 14 | 17943701  | 200  | 1 | 6.98E-08 | 3.577 | 3   | 1.5     |                                                                                                          |                          |
| DMR14:46643401  | 14 | 46643401  | 7500 | 1 | 7.34E-07 | 1.392 | 899 | 11.9867 | RF01518;Rn5-8s;AABR07015078.1;AABR07015079.1;AABR07015080.2;AABR07015081.2;AABR07015080.1;AABR07015081.1 |                          |

|                 |    |           |      |   |          |       |    |        |                       |                          |
|-----------------|----|-----------|------|---|----------|-------|----|--------|-----------------------|--------------------------|
| DMR14:62491301  | 14 | 62491301  | 300  | 2 | 2.35E-08 | 0.213 | 0  | 0      |                       |                          |
| DMR14:85361401  | 14 | 85361401  | 2600 | 1 | 2.59E-08 | 1.895 | 48 | 1.8462 | Rhbdd3;Emid1          | Extracellular Matrix     |
| DMR14:101849601 | 14 | 101849601 | 3000 | 1 | 7.36E-07 | 0.315 | 59 | 1.9667 |                       |                          |
| DMR14:104836101 | 14 | 104836101 | 200  | 1 | 1.84E-07 | 0.301 | 12 | 6      | Sertad2               | Transcription            |
| DMR15:47983001  | 15 | 47983001  | 2700 | 1 | 3.34E-07 | 2.836 | 26 | 0.963  |                       |                          |
| DMR15:104436301 | 15 | 104436301 | 400  | 1 | 8.45E-07 | 3.993 | 7  | 1.75   | AABR07019412.1        |                          |
| DMR15:107955301 | 15 | 107955301 | 700  | 1 | 5.02E-07 | 1.851 | 21 | 3      | Dock9                 | Cell Cycle               |
| DMR16:4204301   | 16 | 4204301   | 500  | 1 | 8.91E-08 | 2.939 | 13 | 2.6    |                       |                          |
| DMR16:13318301  | 16 | 13318301  | 100  | 1 | 1.91E-07 | 0.123 | 0  | 0      |                       |                          |
| DMR16:47188601  | 16 | 47188601  | 800  | 1 | 4.08E-07 | 3.149 | 16 | 2      | Dctd                  |                          |
| DMR16:69361101  | 16 | 69361101  | 700  | 1 | 4.80E-07 | 2.258 | 23 | 3.2857 |                       |                          |
| DMR16:83968401  | 16 | 83968401  | 800  | 1 | 9.42E-08 | 1.649 | 8  | 1      |                       |                          |
| DMR17:14462301  | 17 | 14462301  | 2200 | 1 | 5.58E-08 | 3.013 | 35 | 1.5909 | AABR07027111.1        |                          |
| DMR17:29883601  | 17 | 29883601  | 300  | 1 | 2.82E-07 | 4.318 | 4  | 1.3333 | Cdyl                  | Metabolism               |
| DMR17:34625701  | 17 | 34625701  | 300  | 1 | 5.03E-07 | 2.837 | 5  | 1.6667 |                       |                          |
| DMR17:56409801  | 17 | 56409801  | 200  | 1 | 7.31E-07 | 3.803 | 3  | 1.5    |                       |                          |
| DMR17:78196801  | 17 | 78196801  | 200  | 1 | 2.41E-09 | 2.344 | 4  | 2      |                       |                          |
| DMR17:90064101  | 17 | 90064101  | 500  | 1 | 3.37E-07 | 0.124 | 1  | 0.2    | Pdss1;RF00406         | Metabolism               |
| DMR18:25109101  | 18 | 25109101  | 1400 | 1 | 8.31E-07 | 2.893 | 10 | 0.7143 |                       |                          |
| DMR18:52663101  | 18 | 52663101  | 900  | 1 | 4.07E-07 | 5.004 | 19 | 2.1111 |                       |                          |
| DMR18:60691501  | 18 | 60691501  | 200  | 1 | 1.55E-07 | 1.494 | 1  | 0.5    | Nedd4l                | Protease                 |
| DMR18:65427001  | 18 | 65427001  | 900  | 1 | 2.57E-07 | 2.91  | 18 | 2      | Tcf4                  | Transcription            |
| DMR18:74336101  | 18 | 74336101  | 1400 | 1 | 4.18E-07 | 1.836 | 31 | 2.2143 | Epg5                  |                          |
| DMR18:80092601  | 18 | 80092601  | 1300 | 2 | 2.03E-08 | 1.68  | 4  | 0.3077 |                       |                          |
| DMR19:11578001  | 19 | 11578001  | 2000 | 1 | 8.43E-07 | 2.485 | 32 | 1.6    | Gnao1                 | Signaling                |
| DMR19:25337901  | 19 | 25337901  | 1900 | 1 | 7.40E-07 | 2.398 | 43 | 2.2632 | Zswim4                | Transcription            |
| DMR19:28208801  | 19 | 28208801  | 1100 | 1 | 3.36E-08 | 0.185 | 11 | 1      |                       |                          |
| DMR19:31772401  | 19 | 31772401  | 500  | 1 | 4.14E-07 | 2.94  | 11 | 2.2    |                       |                          |
| DMR19:32755401  | 19 | 32755401  | 400  | 1 | 1.29E-07 | 0.352 | 7  | 1.75   |                       |                          |
| DMR19:49241301  | 19 | 49241301  | 500  | 1 | 7.36E-07 | 2.841 | 4  | 0.8    |                       |                          |
| DMR19:50785401  | 19 | 50785401  | 200  | 1 | 1.16E-07 | 3.196 | 4  | 2      |                       |                          |
| DMR19:51577501  | 19 | 51577501  | 1100 | 1 | 7.90E-07 | 1.963 | 22 | 2      | Cdh13                 | Extracellular Matrix     |
| DMR20:4584001   | 20 | 4584001   | 1200 | 1 | 9.09E-08 | 3.654 | 56 | 4.6667 | Zbtb12;Ehmt2;Slc44a4  | Transcription;Metabolism |
| DMR20:12006501  | 20 | 12006501  | 700  | 1 | 7.49E-07 | 3.314 | 19 | 2.7143 | Adarb1                | Epigenetic               |
| DMR20:14061201  | 20 | 14061201  | 500  | 1 | 9.56E-07 | 2.654 | 13 | 2.6    | Lrrc75b               |                          |
| DMR20:22261501  | 20 | 22261501  | 600  | 2 | 4.55E-07 | 2.247 | 25 | 4.1667 | AABR07044820.1        |                          |
| DMR20:32047801  | 20 | 32047801  | 1500 | 1 | 9.23E-08 | 3.402 | 35 | 2.3333 | AABR07045032.1;Supv31 | Transcription            |
| DMR20:35671301  | 20 | 35671301  | 1100 | 1 | 1.03E-07 | 0.099 | 8  | 0.7273 |                       |                          |
| DMR20:42769101  | 20 | 42769101  | 500  | 1 | 7.31E-07 | 3.983 | 10 | 2      | AABR07045319.1        |                          |
| DMRX:63598001   | X  | 63598001  | 4600 | 1 | 5.85E-07 | 1.841 | 19 | 0.413  | Apoo                  | Extracellular Matrix     |
| DMRX:81181501   | X  | 81181501  | 100  | 1 | 7.10E-07 | 0     | 0  | 0      |                       |                          |
| DMRY:1452901    | Y  | 1452901   | 1300 | 1 | 2.51E-08 | 2.097 | 38 | 2.9231 |                       |                          |

**Supplemental Table S6**  
**Site Table F3 Generation DMRs p<1e-06**

| DMR Name       | Chr | Start     | Length | # Sig Win | min P-value | Exp/Con Ratio | CpG # | CpG Density | Annotation                                                               | Category             |
|----------------|-----|-----------|--------|-----------|-------------|---------------|-------|-------------|--------------------------------------------------------------------------|----------------------|
| DMR1:773701    | 1   | 773701    | 500    | 1         | 3.24E-07    | 0.48          | 10    | 2           |                                                                          |                      |
| DMR1:6685501   | 1   | 6685501   | 500    | 2         | 2.32E-08    | 1.529         | 2     | 0.4         | Utrn                                                                     | Cytoskeleton         |
| DMR1:11903501  | 1   | 11903501  | 12300  | 1         | 4.94E-08    | 0.528         | 1401  | 11.3902     | RF00002;RF01518                                                          |                      |
| DMR1:11924501  | 1   | 11924501  | 1400   | 1         | 1.53E-07    | 1.636         | 21    | 1.5         | RF01518                                                                  |                      |
| DMR1:11962001  | 1   | 11962001  | 14200  | 2         | 1.50E-08    | 0.491         | 1494  | 10.5211     | RF01518;AABR07000398.1;RF00002;AABR07000402.1;AABR07000404.1;LOC10090959 |                      |
| DMR1:13485401  | 1   | 13485401  | 2100   | 1         | 9.44E-07    | 1.688         | 42    | 2           |                                                                          |                      |
| DMR1:21773001  | 1   | 21773001  | 1100   | 1         | 2.67E-07    | 1.636         | 1     | 0.0909      | Enpp1                                                                    | Signaling            |
| DMR1:22677801  | 1   | 22677801  | 1800   | 1         | 3.89E-07    | 0.257         | 81    | 4.5         |                                                                          |                      |
| DMR1:24547301  | 1   | 24547301  | 300    | 1         | 7.62E-07    | 0.429         | 5     | 1.6667      |                                                                          |                      |
| DMR1:26469701  | 1   | 26469701  | 300    | 1         | 8.88E-07    | 1.679         | 3     | 1           |                                                                          |                      |
| DMR1:26565201  | 1   | 26565201  | 1600   | 1         | 5.11E-08    | 2.167         | 12    | 0.75        |                                                                          |                      |
| DMR1:33368301  | 1   | 33368301  | 800    | 1         | 7.50E-07    | 1.467         | 5     | 0.625       |                                                                          |                      |
| DMR1:38442401  | 1   | 38442401  | 3700   | 1         | 3.19E-07    | 1.411         | 56    | 1.5135      |                                                                          |                      |
| DMR1:43865101  | 1   | 43865101  | 200    | 1         | 2.07E-08    | 1.766         | 0     | 0           | Cnksr3                                                                   | Signaling            |
| DMR1:45440901  | 1   | 45440901  | 400    | 1         | 5.78E-09    | 2.203         | 1     | 0.25        |                                                                          |                      |
| DMR1:53670001  | 1   | 53670001  | 1000   | 1         | 8.33E-07    | 2.681         | 6     | 0.6         |                                                                          |                      |
| DMR1:54423001  | 1   | 54423001  | 4800   | 1         | 2.00E-11    | 0.617         | 58    | 1.2083      |                                                                          |                      |
| DMR1:70613801  | 1   | 70613801  | 300    | 1         | 5.87E-07    | 1.991         | 5     | 1.6667      |                                                                          |                      |
| DMR1:80429801  | 1   | 80429801  | 900    | 1         | 5.70E-07    | 0.347         | 21    | 2.3333      | Trappc6a;Nkpd1;Ppp1r37                                                   | Metabolism           |
| DMR1:83519901  | 1   | 83519901  | 500    | 1         | 3.05E-08    | 2.539         | 0     | 0           | Cyp2b12                                                                  | Metabolism           |
| DMR1:83834001  | 1   | 83834001  | 900    | 1         | 2.35E-07    | 1.804         | 5     | 0.5556      |                                                                          |                      |
| DMR1:87061301  | 1   | 87061301  | 700    | 1         | 3.25E-07    | 1.757         | 4     | 0.5714      | Capn12                                                                   | Protease             |
| DMR1:88820101  | 1   | 88820101  | 3400   | 1         | 1.14E-08    | 0.365         | 53    | 1.5588      | Lrfn3;RF00004                                                            | Receptor             |
| DMR1:92061201  | 1   | 92061201  | 1300   | 1         | 7.75E-07    | 0.492         | 37    | 2.8462      | Dpy19l3                                                                  | Development          |
| DMR1:93885401  | 1   | 93885401  | 1500   | 1         | 7.93E-08    | 0.279         | 19    | 1.2667      | Zfp536                                                                   | Transcription        |
| DMR1:96331701  | 1   | 96331701  | 600    | 1         | 7.09E-07    | 1.518         | 2     | 0.3333      |                                                                          |                      |
| DMR1:143481101 | 1   | 143481101 | 300    | 1         | 1.32E-07    | 1.491         | 0     | 0           | Homer2                                                                   | Signaling            |
| DMR1:147112401 | 1   | 147112401 | 1700   | 1         | 8.71E-11    | 0.495         | 130   | 7.6471      |                                                                          |                      |
| DMR1:161286801 | 1   | 161286801 | 600    | 1         | 1.13E-07    | 0.344         | 5     | 0.8333      | AABR07004852.1                                                           |                      |
| DMR1:161748001 | 1   | 161748001 | 700    | 1         | 6.82E-07    | 0.35          | 16    | 2.2857      | Tenm4                                                                    | Signaling            |
| DMR1:173467701 | 1   | 173467701 | 100    | 1         | 8.42E-07    | 5.617         | 0     | 0           | Olr281                                                                   | Receptor             |
| DMR1:173805901 | 1   | 173805901 | 3700   | 1         | 7.82E-07    | 1.367         | 51    | 1.3784      |                                                                          |                      |
| DMR1:176415901 | 1   | 176415901 | 300    | 1         | 3.24E-07    | 1.686         | 1     | 0.3333      | Gaint18                                                                  | Unknown              |
| DMR1:182837501 | 1   | 182837501 | 2600   | 1         | 1.42E-07    | 2.409         | 30    | 1.1538      | AABR07005416.1;Ssty1                                                     |                      |
| DMR1:192839501 | 1   | 192839501 | 1100   | 1         | 6.98E-07    | 3.926         | 3     | 0.2727      |                                                                          |                      |
| DMR1:201859301 | 1   | 201859301 | 500    | 1         | 3.16E-07    | 2.2           | 3     | 0.6         | AC123083.1                                                               |                      |
| DMR1:213528201 | 1   | 213528201 | 400    | 1         | 5.06E-08    | 2.048         | 0     | 0           | Cyp2e1;Syce1                                                             | Metabolism           |
| DMR1:221336401 | 1   | 221336401 | 400    | 1         | 4.08E-07    | 1.522         | 0     | 0           | Slc22a20;Capn1                                                           | Transport;Protease   |
| DMR1:223731001 | 1   | 223731001 | 4700   | 1         | 1.82E-08    | 0.37          | 57    | 1.2128      |                                                                          |                      |
| DMR1:240706601 | 1   | 240706601 | 200    | 1         | 2.38E-07    | 0.185         | 8     | 4           | Trpm3                                                                    | Receptor             |
| DMR1:244850501 | 1   | 244850501 | 500    | 1         | 5.06E-08    | 1.613         | 1     | 0.2         |                                                                          |                      |
| DMR1:249595501 | 1   | 249595501 | 1400   | 1         | 2.24E-07    | 1.773         | 15    | 1.0714      |                                                                          |                      |
| DMR1:257403401 | 1   | 257403401 | 400    | 1         | 9.75E-07    | 0.276         | 11    | 2.75        | Plce1                                                                    | Signaling            |
| DMR1:260430301 | 1   | 260430301 | 1100   | 1         | 1.54E-07    | 0.41          | 26    | 2.3636      | Tli2                                                                     | Protease             |
| DMR1:269146001 | 1   | 269146001 | 300    | 1         | 6.91E-07    | 0.181         | 5     | 1.6667      |                                                                          |                      |
| DMR1:273800601 | 1   | 273800601 | 1000   | 1         | 1.06E-07    | 2.136         | 3     | 0.3         |                                                                          |                      |
| DMR1:281015501 | 1   | 281015501 | 600    | 1         | 2.41E-08    | 1.603         | 0     | 0           |                                                                          |                      |
| DMR2:269301    | 2   | 269301    | 800    | 1         | 5.29E-07    | 0.423         | 24    | 3           |                                                                          |                      |
| DMR2:12498501  | 2   | 12498501  | 1300   | 1         | 2.67E-07    | 2.468         | 4     | 0.3077      |                                                                          |                      |
| DMR2:18122801  | 2   | 18122801  | 600    | 1         | 3.28E-08    | 2.684         | 6     | 1           | Edil3                                                                    | Extracellular Matrix |
| DMR2:26359301  | 2   | 26359301  | 100    | 1         | 6.38E-07    | 5.901         | 0     | 0           | Iqgap2                                                                   | Signaling            |
| DMR2:29742901  | 2   | 29742901  | 600    | 2         | 1.24E-07    | 1.689         | 1     | 0.1667      | Map1b                                                                    | Cytoskeleton         |
| DMR2:54711101  | 2   | 54711101  | 1400   | 1         | 2.12E-07    | 1.483         | 12    | 0.8571      | C7                                                                       | Immune               |
| DMR2:77620501  | 2   | 77620501  | 400    | 1         | 8.80E-07    | 0.381         | 8     | 2           | Basp1                                                                    |                      |
| DMR2:128814901 | 2   | 128814901 | 4800   | 1         | 8.21E-07    | 0.478         | 255   | 5.3125      | RF00002                                                                  |                      |
| DMR2:156979201 | 2   | 156979201 | 21100  | 1         | 2.67E-07    | 0.416         | 811   | 3.8436      |                                                                          |                      |
| DMR2:165233401 | 2   | 165233401 | 1500   | 1         | 9.98E-09    | 0.461         | 49    | 3.2667      |                                                                          |                      |
| DMR2:178343601 | 2   | 178343601 | 600    | 1         | 3.93E-07    | 2.204         | 2     | 0.3333      | Frip2;AC121415.2                                                         |                      |
| DMR2:195030801 | 2   | 195030801 | 900    | 1         | 5.87E-07    | 2.273         | 1     | 0.1111      | AABR07012426.1                                                           |                      |
| DMR2:198329701 | 2   | 198329701 | 500    | 1         | 2.24E-07    | 0.511         | 8     | 1.6         | Sv2a;Bola1                                                               | Development          |
| DMR2:201701201 | 2   | 201701201 | 300    | 1         | 1.79E-08    | 2.903         | 3     | 1           |                                                                          |                      |
| DMR2:207706801 | 2   | 207706801 | 600    | 1         | 4.88E-08    | 1.802         | 0     | 0           |                                                                          |                      |
| DMR2:213051201 | 2   | 213051201 | 700    | 1         | 8.42E-08    | 2.352         | 1     | 0.1429      |                                                                          |                      |

|                |   |           |       |   |          |       |      |         |                                |                            |
|----------------|---|-----------|-------|---|----------|-------|------|---------|--------------------------------|----------------------------|
| DMR2:215418901 | 2 | 215418901 | 600   | 1 | 1.76E-07 | 1.886 | 3    | 0.5     |                                |                            |
| DMR2:225061601 | 2 | 225061601 | 700   | 1 | 9.37E-07 | 0.388 | 9    | 1.2857  | Slc44a3;AABR07013154.1         | Metabolism                 |
| DMR2:236372001 | 2 | 236372001 | 800   | 1 | 9.97E-09 | 1.744 | 6    | 0.75    | Hadh                           | Metabolism                 |
| DMR2:252443801 | 2 | 252443801 | 2400  | 1 | 9.47E-07 | 0.158 | 38   | 1.5833  | Dnase2b;Uox                    | Transcription              |
| DMR2:260855401 | 2 | 260855401 | 600   | 1 | 1.89E-07 | 2.024 | 0    | 0       | Tyw3                           |                            |
| DMR2:262997701 | 2 | 262997701 | 200   | 1 | 9.02E-07 | 2.255 | 4    | 2       | Negr1                          | Growth Factors & Cytokines |
| DMR3:8082001   | 3 | 8082001   | 600   | 1 | 1.55E-07 | 1.494 | 2    | 0.3333  |                                |                            |
| DMR3:9289801   | 3 | 9289801   | 800   | 1 | 6.48E-07 | 0.336 | 16   | 2       | Lamc3                          | Extracellular Matrix       |
| DMR3:38318401  | 3 | 38318401  | 300   | 1 | 7.30E-08 | 1.44  | 1    | 0.3333  |                                |                            |
| DMR3:60362001  | 3 | 60362001  | 1600  | 1 | 5.35E-09 | 1.817 | 18   | 1.125   | RF00001                        |                            |
| DMR3:63144701  | 3 | 63144701  | 1200  | 1 | 2.00E-09 | 2.552 | 7    | 0.5833  | Cyct                           |                            |
| DMR3:80960201  | 3 | 80960201  | 400   | 1 | 9.36E-07 | 3.082 | 2    | 0.5     | AC135645.2                     |                            |
| DMR3:102221201 | 3 | 102221201 | 200   | 1 | 1.47E-07 | 2.078 | 1    | 0.5     |                                |                            |
| DMR3:117494601 | 3 | 117494601 | 500   | 1 | 2.06E-07 | 1.826 | 0    | 0       | Slc12a1                        | Transport                  |
| DMR3:118527001 | 3 | 118527001 | 1400  | 1 | 1.28E-07 | 1.991 | 19   | 1.3571  |                                |                            |
| DMR3:121740801 | 3 | 121740801 | 500   | 2 | 1.41E-07 | 0.32  | 7    | 1.4     | Slc20a1                        | Metabolism                 |
| DMR3:121939801 | 3 | 121939801 | 1300  | 1 | 7.39E-07 | 0.36  | 35   | 2.6923  |                                |                            |
| DMR3:124492801 | 3 | 124492801 | 600   | 1 | 2.59E-07 | 1.989 | 6    | 1       |                                |                            |
| DMR3:124769001 | 3 | 124769001 | 600   | 1 | 7.00E-07 | 0.371 | 20   | 3.3333  |                                |                            |
| DMR3:135369301 | 3 | 135369301 | 1100  | 1 | 4.47E-07 | 2.553 | 6    | 0.5455  |                                |                            |
| DMR3:153044501 | 3 | 153044501 | 700   | 1 | 8.17E-07 | 2.335 | 5    | 0.7143  | Ndr3                           | Transcription              |
| DMR3:164466501 | 3 | 164466501 | 700   | 1 | 2.01E-07 | 2.36  | 6    | 0.8571  |                                |                            |
| DMR3:166106601 | 3 | 166106601 | 400   | 1 | 2.95E-08 | 1.934 | 3    | 0.75    |                                |                            |
| DMR3:169649101 | 3 | 169649101 | 400   | 1 | 5.59E-08 | 0.301 | 14   | 3.5     | AABR07054801.1                 |                            |
| DMR3:169745301 | 3 | 169745301 | 1400  | 1 | 3.11E-08 | 5.502 | 19   | 1.3571  |                                |                            |
| DMR3:174105101 | 3 | 174105101 | 400   | 1 | 4.35E-07 | 0.302 | 12   | 3       |                                |                            |
| DMR3:176937901 | 3 | 176937901 | 900   | 1 | 1.85E-08 | 1.935 | 1    | 0.1111  | Zbtb46;RF00026                 | Transcription              |
| DMR4:4782901   | 4 | 4782901   | 300   | 1 | 1.17E-07 | 1.784 | 2    | 0.6667  |                                |                            |
| DMR4:5643001   | 4 | 5643001   | 800   | 1 | 2.91E-07 | 1.953 | 6    | 0.75    | Actr3b                         | Cytoskeleton               |
| DMR4:9717901   | 4 | 9717901   | 400   | 1 | 6.83E-07 | 0.483 | 12   | 3       | Reln                           | Protease                   |
| DMR4:25755101  | 4 | 25755101  | 600   | 2 | 2.11E-07 | 1.581 | 3    | 0.5     |                                |                            |
| DMR4:31254401  | 4 | 31254401  | 1200  | 1 | 4.55E-09 | 0.417 | 35   | 2.9167  | AABR07059663.1                 |                            |
| DMR4:33054601  | 4 | 33054601  | 500   | 1 | 1.70E-07 | 0.233 | 13   | 2.6     |                                |                            |
| DMR4:45947001  | 4 | 45947001  | 200   | 1 | 4.23E-07 | 3.859 | 1    | 0.5     |                                |                            |
| DMR4:48455001  | 4 | 48455001  | 400   | 1 | 1.84E-07 | 0.486 | 12   | 3       |                                |                            |
| DMR4:59957001  | 4 | 59957001  | 500   | 1 | 1.64E-07 | 0.301 | 11   | 2.2     |                                |                            |
| DMR4:77408001  | 4 | 77408001  | 4300  | 1 | 8.66E-08 | 1.438 | 98   | 2.2791  | AABR07060519.1                 |                            |
| DMR4:77413601  | 4 | 77413601  | 1000  | 2 | 1.64E-07 | 1.448 | 13   | 1.3     | AABR07060519.1                 |                            |
| DMR4:80607301  | 4 | 80607301  | 300   | 1 | 4.14E-07 | 2.151 | 3    | 1       |                                |                            |
| DMR4:82035201  | 4 | 82035201  | 1400  | 1 | 1.01E-07 | 1.545 | 0    | 0       |                                |                            |
| DMR4:118576401 | 4 | 118576401 | 600   | 1 | 7.48E-07 | 1.721 | 2    | 0.3333  | Anxa4                          | Binding Protein            |
| DMR4:119145201 | 4 | 119145201 | 1200  | 1 | 1.86E-07 | 1.834 | 13   | 1.0833  | Gkn1                           |                            |
| DMR4:119180901 | 4 | 119180901 | 1100  | 1 | 3.01E-07 | 2.183 | 1    | 0.0909  | Gkn2;Gkn3                      |                            |
| DMR4:127464001 | 4 | 127464001 | 600   | 1 | 2.44E-08 | 2.186 | 6    | 1       |                                |                            |
| DMR4:130474101 | 4 | 130474101 | 500   | 1 | 3.94E-08 | 1.772 | 4    | 0.8     |                                |                            |
| DMR4:145610801 | 4 | 145610801 | 300   | 1 | 4.13E-07 | 0.254 | 9    | 3       | Irak2                          | Receptor                   |
| DMR4:166666201 | 4 | 166666201 | 3100  | 1 | 3.72E-09 | 0.544 | 169  | 5.4516  | RF00002                        |                            |
| DMR4:178058001 | 4 | 178058001 | 700   | 1 | 2.72E-07 | 2.223 | 10   | 1.4286  | Sox5                           | Transcription              |
| DMR4:178065401 | 4 | 178065401 | 2200  | 1 | 9.75E-07 | 0.267 | 62   | 2.8182  | Sox5                           | Transcription              |
| DMR5:16330501  | 5 | 16330501  | 3200  | 1 | 8.31E-07 | 0.475 | 97   | 3.0312  |                                |                            |
| DMR5:27070301  | 5 | 27070301  | 1800  | 3 | 4.67E-09 | 1.642 | 10   | 0.5556  |                                |                            |
| DMR5:27389301  | 5 | 27389301  | 300   | 1 | 2.69E-07 | 1.538 | 2    | 0.6667  | Runx1t1                        | Transcription              |
| DMR5:44965101  | 5 | 44965101  | 800   | 1 | 8.44E-08 | 4.87  | 2    | 0.25    |                                |                            |
| DMR5:46735501  | 5 | 46735501  | 300   | 1 | 1.53E-07 | 2.561 | 1    | 0.3333  |                                |                            |
| DMR5:56849001  | 5 | 56849001  | 1100  | 1 | 4.55E-07 | 0.213 | 15   | 1.3636  |                                |                            |
| DMR5:58381201  | 5 | 58381201  | 800   | 1 | 3.12E-07 | 0.146 | 28   | 3.5     | Phf24                          |                            |
| DMR5:58844701  | 5 | 58844701  | 1100  | 1 | 5.48E-07 | 1.816 | 14   | 1.2727  | Rusc2                          |                            |
| DMR5:79000201  | 5 | 79000201  | 300   | 1 | 2.33E-07 | 2.378 | 1    | 0.3333  | Kif12                          | Cytoskeleton               |
| DMR5:84276301  | 5 | 84276301  | 300   | 1 | 7.56E-07 | 0.201 | 4    | 1.3333  |                                |                            |
| DMR5:91123801  | 5 | 91123801  | 14200 | 1 | 7.40E-07 | 0.426 | 1605 | 11.3028 | RF01518;RF00002;AABR07048791.1 |                            |
| DMR5:93806601  | 5 | 93806601  | 400   | 1 | 4.45E-07 | 7.333 | 4    | 1       | AABR07048856.1                 |                            |
| DMR5:107335401 | 5 | 107335401 | 300   | 1 | 8.52E-07 | 2.816 | 1    | 0.3333  | Klh9                           | Transcription              |
| DMR5:141613901 | 5 | 141613901 | 1000  | 1 | 3.42E-07 | 1.731 | 6    | 0.6     |                                |                            |
| DMR5:149313601 | 5 | 149313601 | 300   | 1 | 4.87E-07 | 2.058 | 0    | 0       |                                |                            |
| DMR5:149684401 | 5 | 149684401 | 400   | 1 | 2.21E-07 | 1.868 | 2    | 0.5     | AABR07050061.1                 |                            |
| DMR5:151058701 | 5 | 151058701 | 400   | 1 | 2.67E-07 | 0.416 | 10   | 2.5     | Stx12                          | Transport                  |
| DMR5:153078601 | 5 | 153078601 | 900   | 1 | 4.40E-07 | 2.008 | 11   | 1.2222  |                                |                            |
| DMR5:154051801 | 5 | 154051801 | 600   | 1 | 1.92E-07 | 1.605 | 2    | 0.3333  | Ifnlr1                         | Receptor                   |
| DMR5:166409301 | 5 | 166409301 | 2500  | 1 | 5.88E-08 | 0.478 | 59   | 2.36    | Nmnat1                         | Metabolism                 |

|                |   |           |       |   |          |       |     |         |                                                                                    |                                        |
|----------------|---|-----------|-------|---|----------|-------|-----|---------|------------------------------------------------------------------------------------|----------------------------------------|
| DMR5:167681101 | 5 | 167681101 | 900   | 1 | 5.69E-07 | 0.462 | 34  | 3.7778  | Slc45a1                                                                            | Transport                              |
| DMR5:169559101 | 5 | 169559101 | 400   | 1 | 2.00E-07 | 0.291 | 15  | 3.75    | Chd5                                                                               | Transcription                          |
| DMR5:171146901 | 5 | 171146901 | 900   | 1 | 5.72E-07 | 0.35  | 15  | 1.6667  | RF00560                                                                            |                                        |
| DMR5:171761001 | 5 | 171761001 | 300   | 1 | 9.84E-07 | 1.416 | 0   | 0       |                                                                                    |                                        |
| DMR6:3469901   | 6 | 3469901   | 3100  | 1 | 7.77E-09 | 2.009 | 12  | 0.3871  |                                                                                    |                                        |
| DMR6:10465901  | 6 | 10465901  | 1900  | 2 | 3.60E-07 | 0.479 | 85  | 4.4737  |                                                                                    |                                        |
| DMR6:10805801  | 6 | 10805801  | 9900  | 1 | 6.71E-09 | 0.328 | 426 | 4.303   |                                                                                    |                                        |
| DMR6:14859601  | 6 | 14859601  | 200   | 1 | 2.80E-07 | 4.77  | 1   | 0.5     | Nrxn1                                                                              | Receptor                               |
| DMR6:21445501  | 6 | 21445501  | 800   | 1 | 6.13E-08 | 0.367 | 15  | 1.875   | Ltbp1                                                                              | Metabolism                             |
| DMR6:24196401  | 6 | 24196401  | 400   | 2 | 1.16E-07 | 1.805 | 2   | 0.5     | AABR07063248.1                                                                     |                                        |
| DMR6:30628001  | 6 | 30628001  | 7400  | 1 | 1.92E-10 | 0.313 | 788 | 10.6486 | RF00002;AABR07063421.1;AABR07063424.1;AABR07063425.3;AABR07063425.2;AABR07063425.1 |                                        |
| DMR6:30638101  | 6 | 30638101  | 1100  | 2 | 3.47E-09 | 0.534 | 113 | 10.2727 | RF00002;AABR07063421.1;AABR07063424.1;AABR07063425.3;AABR07063425.2;AABR07063425.1 |                                        |
| DMR6:31062601  | 6 | 31062601  | 3700  | 1 | 2.08E-07 | 1.831 | 68  | 1.8378  |                                                                                    |                                        |
| DMR6:41997201  | 6 | 41997201  | 400   | 1 | 6.91E-07 | 0.197 | 10  | 2.5     | Greb1                                                                              |                                        |
| DMR6:43304801  | 6 | 43304801  | 200   | 1 | 7.61E-07 | 4.323 | 5   | 2.5     | Asap2                                                                              | Development                            |
| DMR6:100611801 | 6 | 100611801 | 600   | 1 | 7.05E-07 | 0.539 | 11  | 1.8333  |                                                                                    |                                        |
| DMR6:103939401 | 6 | 103939401 | 1700  | 1 | 2.33E-07 | 3.753 | 12  | 0.7059  | LOC500684;AABR07065012.1                                                           | Translation                            |
| DMR6:107010601 | 6 | 107010601 | 600   | 1 | 1.11E-07 | 0.369 | 16  | 2.6667  | Dcaf4                                                                              |                                        |
| DMR6:108431201 | 6 | 108431201 | 400   | 1 | 3.64E-07 | 2.117 | 6   | 1.5     |                                                                                    |                                        |
| DMR6:128247801 | 6 | 128247801 | 600   | 1 | 9.11E-08 | 2.515 | 2   | 0.3333  |                                                                                    |                                        |
| DMR6:134183901 | 6 | 134183901 | 200   | 1 | 6.73E-07 | 0.312 | 9   | 4.5     |                                                                                    |                                        |
| DMR6:134844001 | 6 | 134844001 | 1600  | 1 | 2.11E-07 | 0.172 | 50  | 3.125   | Ppp2r5c                                                                            | Signaling                              |
| DMR6:134973201 | 6 | 134973201 | 2500  | 1 | 6.80E-07 | 0.279 | 89  | 3.56    | Dync1h1                                                                            | Cytoskeleton                           |
| DMR6:145543401 | 6 | 145543401 | 400   | 1 | 1.53E-07 | 0.191 | 5   | 1.25    | Rapgef5                                                                            | Development                            |
| DMR6:145926101 | 6 | 145926101 | 300   | 1 | 6.76E-07 | 3.642 | 17  | 5.6667  | Dnah11                                                                             | Cytoskeleton                           |
| DMR6:146250601 | 6 | 146250601 | 1600  | 1 | 2.22E-11 | 4.875 | 29  | 1.8125  |                                                                                    |                                        |
| DMR7:710101    | 7 | 710101    | 4400  | 2 | 5.03E-09 | 0.572 | 254 | 5.7727  | RF00002                                                                            |                                        |
| DMR7:732401    | 7 | 732401    | 2900  | 1 | 2.25E-08 | 0.399 | 116 | 4       |                                                                                    |                                        |
| DMR7:1621201   | 7 | 1621201   | 10700 | 2 | 4.13E-07 | 0.581 | 334 | 3.1215  | RF00002                                                                            |                                        |
| DMR7:1673001   | 7 | 1673001   | 5500  | 1 | 5.16E-08 | 0.573 | 328 | 5.9636  |                                                                                    |                                        |
| DMR7:2220101   | 7 | 2220101   | 3300  | 1 | 6.73E-08 | 0.484 | 117 | 3.5455  | RF00002                                                                            |                                        |
| DMR7:12384701  | 7 | 12384701  | 2700  | 1 | 2.38E-07 | 0.388 | 46  | 1.7037  | Efna2                                                                              | Signaling                              |
| DMR7:16630501  | 7 | 16630501  | 200   | 1 | 1.59E-07 | 2.334 | 1   | 0.5     |                                                                                    |                                        |
| DMR7:22452301  | 7 | 22452301  | 2900  | 2 | 8.57E-08 | 0.52  | 131 | 4.5172  | RF00002                                                                            |                                        |
| DMR7:24058301  | 7 | 24058301  | 2100  | 2 | 2.09E-09 | 1.656 | 47  | 2.2381  | Btbd11                                                                             | Signaling                              |
| DMR7:25870701  | 7 | 25870701  | 1400  | 1 | 3.18E-07 | 1.839 | 25  | 1.7857  | Rfx4                                                                               | Transcription                          |
| DMR7:32478801  | 7 | 32478801  | 400   | 1 | 9.77E-07 | 1.956 | 0   | 0       | AABR07056616.1;RF00001                                                             |                                        |
| DMR7:54513101  | 7 | 54513101  | 200   | 1 | 2.37E-07 | 2.161 | 0   | 0       |                                                                                    |                                        |
| DMR7:62713901  | 7 | 62713901  | 1600  | 1 | 4.52E-08 | 2.035 | 17  | 1.0625  |                                                                                    |                                        |
| DMR7:62894501  | 7 | 62894501  | 600   | 1 | 1.22E-07 | 0.41  | 14  | 2.3333  | Msrb3                                                                              | Metabolism                             |
| DMR7:72581601  | 7 | 72581601  | 900   | 1 | 7.99E-08 | 0.396 | 14  | 1.5556  |                                                                                    |                                        |
| DMR7:75438701  | 7 | 75438701  | 300   | 1 | 2.94E-07 | 2.749 | 4   | 1.3333  |                                                                                    |                                        |
| DMR7:82819301  | 7 | 82819301  | 600   | 1 | 2.60E-07 | 1.794 | 3   | 0.5     |                                                                                    |                                        |
| DMR7:96702701  | 7 | 96702701  | 500   | 2 | 6.41E-10 | 1.463 | 1   | 0.2     |                                                                                    |                                        |
| DMR7:99269501  | 7 | 99269501  | 1700  | 1 | 6.88E-08 | 1.858 | 7   | 0.4118  |                                                                                    |                                        |
| DMR7:117236501 | 7 | 117236501 | 5900  | 1 | 9.81E-07 | 0.344 | 342 | 5.7966  | Plec                                                                               | Cytoskeleton                           |
| DMR7:130333101 | 7 | 130333101 | 300   | 1 | 3.12E-07 | 1.479 | 2   | 0.6667  | Lmf2;Ncaph2;Tymp                                                                   | Translation;Metabolism                 |
| DMR7:135823401 | 7 | 135823401 | 400   | 1 | 7.15E-07 | 0.484 | 12  | 3       | Irak4                                                                              | Signaling                              |
| DMR7:136200601 | 7 | 136200601 | 500   | 1 | 9.29E-07 | 0.315 | 13  | 2.6     | Tmem117                                                                            | Unknown                                |
| DMR7:142251801 | 7 | 142251801 | 1900  | 1 | 6.98E-07 | 0.27  | 38  | 2       | Dazap2;Smagp                                                                       |                                        |
| DMR8:10458701  | 8 | 10458701  | 1400  | 1 | 1.08E-07 | 0.31  | 14  | 1       |                                                                                    |                                        |
| DMR8:13505601  | 8 | 13505601  | 300   | 1 | 9.34E-07 | 1.978 | 6   | 2       | LOC108348070                                                                       |                                        |
| DMR8:14457301  | 8 | 14457301  | 300   | 1 | 3.77E-07 | 3.047 | 3   | 1       | Fat3                                                                               | Transcription                          |
| DMR8:36322201  | 8 | 36322201  | 300   | 1 | 2.38E-07 | 0.185 | 12  | 4       | St3gal4;Dcps                                                                       | Metabolism                             |
| DMR8:47314001  | 8 | 47314001  | 1400  | 1 | 5.30E-07 | 0.451 | 33  | 2.3571  | Arhgef12                                                                           | Signaling                              |
| DMR8:51020501  | 8 | 51020501  | 200   | 1 | 4.36E-07 | 2.504 | 0   | 0       |                                                                                    |                                        |
| DMR8:52753901  | 8 | 52753901  | 1400  | 1 | 8.49E-07 | 2.104 | 12  | 0.8571  | Nxpe1                                                                              |                                        |
| DMR8:54439901  | 8 | 54439901  | 500   | 1 | 1.01E-07 | 1.807 | 3   | 0.6     |                                                                                    |                                        |
| DMR8:59384401  | 8 | 59384401  | 700   | 1 | 1.05E-08 | 1.989 | 3   | 0.4286  |                                                                                    |                                        |
| DMR8:62228901  | 8 | 62228901  | 200   | 1 | 2.80E-07 | 2.212 | 1   | 0.5     | Scamp5                                                                             | Metabolism                             |
| DMR8:62371001  | 8 | 62371001  | 1400  | 1 | 5.16E-07 | 0.386 | 27  | 1.9286  | Scamp2;Ulk3;Cplx3                                                                  | Binding Protein;Development;Metabolism |
| DMR8:68416701  | 8 | 68416701  | 100   | 1 | 6.27E-07 | 0.166 | 3   | 3       | lqch                                                                               |                                        |

|                 |    |           |      |   |          |        |    |        |                               |                          |
|-----------------|----|-----------|------|---|----------|--------|----|--------|-------------------------------|--------------------------|
| DMR8:72801301   | 8  | 72801301  | 300  | 1 | 1.82E-08 | 2.263  | 6  | 2      |                               |                          |
| DMR8:75345401   | 8  | 75345401  | 200  | 1 | 3.21E-07 | 2.383  | 2  | 1      |                               |                          |
| DMR8:121474601  | 8  | 121474601 | 700  | 1 | 5.46E-08 | 1.675  | 1  | 0.1429 |                               |                          |
| DMR8:124241701  | 8  | 124241701 | 600  | 1 | 2.11E-07 | 1.481  | 2  | 0.3333 |                               |                          |
| DMR8:126981701  | 8  | 126981701 | 1800 | 1 | 2.63E-07 | 1.75   | 10 | 0.5556 | AABR07071701.1                |                          |
| DMR8:127483901  | 8  | 127483901 | 1300 | 1 | 6.12E-08 | 0.338  | 32 | 2.4615 | Itga9                         | Extracellular Matrix     |
| DMR8:128895301  | 8  | 128895301 | 400  | 1 | 4.26E-07 | 1.722  | 2  | 0.5    | AABR07071745.1                |                          |
| DMR9:1649301    | 9  | 1649301   | 200  | 1 | 8.67E-07 | 0.421  | 13 | 6.5    | Tbc1d5                        | Signaling                |
| DMR9:3732501    | 9  | 3732501   | 800  | 1 | 5.40E-07 | 1.453  | 5  | 0.625  |                               |                          |
| DMR9:11934201   | 9  | 11934201  | 500  | 1 | 2.35E-07 | 1.932  | 7  | 1.4    |                               |                          |
| DMR9:18053901   | 9  | 18053901  | 400  | 1 | 3.21E-07 | 0.295  | 10 | 2.5    |                               |                          |
| DMR9:19377701   | 9  | 19377701  | 2000 | 1 | 3.63E-07 | 1.572  | 18 | 0.9    | Clic5                         | Transport                |
| DMR9:20527501   | 9  | 20527501  | 1400 | 1 | 9.55E-07 | 1.7    | 11 | 0.7857 | AABR07066871.2;AABR07066871.3 |                          |
| DMR9:21334601   | 9  | 21334601  | 300  | 1 | 2.04E-11 | 1.887  | 2  | 0.6667 | Ptchd4                        | Unknown                  |
| DMR9:37552801   | 9  | 37552801  | 400  | 1 | 1.17E-08 | 1.896  | 0  | 0      |                               |                          |
| DMR9:41220101   | 9  | 41220101  | 1100 | 2 | 3.57E-07 | 2.049  | 7  | 0.6364 |                               |                          |
| DMR9:42127701   | 9  | 42127701  | 400  | 1 | 4.50E-07 | 0.25   | 6  | 1.5    |                               |                          |
| DMR9:42506901   | 9  | 42506901  | 1900 | 1 | 3.47E-07 | 1.342  | 27 | 1.4211 |                               |                          |
| DMR9:45953801   | 9  | 45953801  | 700  | 1 | 8.56E-08 | 1.716  | 8  | 1.1429 | Npas2                         | Transcription            |
| DMR9:54612901   | 9  | 54612901  | 1600 | 1 | 9.84E-07 | 0.404  | 30 | 1.875  | Myo1b                         | Cytoskeleton             |
| DMR9:62623501   | 9  | 62623501  | 300  | 1 | 3.28E-07 | 2.332  | 3  | 1      |                               |                          |
| DMR9:79873501   | 9  | 79873501  | 400  | 1 | 4.38E-08 | 1.844  | 1  | 0.25   |                               | 4-Mar Metabolism         |
| DMR9:81453401   | 9  | 81453401  | 500  | 1 | 3.34E-07 | 0.354  | 16 | 3.2    |                               |                          |
| DMR9:98353901   | 9  | 98353901  | 1600 | 1 | 7.56E-07 | 1.742  | 15 | 0.9375 | Ramp1                         | Signaling                |
| DMR9:99648301   | 9  | 99648301  | 400  | 1 | 3.28E-09 | 0.129  | 10 | 2.5    | Ndufa10l1;Olr1343             | Metabolism;Receptor      |
| DMR9:102810801  | 9  | 102810801 | 900  | 1 | 1.25E-10 | 1.86   | 9  | 1      |                               |                          |
| DMR9:104915101  | 9  | 104915101 | 600  | 1 | 8.75E-08 | 1.694  | 1  | 0.1667 |                               |                          |
| DMR9:110664601  | 9  | 110664601 | 400  | 1 | 9.81E-07 | 0.352  | 14 | 3.5    | Fbxl17                        | Proteolysis              |
| DMR10:5314901   | 10 | 5314901   | 2700 | 1 | 7.40E-07 | 1.712  | 49 | 1.8148 | Tvp23a                        |                          |
| DMR10:29115601  | 10 | 29115601  | 100  | 1 | 9.75E-07 | 3.511  | 0  | 0      | Ccnjl                         | Signaling                |
| DMR10:31609001  | 10 | 31609001  | 300  | 1 | 7.46E-07 | 3.247  | 2  | 0.6667 | LOC100359777                  |                          |
| DMR10:45457801  | 10 | 45457801  | 1100 | 1 | 2.62E-07 | 1.628  | 14 | 1.2727 | Obscn                         | Unknown                  |
| DMR10:45913001  | 10 | 45913001  | 200  | 1 | 4.12E-07 | 3.381  | 1  | 0.5    | Nlrp3;Olr1462                 | Unknown                  |
| DMR10:54022701  | 10 | 54022701  | 400  | 1 | 8.94E-07 | 0.284  | 12 | 3      |                               |                          |
| DMR10:55817201  | 10 | 55817201  | 800  | 1 | 9.39E-07 | 0.425  | 14 | 1.75   |                               |                          |
| DMR10:56142401  | 10 | 56142401  | 1000 | 1 | 2.58E-07 | 1.644  | 9  | 0.9    | Dnah2                         | Cytoskeleton             |
| DMR10:68253301  | 10 | 68253301  | 800  | 1 | 2.90E-07 | 1.536  | 9  | 1.125  | Asic2                         | Transport                |
| DMR10:68992201  | 10 | 68992201  | 600  | 1 | 1.63E-07 | 0.285  | 17 | 2.8333 |                               |                          |
| DMR10:76850301  | 10 | 76850301  | 900  | 1 | 6.66E-07 | 1.515  | 2  | 0.2222 |                               |                          |
| DMR10:83007601  | 10 | 83007601  | 700  | 1 | 3.11E-08 | 1.534  | 2  | 0.2857 |                               |                          |
| DMR10:84050801  | 10 | 84050801  | 500  | 1 | 1.58E-07 | 1.465  | 2  | 0.4    |                               |                          |
| DMR10:84522701  | 10 | 84522701  | 300  | 1 | 6.45E-07 | 2.596  | 2  | 0.6667 | Skap1                         |                          |
| DMR10:89809001  | 10 | 89809001  | 1200 | 1 | 1.95E-07 | 2.14   | 26 | 2.1667 | Meox1                         | Transcription            |
| DMR10:96506501  | 10 | 96506501  | 700  | 1 | 2.18E-07 | 0.363  | 15 | 2.1429 | Prkca                         | Binding Protein          |
| DMR10:101093801 | 10 | 101093801 | 1400 | 1 | 4.77E-09 | 1.561  | 4  | 0.2857 |                               |                          |
| DMR10:101564301 | 10 | 101564301 | 800  | 1 | 8.18E-07 | 0.532  | 22 | 2.75   |                               |                          |
| DMR10:107961301 | 10 | 107961301 | 600  | 1 | 5.91E-07 | 1.697  | 2  | 0.3333 |                               |                          |
| DMR10:108125401 | 10 | 108125401 | 1200 | 1 | 2.91E-07 | 0.339  | 41 | 3.4167 | Cbx2                          | Transcription            |
| DMR11:12598201  | 11 | 12598201  | 300  | 1 | 1.84E-07 | 10.363 | 3  | 1      |                               |                          |
| DMR11:29958101  | 11 | 29958101  | 800  | 1 | 9.58E-07 | 2.157  | 19 | 2.375  | Tiam1                         | Transcription            |
| DMR11:35545501  | 11 | 35545501  | 1400 | 1 | 2.78E-07 | 2.546  | 34 | 2.4286 |                               |                          |
| DMR11:37207001  | 11 | 37207001  | 400  | 1 | 1.56E-07 | 1.656  | 0  | 0      | Dscam                         | Extracellular Matrix     |
| DMR11:45363101  | 11 | 45363101  | 800  | 1 | 1.36E-07 | 1.426  | 14 | 1.75   | Tmem30c                       | Cell Cycle               |
| DMR11:62107001  | 11 | 62107001  | 300  | 1 | 7.46E-07 | 1.59   | 1  | 0.3333 | Gramd1c;Zbtb20                | Transcription            |
| DMR11:62135101  | 11 | 62135101  | 200  | 1 | 4.61E-07 | 0.236  | 9  | 4.5    | Gramd1c;Zbtb20                | Transcription            |
| DMR11:64396401  | 11 | 64396401  | 700  | 1 | 2.67E-07 | 2.41   | 18 | 2.5714 | Igsf11;RF00026                | Extracellular Matrix     |
| DMR11:70000901  | 11 | 70000901  | 1500 | 1 | 9.32E-07 | 1.508  | 13 | 0.8667 | Kalrn                         | Signaling                |
| DMR11:73399201  | 11 | 73399201  | 700  | 1 | 2.53E-07 | 1.433  | 2  | 0.2857 |                               |                          |
| DMR11:79777101  | 11 | 79777101  | 400  | 1 | 3.06E-09 | 4.893  | 11 | 2.75   |                               |                          |
| DMR12:5618801   | 12 | 5618801   | 1000 | 1 | 2.58E-07 | 0.257  | 16 | 1.6    | Fry                           | Development              |
| DMR12:10323901  | 12 | 10323901  | 300  | 1 | 1.65E-07 | 2.29   | 0  | 0      | Wasf3                         | Cytoskeleton             |
| DMR12:16751701  | 12 | 16751701  | 800  | 1 | 9.37E-07 | 0.386  | 41 | 5.125  | Elf1                          | Receptor                 |
| DMR12:22454001  | 12 | 22454001  | 400  | 2 | 4.95E-07 | 0.435  | 12 | 3      | Slc12a9;Trip6                 | Transport;Cytoskeleton   |
| DMR12:25813601  | 12 | 25813601  | 700  | 1 | 1.71E-07 | 1.456  | 2  | 0.2857 |                               |                          |
| DMR12:27147401  | 12 | 27147401  | 700  | 1 | 7.98E-08 | 1.656  | 2  | 0.2857 | AABR07035916.1                |                          |
| DMR12:29455601  | 12 | 29455601  | 500  | 1 | 9.24E-07 | 1.884  | 0  | 0      | Caln1                         | Signaling                |
| DMR12:29706201  | 12 | 29706201  | 300  | 1 | 8.44E-07 | 1.962  | 8  | 2.6667 | Caln1                         | Signaling                |
| DMR12:34708301  | 12 | 34708301  | 300  | 1 | 9.07E-07 | 2.787  | 3  | 1      |                               |                          |
| DMR12:37483801  | 12 | 37483801  | 2000 | 1 | 5.39E-08 | 0.207  | 19 | 0.95   | Tmed2;Rilpl1                  | Metabolism;Transcription |

|                 |    |           |       |   |          |        |      |         |                                                                                                                         |                      |
|-----------------|----|-----------|-------|---|----------|--------|------|---------|-------------------------------------------------------------------------------------------------------------------------|----------------------|
| DMR12:37496201  | 12 | 37496201  | 400   | 1 | 7.46E-07 | 0.197  | 11   | 2.75    | Rilp1                                                                                                                   | Transcription        |
| DMR12:39212301  | 12 | 39212301  | 600   | 2 | 1.89E-08 | 0.324  | 18   | 3       | Anapc5                                                                                                                  |                      |
| DMR12:46239801  | 12 | 46239801  | 3200  | 2 | 1.73E-08 | 0.285  | 37   | 1.1562  | RF00100                                                                                                                 |                      |
| DMR12:48847001  | 12 | 48847001  | 900   | 1 | 1.67E-07 | 1.56   | 9    | 1       | Wscd2                                                                                                                   |                      |
| DMR13:2515101   | 13 | 2515101   | 2500  | 1 | 9.25E-07 | 0.355  | 99   | 3.96    |                                                                                                                         |                      |
| DMR13:32137701  | 13 | 32137701  | 1900  | 1 | 5.44E-07 | 0.417  | 78   | 4.1053  |                                                                                                                         |                      |
| DMR13:35165701  | 13 | 35165701  | 2300  | 1 | 6.75E-07 | 1.695  | 30   | 1.3043  |                                                                                                                         |                      |
| DMR13:44541801  | 13 | 44541801  | 700   | 1 | 4.38E-07 | 1.588  | 2    | 0.2857  | AABR07020879.1                                                                                                          |                      |
| DMR13:45623201  | 13 | 45623201  | 300   | 1 | 4.84E-07 | 1.804  | 3    | 1       |                                                                                                                         |                      |
| DMR13:48015801  | 13 | 48015801  | 400   | 1 | 1.01E-07 | 1.935  | 5    | 1.25    | Rassf5                                                                                                                  |                      |
| DMR13:52035001  | 13 | 52035001  | 900   | 1 | 3.37E-07 | 7.643  | 8    | 0.8889  |                                                                                                                         |                      |
| DMR13:53100501  | 13 | 53100501  | 400   | 1 | 6.57E-08 | 0.33   | 14   | 3.5     | RGD1311892                                                                                                              |                      |
| DMR13:60152101  | 13 | 60152101  | 300   | 2 | 2.24E-10 | 1.717  | 2    | 0.6667  |                                                                                                                         |                      |
| DMR13:68530301  | 13 | 68530301  | 300   | 1 | 5.70E-07 | 0.328  | 4    | 1.3333  |                                                                                                                         |                      |
| DMR13:70521301  | 13 | 70521301  | 600   | 1 | 5.95E-07 | 2.245  | 5    | 0.8333  | Nmnat2                                                                                                                  | Metabolism           |
| DMR13:80356101  | 13 | 80356101  | 500   | 1 | 3.63E-08 | 0.076  | 8    | 1.6     | Dnm3                                                                                                                    | Cytoskeleton         |
| DMR13:89293301  | 13 | 89293301  | 400   | 1 | 1.97E-08 | 0.346  | 14   | 3.5     | Fcrib;Fcrla                                                                                                             | Receptor             |
| DMR13:96263301  | 13 | 96263301  | 1200  | 1 | 2.01E-07 | 0.347  | 21   | 1.75    |                                                                                                                         |                      |
| DMR13:104476501 | 13 | 104476501 | 300   | 1 | 5.51E-07 | 0.391  | 6    | 2       | AABR07022053.1                                                                                                          |                      |
| DMR13:106575301 | 13 | 106575301 | 700   | 1 | 3.02E-08 | 1.55   | 7    | 1       | Esrrg                                                                                                                   | Receptor             |
| DMR13:106940401 | 13 | 106940401 | 400   | 1 | 2.37E-07 | 2.539  | 3    | 0.75    | Ush2a                                                                                                                   | Extracellular Matrix |
| DMR13:108572401 | 13 | 108572401 | 2600  | 1 | 1.33E-07 | 3.223  | 33   | 1.2692  | AABR07022113.1                                                                                                          |                      |
| DMR14:8254201   | 14 | 8254201   | 1300  | 1 | 2.33E-07 | 2.346  | 15   | 1.1538  | Mapk10                                                                                                                  | Signaling            |
| DMR14:8968801   | 14 | 8968801   | 1400  | 1 | 4.34E-07 | 0.368  | 61   | 4.3571  |                                                                                                                         |                      |
| DMR14:11686101  | 14 | 11686101  | 800   | 1 | 6.48E-07 | 0.337  | 29   | 3.625   |                                                                                                                         |                      |
| DMR14:14677101  | 14 | 14677101  | 300   | 1 | 1.44E-07 | 0.26   | 4    | 1.3333  | Fras1                                                                                                                   | Development          |
| DMR14:17349201  | 14 | 17349201  | 1200  | 1 | 1.94E-07 | 1.688  | 10   | 0.8333  |                                                                                                                         |                      |
| DMR14:35819301  | 14 | 35819301  | 1000  | 1 | 5.57E-07 | 1.376  | 6    | 0.6     |                                                                                                                         |                      |
| DMR14:36882401  | 14 | 36882401  | 400   | 1 | 2.92E-07 | 2.012  | 1    | 0.25    | AABR07014897.1                                                                                                          |                      |
| DMR14:37621401  | 14 | 37621401  | 200   | 1 | 5.37E-07 | 5.633  | 3    | 1.5     | Fryl                                                                                                                    |                      |
| DMR14:42884901  | 14 | 42884901  | 900   | 1 | 7.52E-07 | 0.411  | 18   | 2       | Limch1                                                                                                                  | Cytoskeleton         |
| DMR14:46522201  | 14 | 46522201  | 9000  | 3 | 1.14E-07 | 0.976  | 680  | 7.5556  | AABR07015055.1;AABR07015057.1;AABR07015055.2;AABR07015056.1                                                             |                      |
| DMR14:46532501  | 14 | 46532501  | 6600  | 1 | 1.67E-08 | 1.481  | 85   | 1.2879  | AABR07015055.1;AABR07015057.1;AABR07015055.2;AABR07015056.1                                                             |                      |
| DMR14:46540101  | 14 | 46540101  | 1300  | 1 | 1.44E-07 | 1.919  | 20   | 1.5385  |                                                                                                                         |                      |
| DMR14:46548101  | 14 | 46548101  | 8000  | 2 | 8.46E-08 | 0.792  | 126  | 1.575   |                                                                                                                         |                      |
| DMR14:46588301  | 14 | 46588301  | 800   | 1 | 1.86E-08 | 0.463  | 80   | 10      | RF01518;AABR07015066.1;AABR07015067.1;AABR07015067.2                                                                    |                      |
| DMR14:46590101  | 14 | 46590101  | 15400 | 3 | 9.12E-08 | 0.819  | 385  | 2.5     | RF01518;AABR07015066.1;AABR07015067.1;AABR07015067.2                                                                    |                      |
| DMR14:46619801  | 14 | 46619801  | 1600  | 1 | 9.49E-07 | 1.307  | 19   | 1.1875  |                                                                                                                         |                      |
| DMR14:46636901  | 14 | 46636901  | 5400  | 1 | 1.49E-10 | 0.525  | 600  | 11.1111 | RF01518;Rn5-8s;AABR07015078.1;AABR07015078.2                                                                            |                      |
| DMR14:46643301  | 14 | 46643301  | 15500 | 7 | 1.08E-08 | 0.486  | 1496 | 9.6516  | RF01518;Rn5-8s;AABR07015078.1;AABR07015078.2;AABR07015079.1;AABR07015080.2;AABR07015081.2;AABR07015080.1;AABR07015081.1 |                      |
| DMR14:46660201  | 14 | 46660201  | 1500  | 1 | 1.69E-07 | 1.561  | 23   | 1.5333  | AABR07015078.1;AABR07015078.2;AABR07015079.1;AABR07015080.2;AABR07015081.2;AABR07015080.1;AABR07015081.1                |                      |
| DMR14:46679001  | 14 | 46679001  | 9500  | 1 | 4.59E-07 | 0.345  | 1044 | 10.9895 | RF01518;RF00002                                                                                                         |                      |
| DMR14:60462101  | 14 | 60462101  | 400   | 1 | 9.49E-07 | 0.294  | 9    | 2.25    | Anapc4                                                                                                                  | Cell Cycle           |
| DMR14:70007701  | 14 | 70007701  | 200   | 1 | 8.51E-08 | 3.638  | 1    | 0.5     | Fam184b                                                                                                                 |                      |
| DMR14:105548001 | 14 | 105548001 | 600   | 1 | 1.97E-07 | 1.876  | 1    | 0.1667  |                                                                                                                         |                      |
| DMR15:5392701   | 15 | 5392701   | 700   | 2 | 1.50E-07 | 1.967  | 1    | 0.1429  |                                                                                                                         |                      |
| DMR15:5436301   | 15 | 5436301   | 800   | 1 | 2.30E-10 | 2.166  | 1    | 0.125   | Spetex-2F;AABR07016950.2                                                                                                | Unknown              |
| DMR15:9138901   | 15 | 9138901   | 400   | 1 | 1.85E-07 | 2.87   | 4    | 1       |                                                                                                                         |                      |
| DMR15:23851001  | 15 | 23851001  | 1000  | 1 | 4.80E-07 | 1.638  | 4    | 0.4     | Samd4a                                                                                                                  | Signaling            |
| DMR15:28779401  | 15 | 28779401  | 400   | 1 | 4.99E-07 | 0.244  | 32   | 8       | Olr1639                                                                                                                 |                      |
| DMR15:42827401  | 15 | 42827401  | 100   | 1 | 2.75E-07 | 15.438 | 1    | 1       | Chrna2;Ptk2b                                                                                                            | Receptor;Signaling   |



|                 |    |           |      |   |          |       |     |        |                                             |               |
|-----------------|----|-----------|------|---|----------|-------|-----|--------|---------------------------------------------|---------------|
| DMR15:45368001  | 15 | 45368001  | 600  | 1 | 2.02E-08 | 0.332 | 12  | 2      | Dleu7                                       |               |
| DMR15:52736001  | 15 | 52736001  | 600  | 1 | 4.16E-09 | 1.436 | 0   | 0      |                                             |               |
| DMR15:56301201  | 15 | 56301201  | 900  | 1 | 1.66E-07 | 0.247 | 27  | 3      |                                             |               |
| DMR15:59583901  | 15 | 59583901  | 2000 | 1 | 3.38E-08 | 0.499 | 154 | 7.7    |                                             |               |
| DMR15:65440701  | 15 | 65440701  | 500  | 1 | 4.78E-07 | 2.009 | 3   | 0.6    |                                             |               |
| DMR15:85819901  | 15 | 85819901  | 300  | 1 | 6.61E-07 | 0.37  | 5   | 1.6667 |                                             |               |
| DMR15:104154601 | 15 | 104154601 | 600  | 1 | 1.96E-07 | 0.445 | 17  | 2.8333 | Dzip1                                       | Transcription |
| DMR16:5676301   | 16 | 5676301   | 800  | 1 | 6.25E-07 | 1.491 | 6   | 0.75   | Cacna2d3                                    | Transport     |
| DMR16:9600301   | 16 | 9600301   | 1000 | 1 | 7.62E-07 | 0.428 | 29  | 2.9    | Arhgap22                                    | Unknown       |
| DMR16:15614601  | 16 | 15614601  | 400  | 1 | 6.58E-08 | 2.264 | 2   | 0.5    |                                             |               |
| DMR16:15627201  | 16 | 15627201  | 1300 | 1 | 6.20E-07 | 2.053 | 26  | 2      |                                             |               |
| DMR16:32181401  | 16 | 32181401  | 500  | 1 | 7.51E-08 | 1.817 | 3   | 0.6    | Sh3rf1                                      |               |
| DMR16:45437101  | 16 | 45437101  | 300  | 1 | 1.63E-07 | 2.524 | 1   | 0.3333 |                                             |               |
| DMR16:73488501  | 16 | 73488501  | 700  | 1 | 2.06E-07 | 1.961 | 2   | 0.2857 |                                             |               |
| DMR16:81584001  | 16 | 81584001  | 1200 | 1 | 6.44E-07 | 2.695 | 3   | 0.25   | LOC103693999;NEWGENE_1<br>582994;RF00026    |               |
| DMR16:84591901  | 16 | 84591901  | 400  | 1 | 2.30E-07 | 1.645 | 1   | 0.25   | Myo16                                       | Cytoskeleton  |
| DMR17:6916801   | 17 | 6916801   | 600  | 1 | 8.44E-07 | 1.72  | 8   | 1.3333 | LOC681410                                   | Transcription |
| DMR17:13855801  | 17 | 13855801  | 1600 | 1 | 9.65E-07 | 0.357 | 21  | 1.3125 | RF00017                                     |               |
| DMR17:17851201  | 17 | 17851201  | 800  | 1 | 3.74E-07 | 0.275 | 19  | 2.375  | Rnf144b                                     | Proteolysis   |
| DMR17:17900601  | 17 | 17900601  | 400  | 1 | 1.81E-07 | 1.895 | 9   | 2.25   | Rnf144b                                     | Proteolysis   |
| DMR17:20789201  | 17 | 20789201  | 3500 | 1 | 2.14E-07 | 1.413 | 29  | 0.8286 |                                             |               |
| DMR17:22557301  | 17 | 22557301  | 300  | 1 | 4.43E-07 | 1.824 | 0   | 0      |                                             |               |
| DMR17:37677701  | 17 | 37677701  | 400  | 1 | 7.51E-07 | 4.296 | 5   | 1.25   | RGD1563300;AABR0702758<br>1.1               |               |
| DMR17:75670701  | 17 | 75670701  | 500  | 1 | 5.29E-07 | 2.082 | 3   | 0.6    |                                             |               |
| DMR17:79094501  | 17 | 79094501  | 2700 | 1 | 3.52E-07 | 0.313 | 85  | 3.1481 | Fam171a1                                    |               |
| DMR18:12279201  | 18 | 12279201  | 1100 | 1 | 1.66E-07 | 4.977 | 15  | 1.3636 | AABR07031399.1                              |               |
| DMR18:12752901  | 18 | 12752901  | 700  | 1 | 1.10E-07 | 1.815 | 11  | 1.5714 |                                             |               |
| DMR18:15459101  | 18 | 15459101  | 500  | 1 | 4.62E-07 | 0.215 | 11  | 2.2    | B4galt6                                     | Golgi         |
| DMR18:25274101  | 18 | 25274101  | 1000 | 2 | 4.34E-07 | 1.446 | 16  | 1.6    | AABR07031674.1                              |               |
| DMR18:34247701  | 18 | 34247701  | 300  | 1 | 3.76E-07 | 4.236 | 1   | 0.3333 |                                             |               |
| DMR18:53970401  | 18 | 53970401  | 2400 | 1 | 4.22E-08 | 1.568 | 24  | 1      | Adamts19                                    | Proteolysis   |
| DMR18:61745701  | 18 | 61745701  | 600  | 1 | 6.98E-07 | 1.553 | 3   | 0.5    |                                             |               |
| DMR18:64606101  | 18 | 64606101  | 1900 | 1 | 7.49E-07 | 2.219 | 17  | 0.8947 |                                             |               |
| DMR18:69962001  | 18 | 69962001  | 1200 | 1 | 4.21E-07 | 8.331 | 12  | 1      |                                             |               |
| DMR18:70495301  | 18 | 70495301  | 100  | 1 | 3.61E-07 | 7.928 | 1   | 1      | Myo5b                                       | Cytoskeleton  |
| DMR18:84832101  | 18 | 84832101  | 200  | 1 | 4.44E-08 | 2.966 | 0   | 0      |                                             |               |
| DMR19:249701    | 19 | 249701    | 300  | 1 | 1.22E-07 | 3.268 | 1   | 0.3333 | AABR07042607.1                              |               |
| DMR19:5829301   | 19 | 5829301   | 8600 | 1 | 6.57E-07 | 0.746 | 230 | 2.6744 |                                             |               |
| DMR19:18155901  | 19 | 18155901  | 1200 | 3 | 1.17E-07 | 1.763 | 11  | 0.9167 | Tox3                                        | Transcription |
| DMR19:24925901  | 19 | 24925901  | 600  | 1 | 5.21E-09 | 3.209 | 9   | 1.5    |                                             |               |
| DMR19:25337801  | 19 | 25337801  | 400  | 1 | 9.02E-07 | 0.422 | 14  | 3.5    | Zswim4                                      | Transcription |
| DMR19:27994001  | 19 | 27994001  | 600  | 2 | 7.37E-09 | 2.114 | 5   | 0.8333 | AABR07043389.1                              |               |
| DMR19:39448501  | 19 | 39448501  | 1100 | 1 | 3.05E-07 | 2.506 | 18  | 1.6364 |                                             |               |
| DMR19:42763101  | 19 | 42763101  | 3600 | 1 | 3.33E-07 | 0.2   | 144 | 4      | Zfhx3                                       | Transcription |
| DMR19:42792801  | 19 | 42792801  | 1000 | 1 | 5.44E-07 | 0.149 | 23  | 2.3    | Zfhx3                                       | Transcription |
| DMR19:52477001  | 19 | 52477001  | 600  | 1 | 9.10E-07 | 1.38  | 3   | 0.5    | Cotl1                                       | Cytoskeleton  |
| DMR19:53268901  | 19 | 53268901  | 400  | 1 | 4.14E-07 | 2.172 | 3   | 0.75   |                                             |               |
| DMR19:54125601  | 19 | 54125601  | 600  | 1 | 7.76E-09 | 0.348 | 29  | 4.8333 | Gse1                                        | Transcription |
| DMR19:54996901  | 19 | 54996901  | 2000 | 2 | 2.42E-09 | 0.554 | 36  | 1.8    |                                             |               |
| DMR19:56971701  | 19 | 56971701  | 1300 | 1 | 5.81E-07 | 1.648 | 8   | 0.6154 | Cox6c-ps1                                   |               |
| DMR19:57172201  | 19 | 57172201  | 400  | 1 | 2.16E-07 | 0.316 | 9   | 2.25   | Pgbd5                                       | Epigenetic    |
| DMR19:59156801  | 19 | 59156801  | 1000 | 1 | 1.44E-07 | 2.231 | 11  | 1.1    |                                             |               |
| DMR20:5072201   | 20 | 5072201   | 300  | 1 | 5.21E-07 | 3.146 | 5   | 1.6667 | Ly6g6d;Ly6g6e;Ly6g6f;AC094<br>348.1;Abhd16a | Immune        |
| DMR20:8345601   | 20 | 8345601   | 1500 | 1 | 5.55E-07 | 0.136 | 31  | 2.0667 | Cmtr1                                       | Epigenetic    |
| DMR20:18691201  | 20 | 18691201  | 600  | 1 | 4.33E-07 | 2.336 | 5   | 0.8333 |                                             |               |
| DMR20:22907101  | 20 | 22907101  | 1100 | 1 | 6.80E-08 | 0.421 | 31  | 2.8182 | Reep3                                       | Receptor      |
| DMR20:28121201  | 20 | 28121201  | 300  | 1 | 5.58E-07 | 0.368 | 4   | 1.3333 | Ccdc138                                     |               |
| DMR20:32797901  | 20 | 32797901  | 600  | 2 | 2.21E-08 | 1.53  | 0   | 0      | AABR07045047.1                              |               |
| DMR20:40504901  | 20 | 40504901  | 800  | 1 | 4.01E-07 | 1.764 | 8   | 1      | Hs3st5;AABR07045274.1                       | Metabolism    |
| DMR20:47411301  | 20 | 47411301  | 600  | 1 | 9.37E-07 | 0.39  | 14  | 2.3333 | Ostm1                                       |               |
| DMRX:182201     | X  | 182201    | 400  | 1 | 7.80E-08 | 4.072 | 1   | 0.25   |                                             |               |
| DMRX:32237801   | X  | 32237801  | 300  | 1 | 2.38E-08 | 2.506 | 2   | 0.6667 | RF00026;Ca5b                                |               |
| DMRX:36466401   | X  | 36466401  | 5200 | 1 | 1.76E-07 | 0.11  | 108 | 2.0769 |                                             |               |
| DMRX:73399601   | X  | 73399601  | 2000 | 2 | 4.21E-08 | 2.075 | 0   | 0      | Zfp449                                      | Transcription |
